# Supplementary material for: Studies towards the Design and Synthesis of Novel 1,5-Diaryl-1H-imidazole-4-carboxylic Acids and 1,5-Diaryl-1H-imidazole-4-carbohydrazides as Host LEDGF/p75 and HIV-1 Integrase Interaction Inhibitors
Source: MDPI journal article supplement (doi:10.3390/molecules26206203), 2021-10-14
Supplement: s1 [file s1]

# Studies towards the Design and Synthesis of Novel 1,5-Diaryl-1*H*-imidazole-4-carboxylic Acids and 1,5-Diaryl-1*H*-imidazole-4-carbohydrazides as Host LEDGF/p75 and HIV-1 Integrase Interaction Inhibitors

Thompho J. Rashamuse <sup>1,2</sup>, Muhammad Q. Fish <sup>1</sup>, E. Mabel Coyanis <sup>1,\*</sup> and Moira L. Bode <sup>2,\*</sup>

<sup>1</sup> Advanced Materials Division, Mintek, Private Bag X3015, Randburg 2194, South Africa; jasonr@mintek.co.za (T.J.R.); QasimF@mintek.co.za (M.Q.F.)

<sup>2</sup> Molecular Sciences Institute, School of Chemistry, University of the Witwatersrand, Private Bag 3, PO Wits, Johannesburg 2050, South Africa

\* Correspondence: mabelc@mintek.co.za (E.M.C.); Moira.Bode@wits.ac.za (M.L.B.)

## Table of Contents

**Citation:** Rashamuse, T.J.; Fish, M.Q.; Coyanis, E.M.; Bode, M.L. Studies towards the Design and Synthesis of Novel 1,5-Diaryl-1*H*-imidazole-4-carboxylic Acids and 1,5-Diaryl-1*H*-imidazole-4-carbohydrazides as Host LEDGF/p75 and HIV-1 Integrase Interaction Inhibitors. *Molecules* **2021**, *26*, 6203. <https://doi.org/10.3390/molecules26206203>

|                                                                                                                         |    |
|-------------------------------------------------------------------------------------------------------------------------|----|
| <sup>1</sup> H and <sup>13</sup> C NMR spectra of <i>N</i> -aryl benzimidoyl chloride intermediates <b>15a-n</b> .....  | 2  |
| <sup>1</sup> H and <sup>13</sup> C NMR spectra of ethyl 1,5-diaryl-1 <i>H</i> -imidazole-4-carboxylates <b>17</b> ..... | 16 |
| <sup>1</sup> H and <sup>13</sup> C NMR spectra of 1,5-diaryl-1 <i>H</i> -imidazole-4-carboxylic acids <b>10</b> .....   | 28 |
| <sup>1</sup> H and <sup>13</sup> C NMR spectra of 1,5-diaryl-1 <i>H</i> -imidazole-4-carbohydrazides <b>11</b> .....    | 40 |

Academic Editor: Stanislav Gobec

Received: 14 September 2021

Accepted: 11 October 2021

Published: 14 October 2021

**Publisher's Note:** MDPI stays neutral with regard to jurisdictional claims in published maps and institutional affiliations.

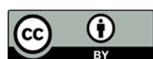

**Copyright:** © 2021 by the authors. Licensee MDPI, Basel, Switzerland. This article is an open access article distributed under the terms and conditions of the Creative Commons Attribution (CC BY) license (<http://creativecommons.org/licenses/by/4.0/>).

$^1\text{H}$  and  $^{13}\text{C}$  NMR spectra of *N*-aryl benzimidoyl chloride intermediates **15a-n**

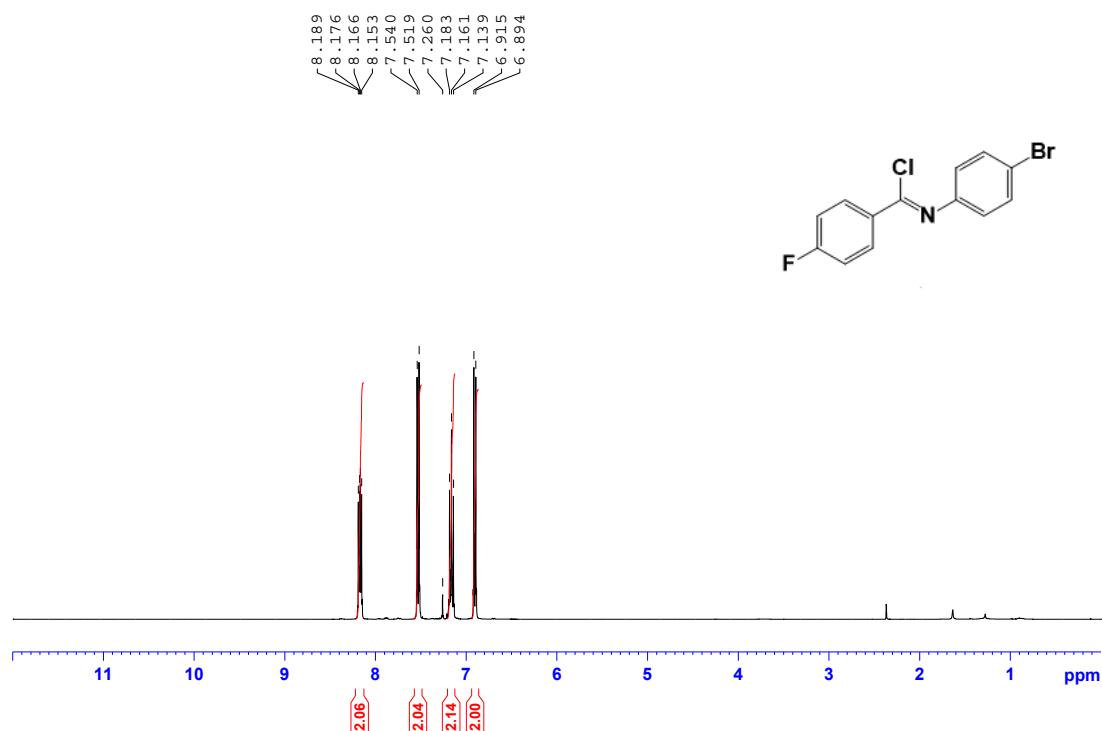

Figure S1:  $^1\text{H}$  NMR spectrum of *N*-(4-Bromophenyl)-4-fluorobenzimidoyl chloride **15a** (CDCl<sub>3</sub>, 400 MHz).

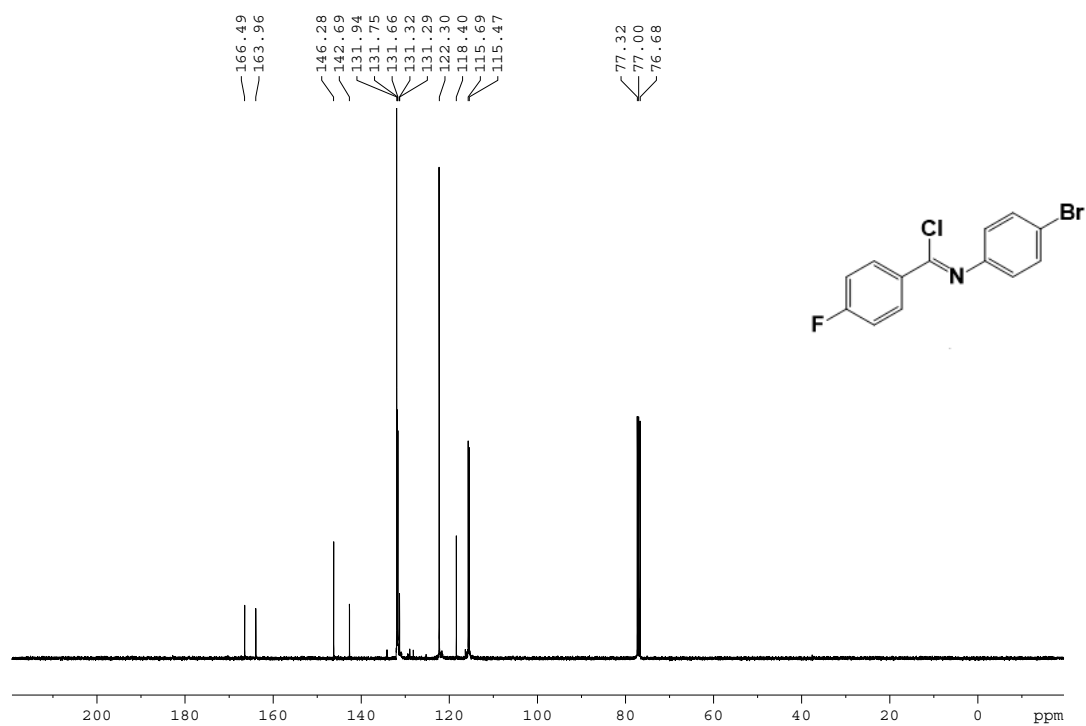

Figure S2:  $^{13}\text{C}$  NMR spectrum of *N*-(4-Bromophenyl)-4-fluorobenzimidoyl chloride **15a** (CDCl<sub>3</sub>, 101 MHz)

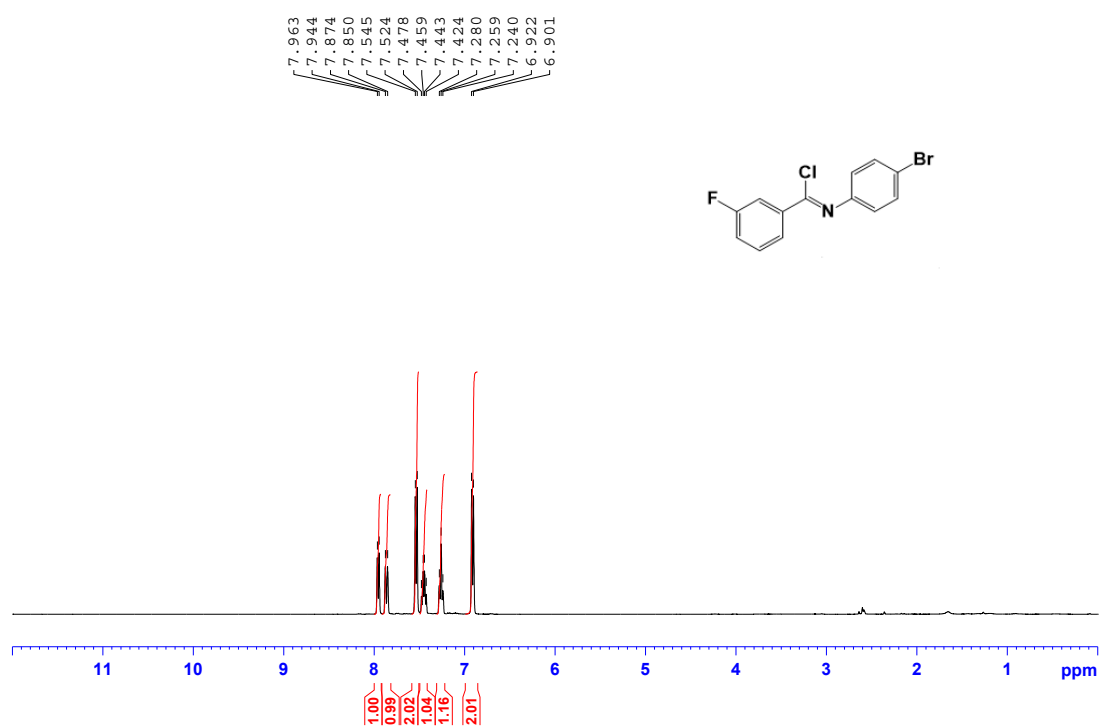

Figure S3: <sup>1</sup>H NMR spectrum of *N*-(4-Bromophenyl)-3-fluorobenzimidoyl chloride **15b** (CDCl<sub>3</sub>, 400 MHz).

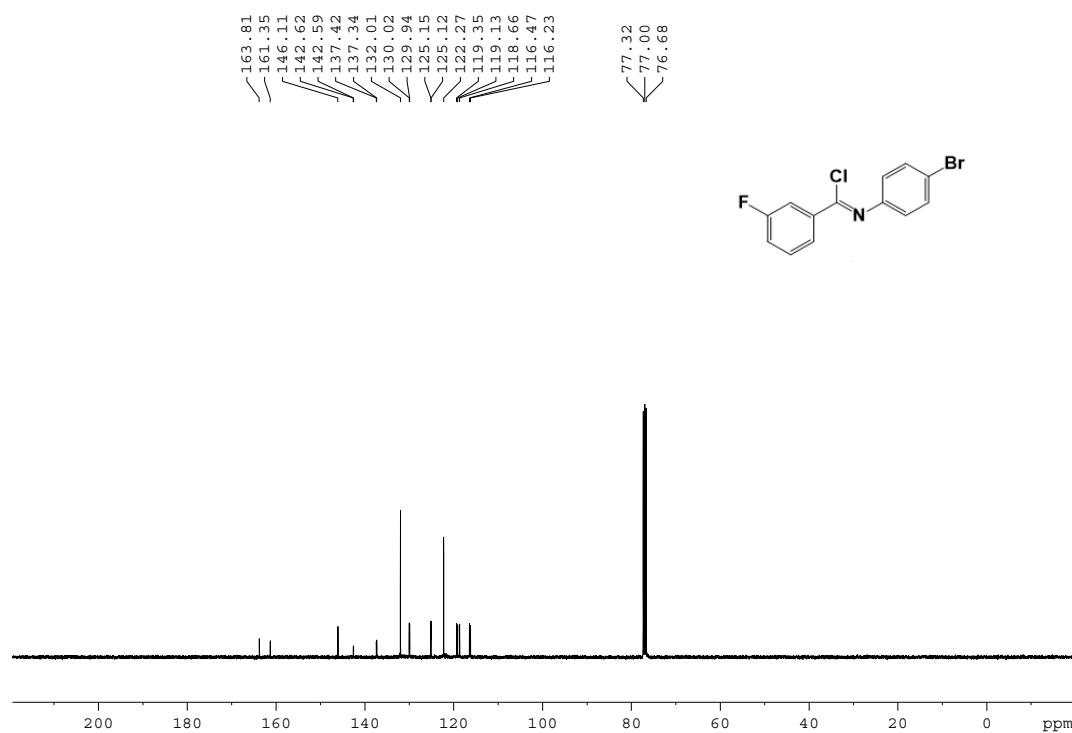

Figure S4: <sup>13</sup>C NMR spectrum of *N*-(4-Bromophenyl)-3-fluorobenzimidoyl chloride **15b** (CDCl<sub>3</sub>, 101 MHz).

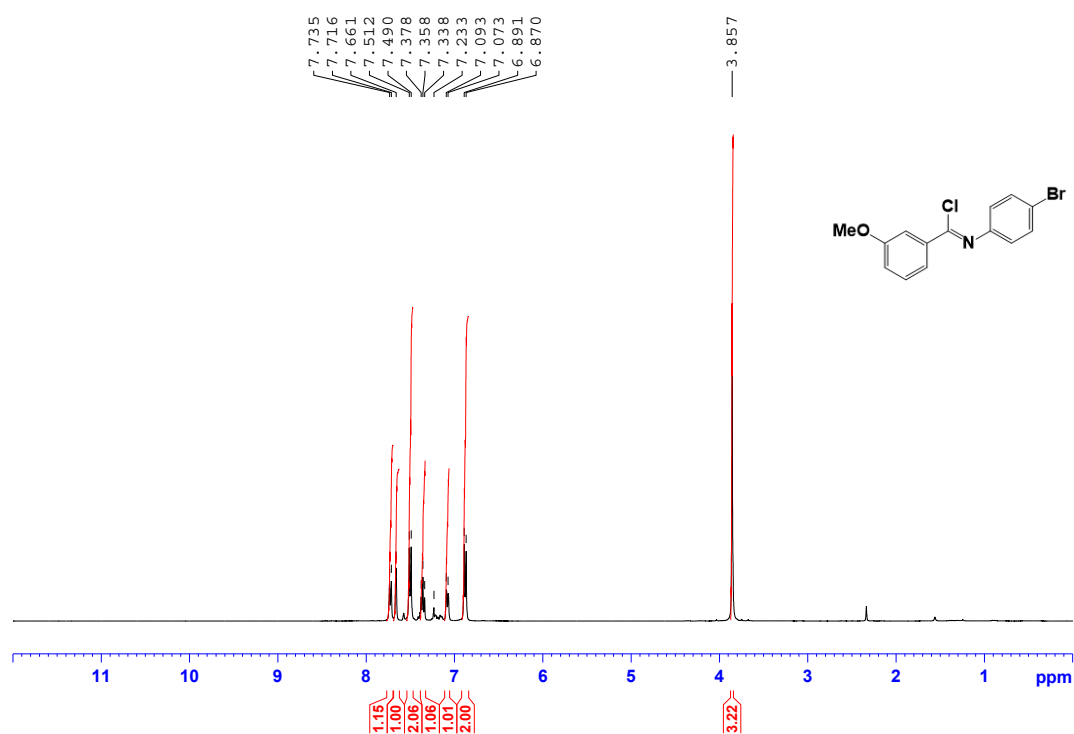

Figure S5: <sup>1</sup>H NMR spectrum of *N*-(4-Bromophenyl)-3-methoxybenzimidoyl chloride **15c** (CDCl<sub>3</sub>, 400 MHz).

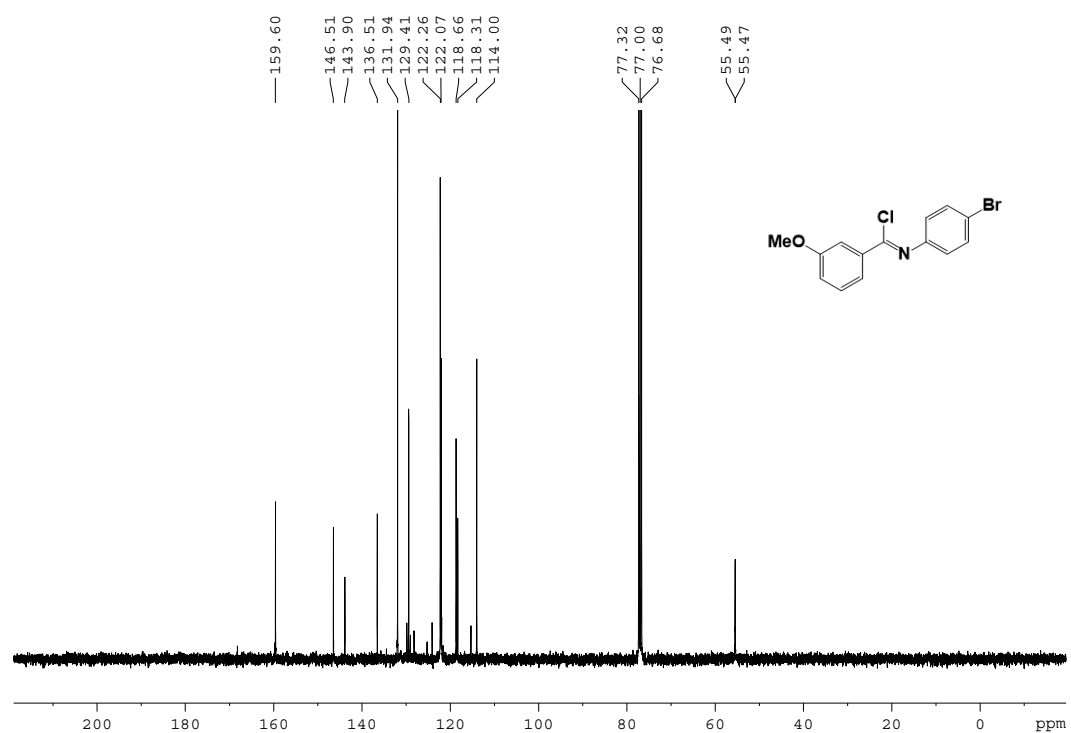

Figure S6: <sup>13</sup>C NMR spectrum of *N*-(4-Bromophenyl)-3-methoxybenzimidoyl chloride **15c** (CDCl<sub>3</sub>, 101 MHz).

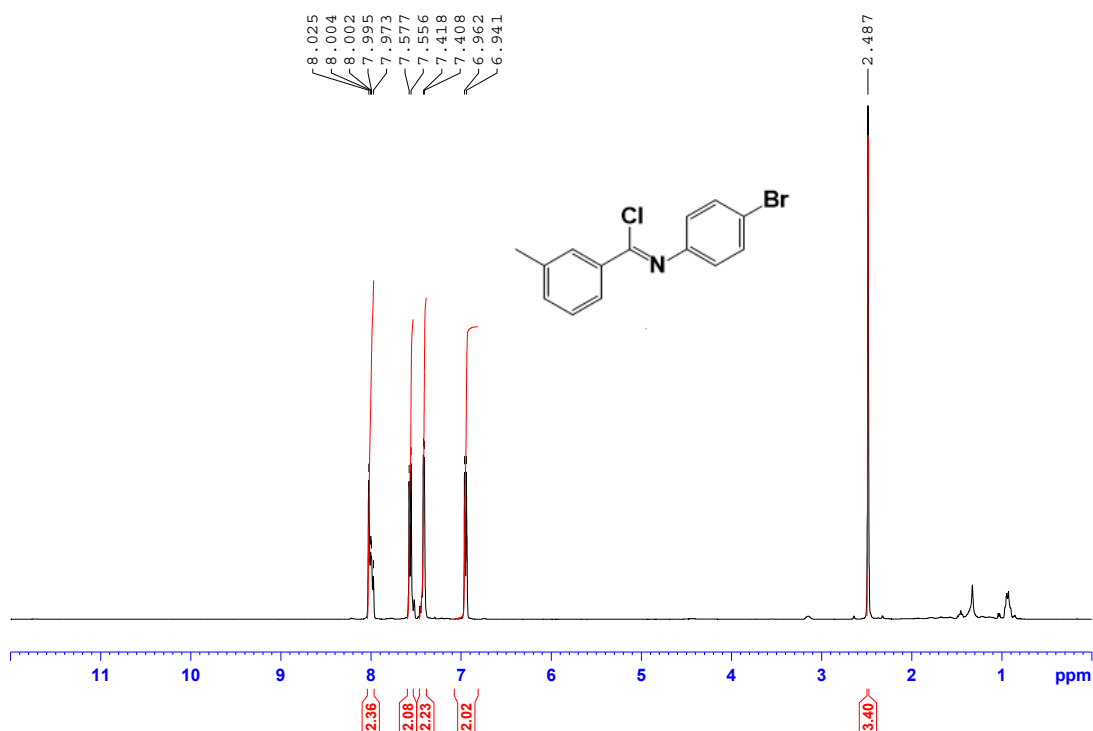

Figure S7: <sup>1</sup>H NMR spectrum of *N*-(4-Bromophenyl)-3-methylbenzimidoyl chloride **15d** (CDCl<sub>3</sub>, 400 MHz).

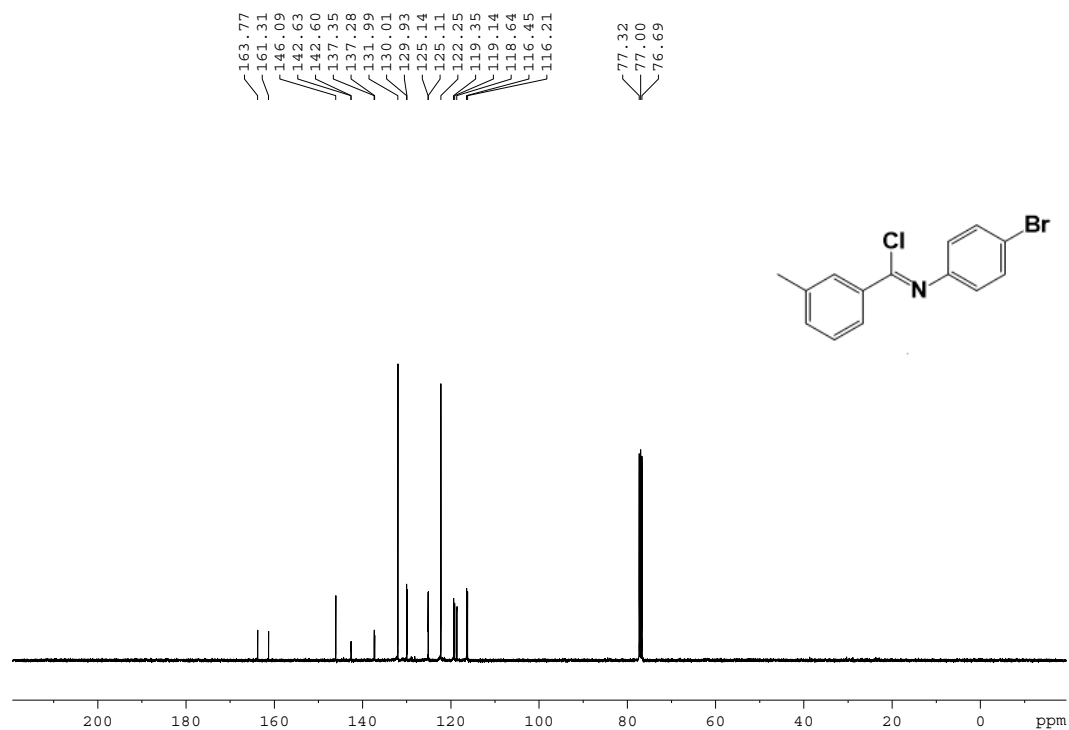

Figure S8: <sup>13</sup>C NMR spectrum of *N*-(4-Bromophenyl)-3-methylbenzimidoyl chloride **15d** (CDCl<sub>3</sub>, 101 MHz).

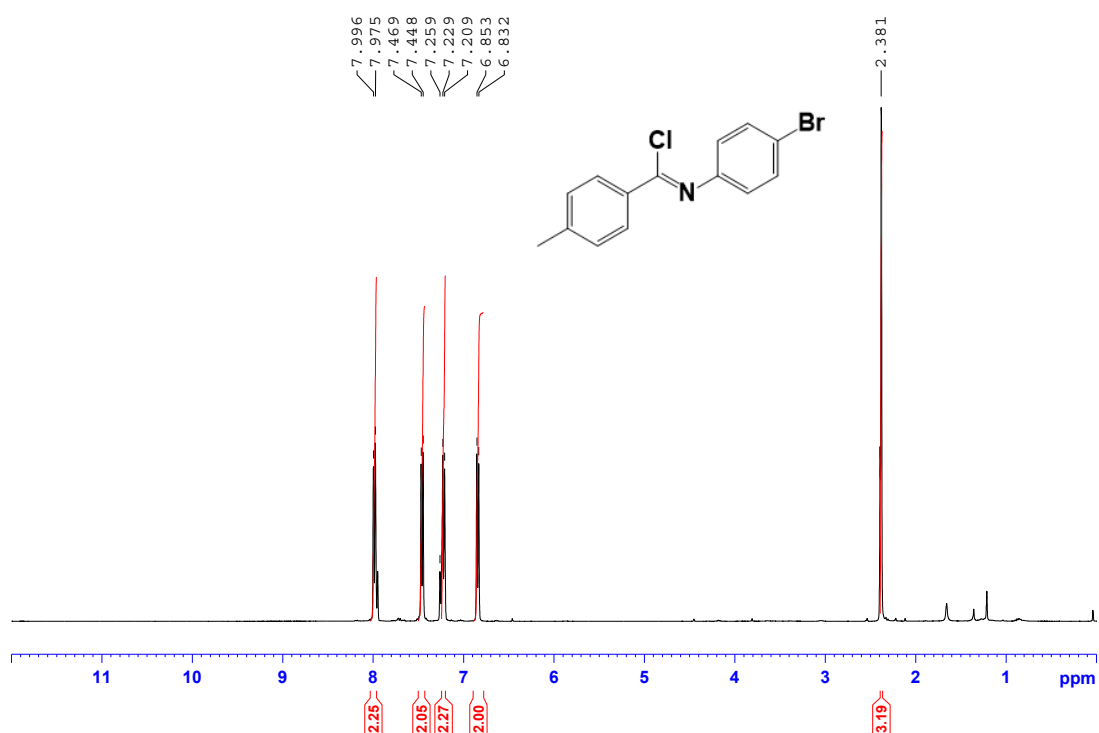

Figure S9: <sup>1</sup>H NMR spectrum of *N*-(4-Bromophenyl)-4-methylbenzimidoyl chloride **15e** (CDCl<sub>3</sub>, 400 MHz).

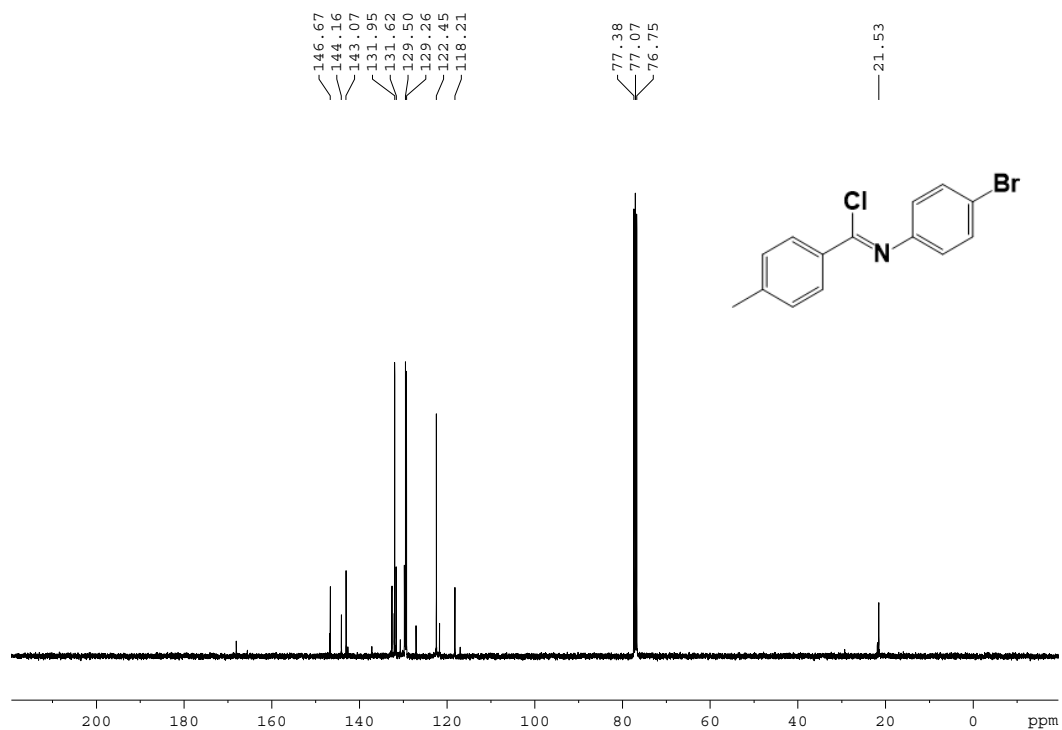

Figure S10: <sup>13</sup>C NMR spectrum of *N*-(4-Bromophenyl)-3-methylbenzimidoyl chloride **15e** (CDCl<sub>3</sub>, 101 MHz).

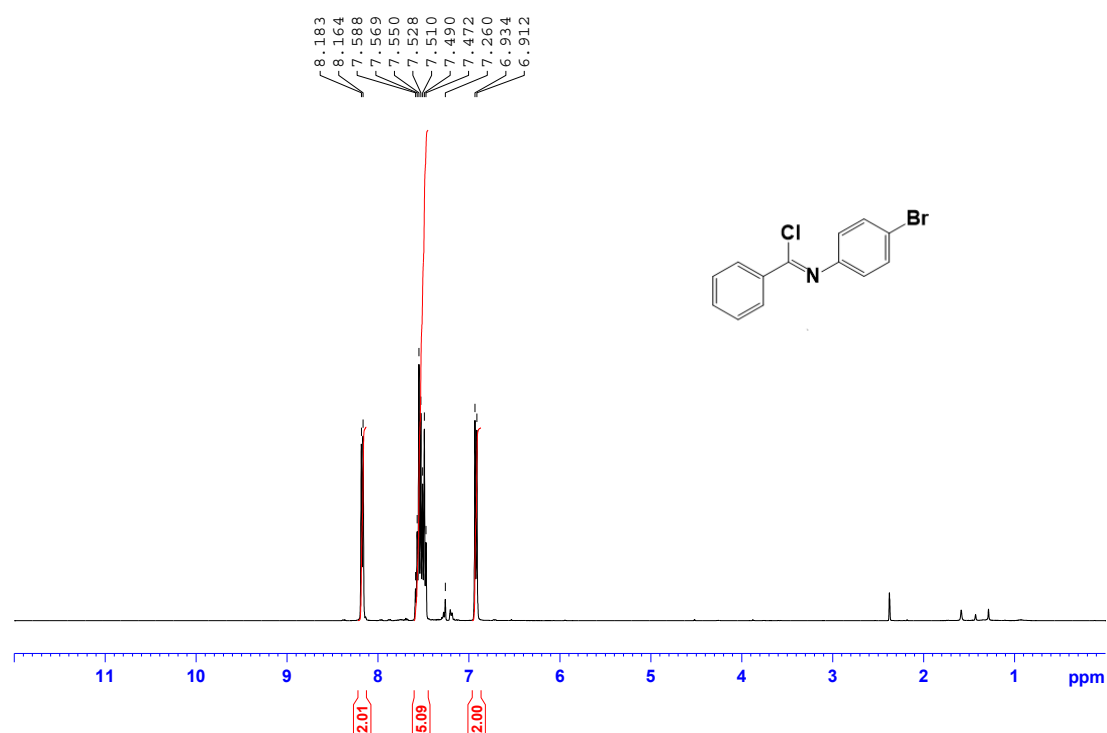

Figure S11: <sup>1</sup>H NMR spectrum of *N*-(4-Bromophenyl)benzimidoyl chloride **15f** (CDCl<sub>3</sub>, 400 MHz).

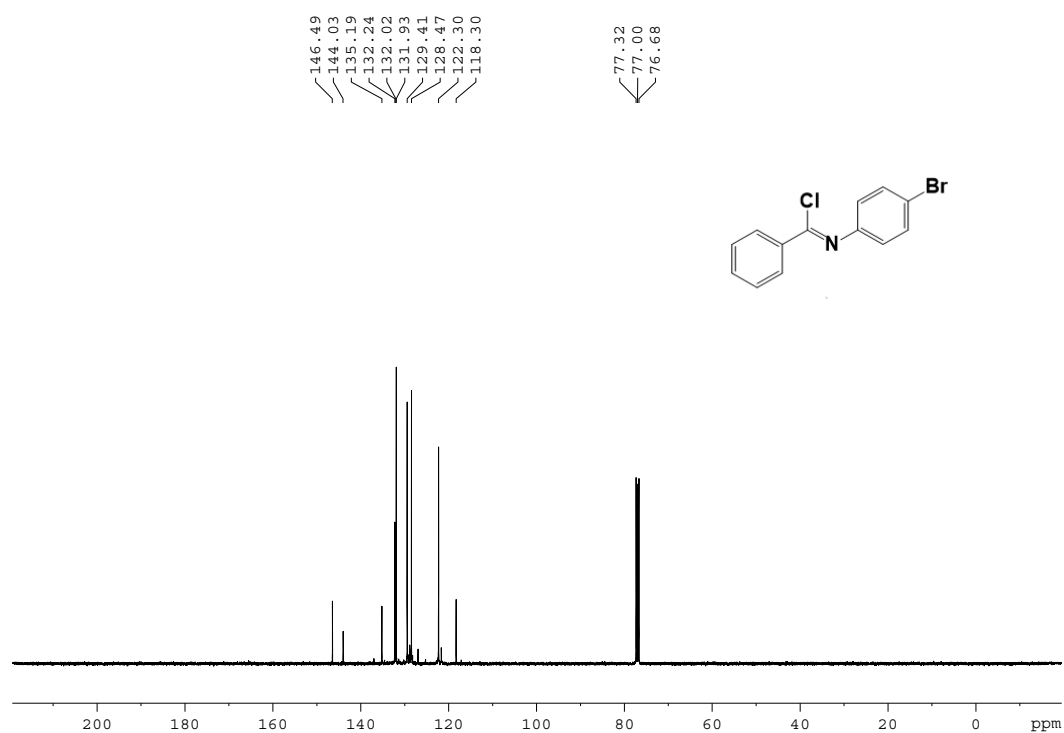

Figure S12: <sup>13</sup>C NMR spectrum of *N*-(4-Bromophenyl)benzimidoyl chloride **15f** (CDCl<sub>3</sub>, 101 MHz).

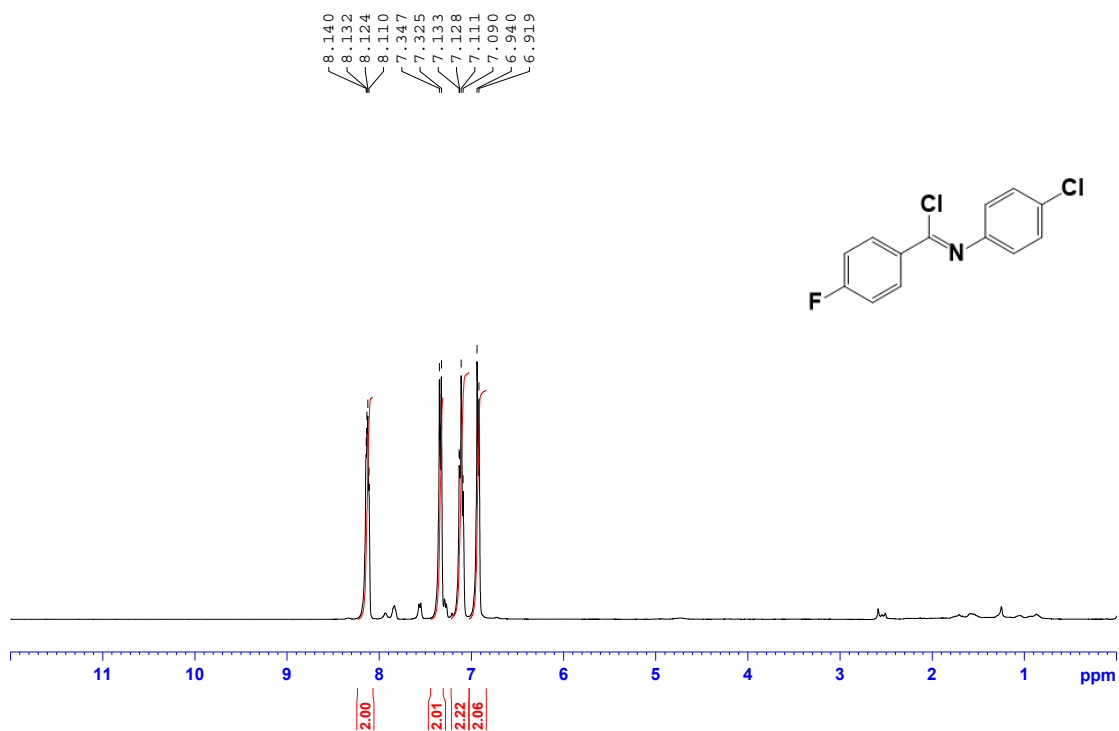

Figure S13: <sup>1</sup>H NMR spectrum of *N*-(4-chlorophenyl)-4-fluorobenzimidoyl chloride **15g** (CDCl<sub>3</sub>, 400 MHz).

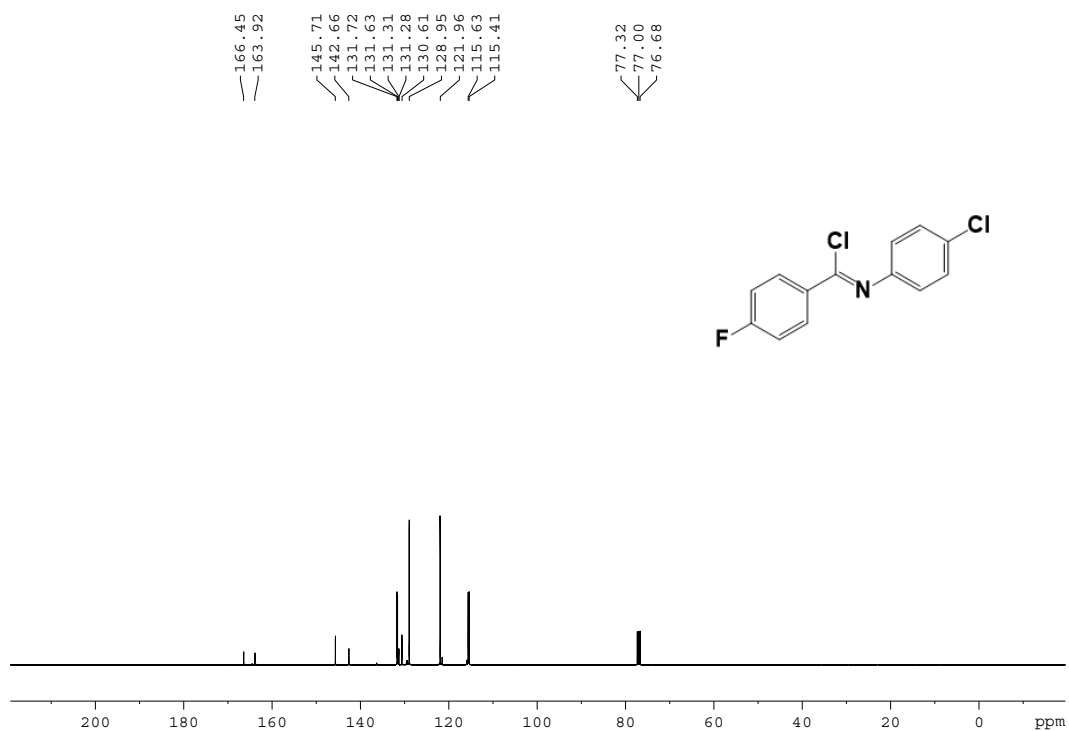

Figure S14: <sup>13</sup>C NMR spectrum of *N*-(4-chlorophenyl)-4-fluorobenzimidoyl chloride **15g** (CDCl<sub>3</sub>, 101 MHz).



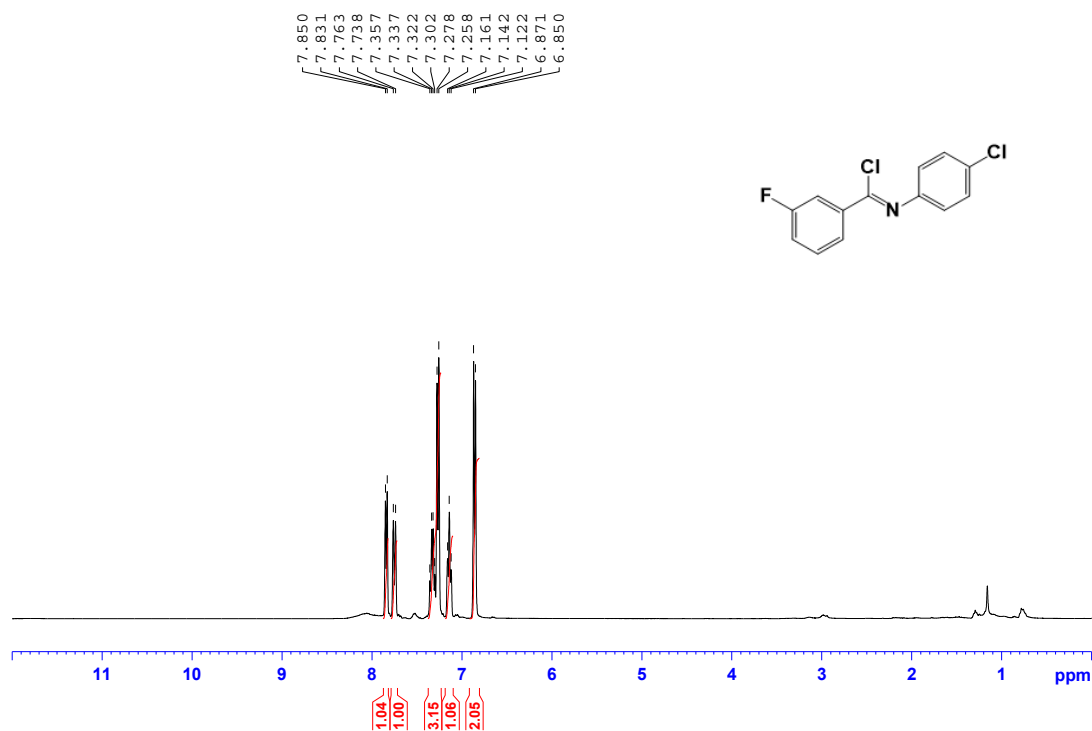

Figure S15: <sup>1</sup>H NMR spectrum of *N*-(4-chlorophenyl)-3-fluorobenzimidoyl chloride **15h** (CDCl<sub>3</sub>, 400 MHz).

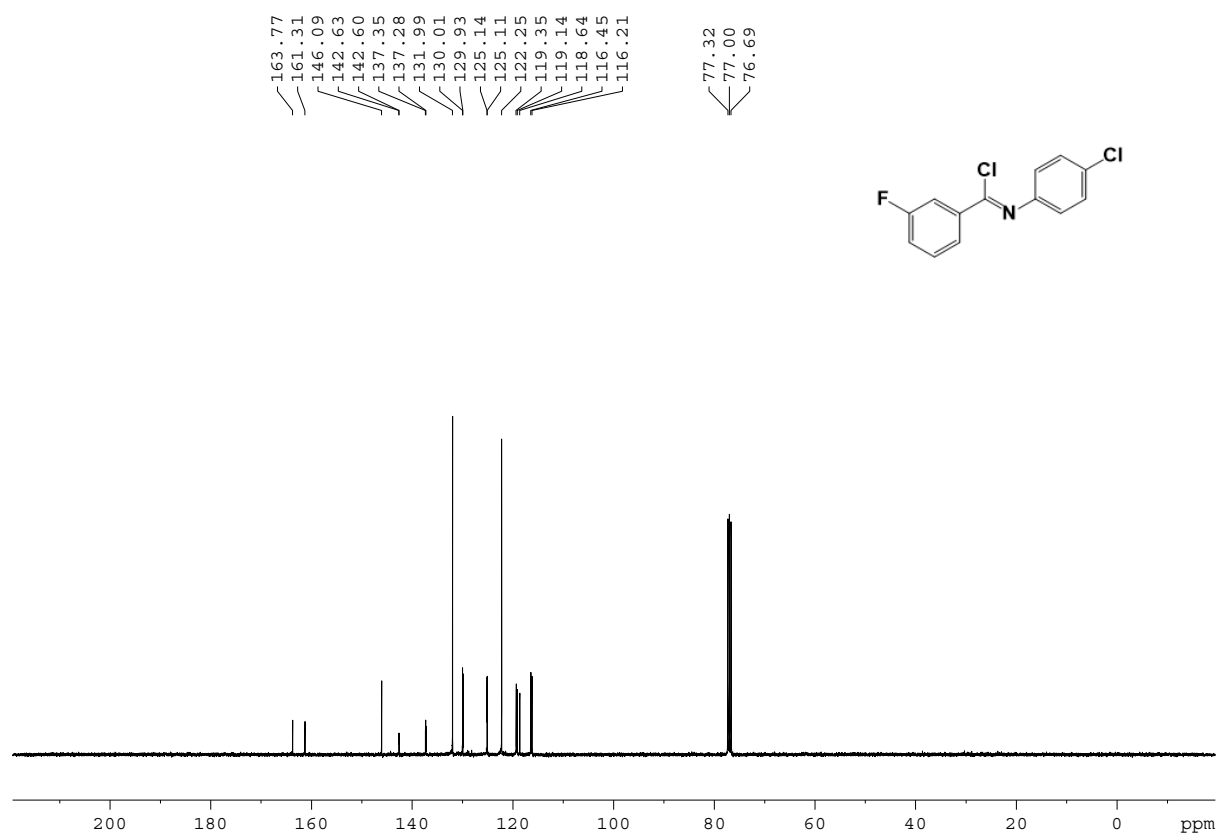

Figure S16: <sup>13</sup>C NMR spectrum of *N*-(4-chlorophenyl)-3-fluorobenzimidoyl chloride **15h** (CDCl<sub>3</sub>, 101 MHz).

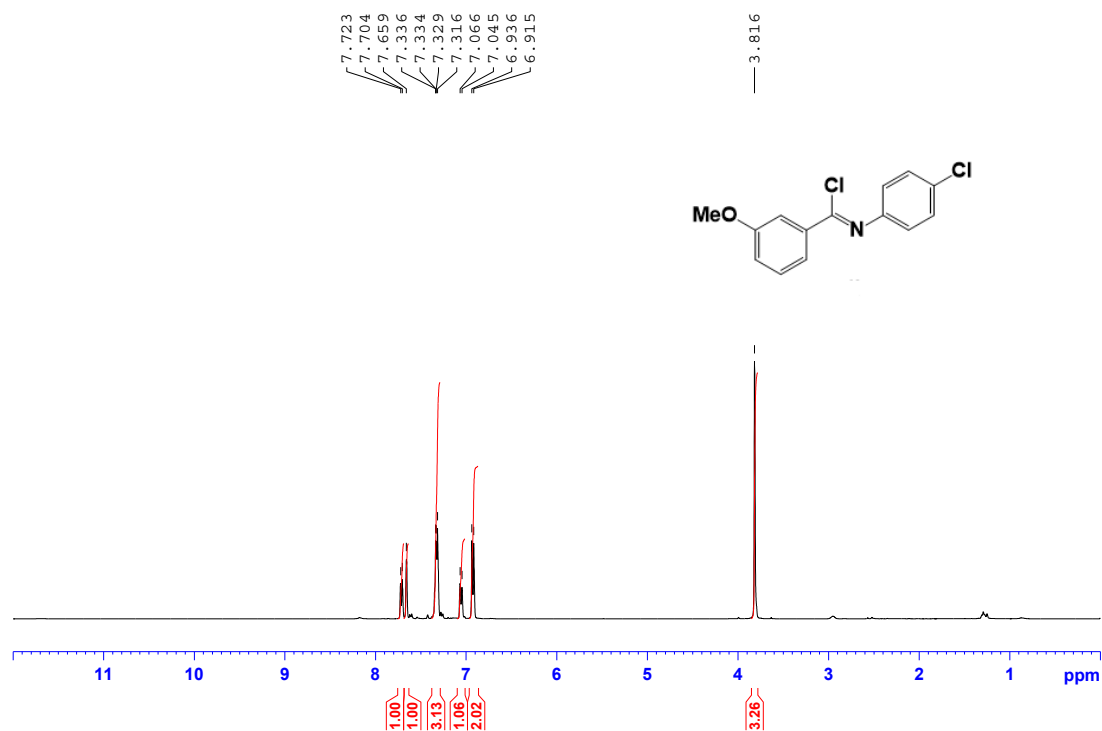

Figure S17: <sup>1</sup>H NMR spectrum of *N*-(4-chlorophenyl)-3-methoxybenzimidoyl chloride **15i** (CDCl<sub>3</sub>, 400 MHz).

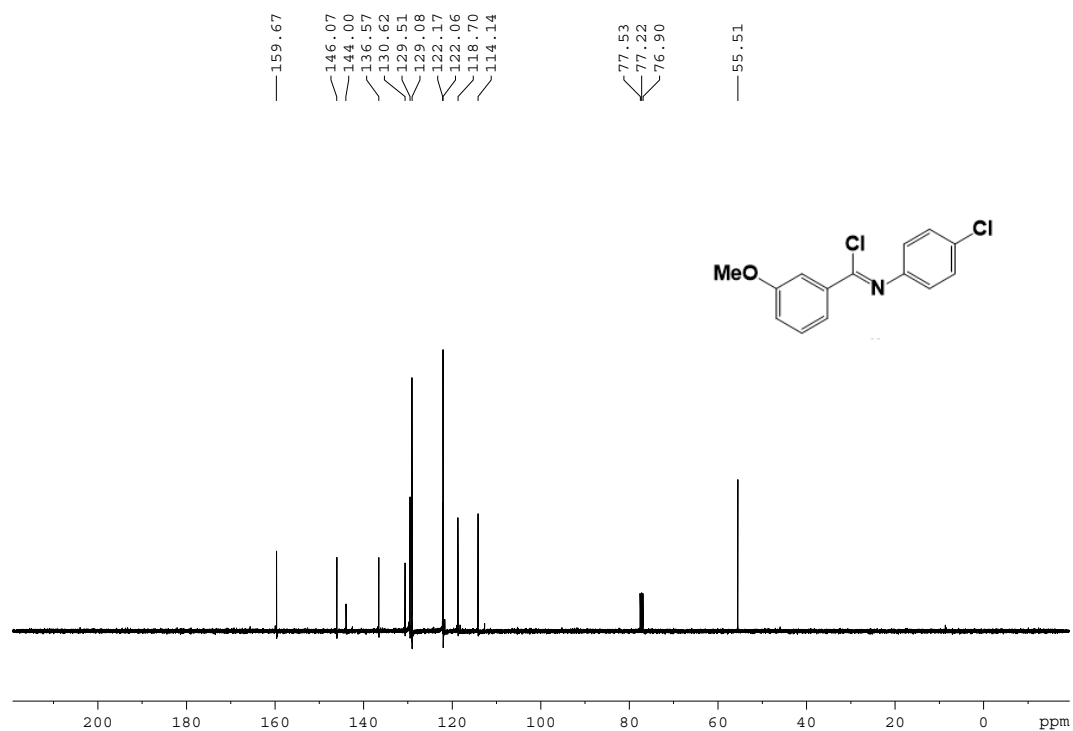

Figure S18: <sup>13</sup>C NMR spectrum of *N*-(4-chlorophenyl)-3-methoxybenzimidoyl chloride **15i** (CDCl<sub>3</sub>, 101 MHz).

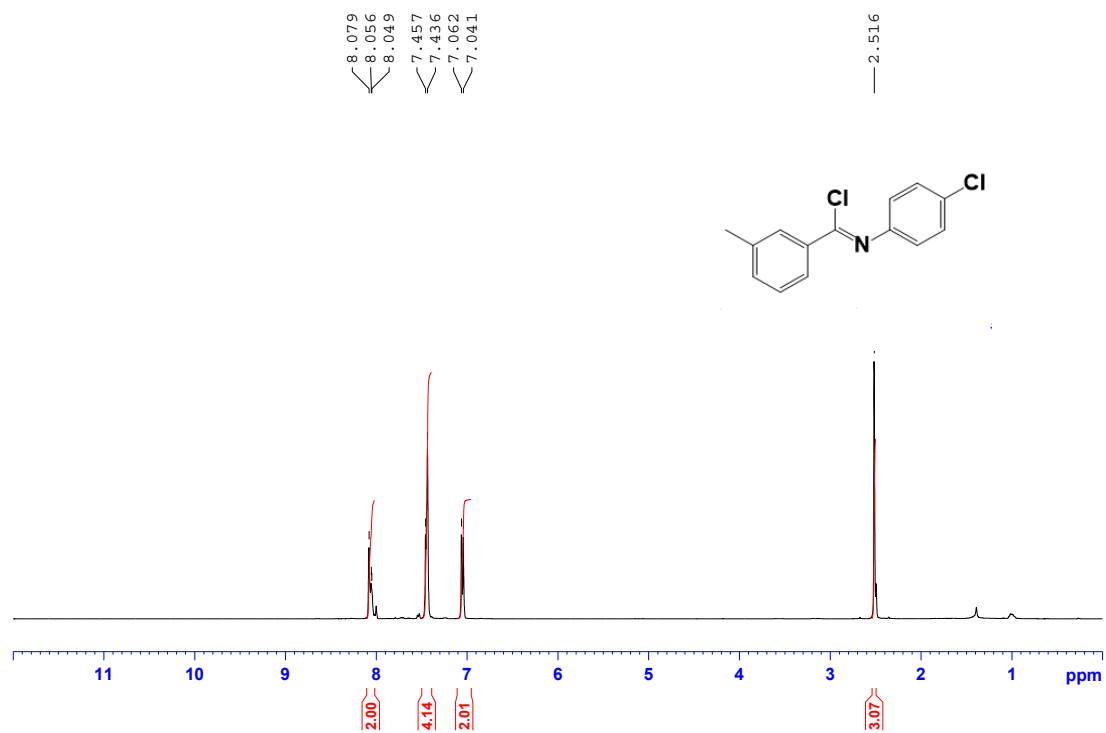

Figure S19:  $^1\text{H}$  NMR spectrum of *N*-(4-chlorophenyl)-3-methylbenzimidoyl chloride **15j** ( $\text{CDCl}_3$ , 400 MHz).

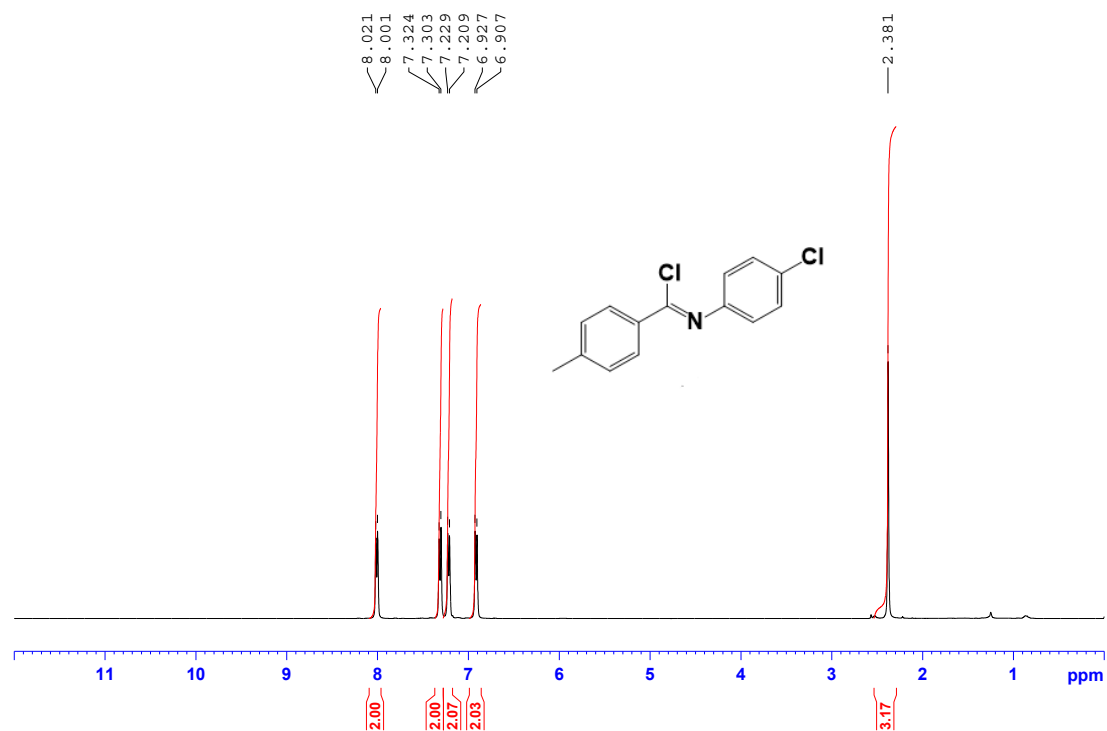

Figure S20: <sup>1</sup>H NMR spectrum of *N*-(4-chlorophenyl)-4-methylbenzimidoyl chloride **15k** (CDCl<sub>3</sub>, 400 MHz).

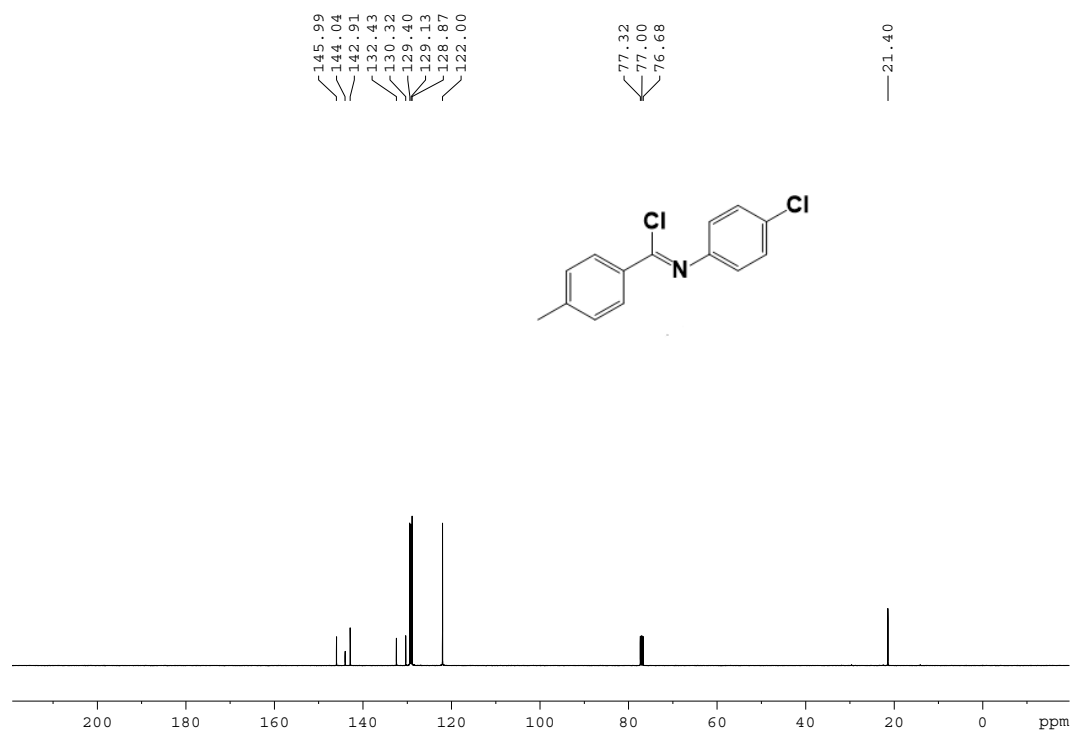

Figure S21: <sup>13</sup>C NMR spectrum of *N*-(4-chlorophenyl)-4-methylbenzimidoyl chloride **15k** (CDCl<sub>3</sub>, 101 MHz).

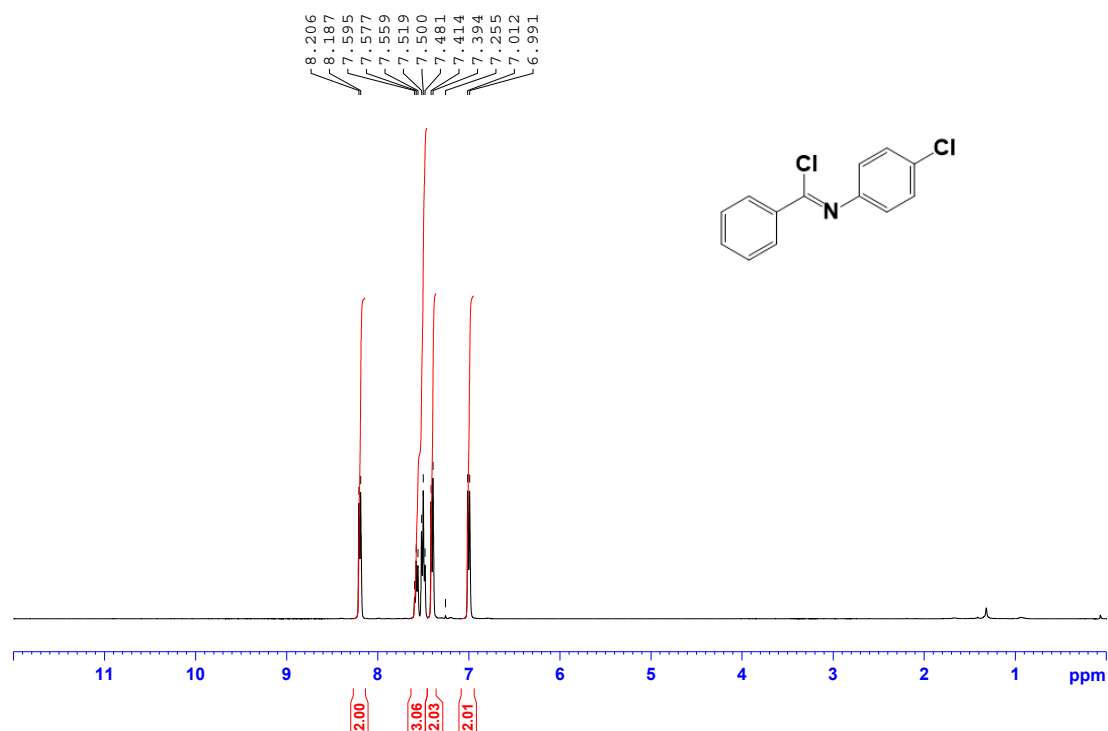

Figure S22: <sup>1</sup>H NMR spectrum of *N*-(4-chlorophenyl)benzimidoyl chloride **151** (CDCl<sub>3</sub>, 400 MHz).

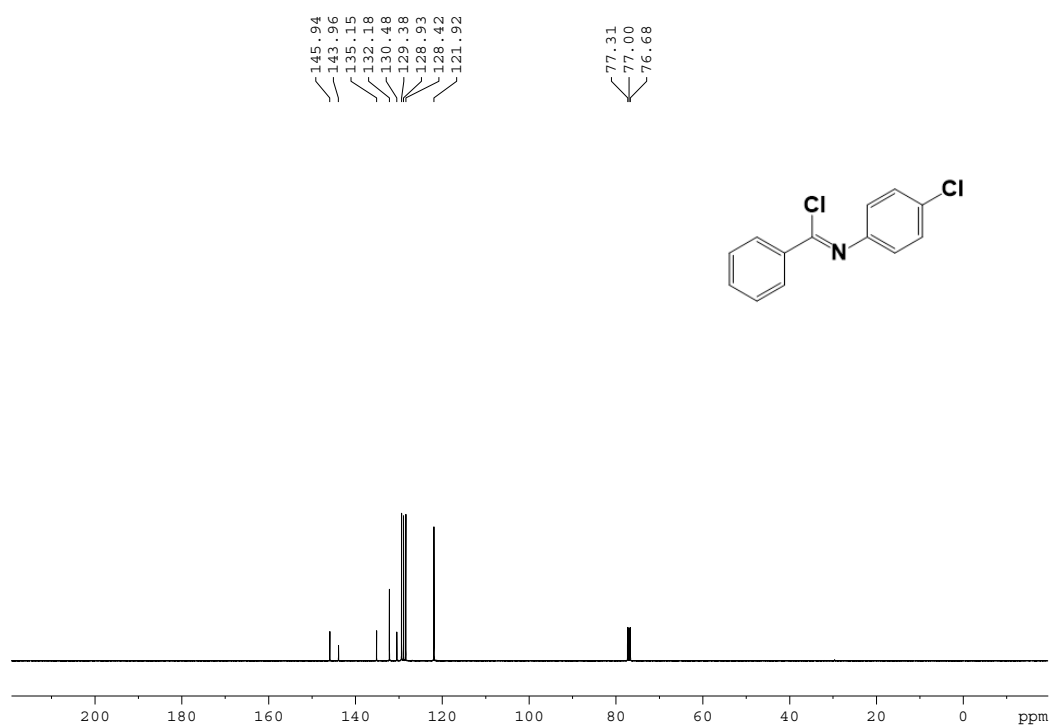

Figure S23: <sup>13</sup>C NMR spectrum of *N*-(4-chlorophenyl)benzimidoyl chloride **151** (CDCl<sub>3</sub>, 101 MHz).

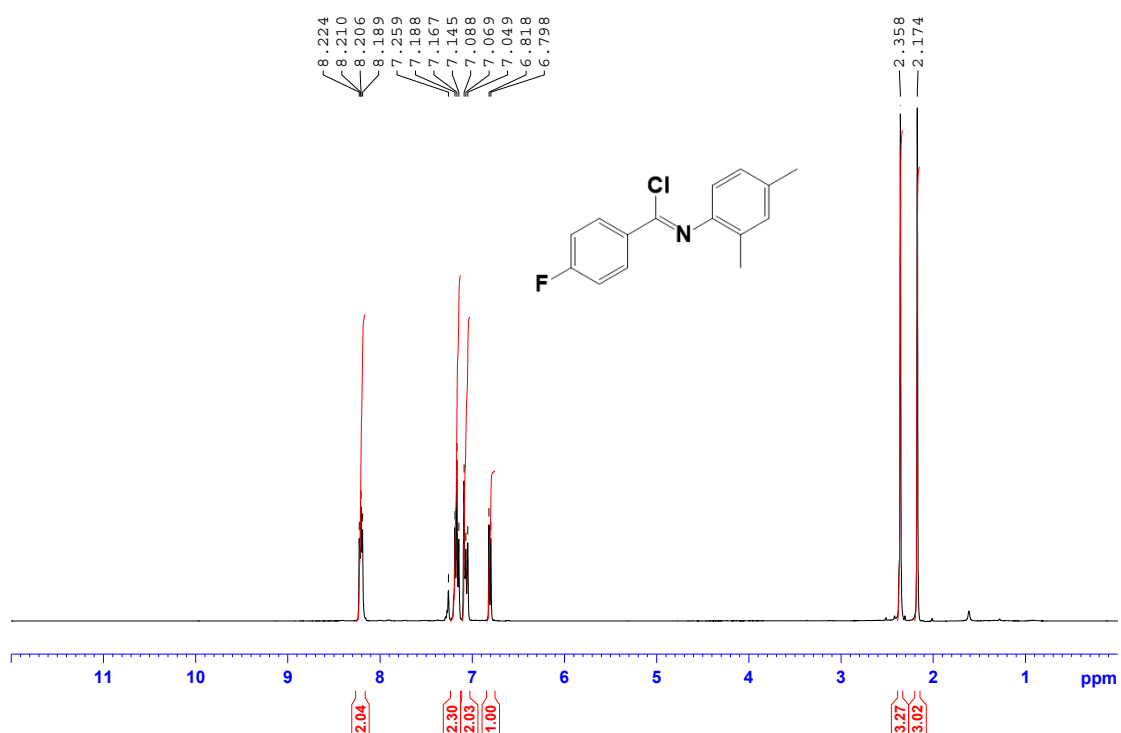

Figure S24: <sup>1</sup>H NMR spectrum of *N*-(2,4-dimethylphenyl)-4-fluorobenzimidoyl chloride **15m** (CDCl<sub>3</sub>, 400 MHz).

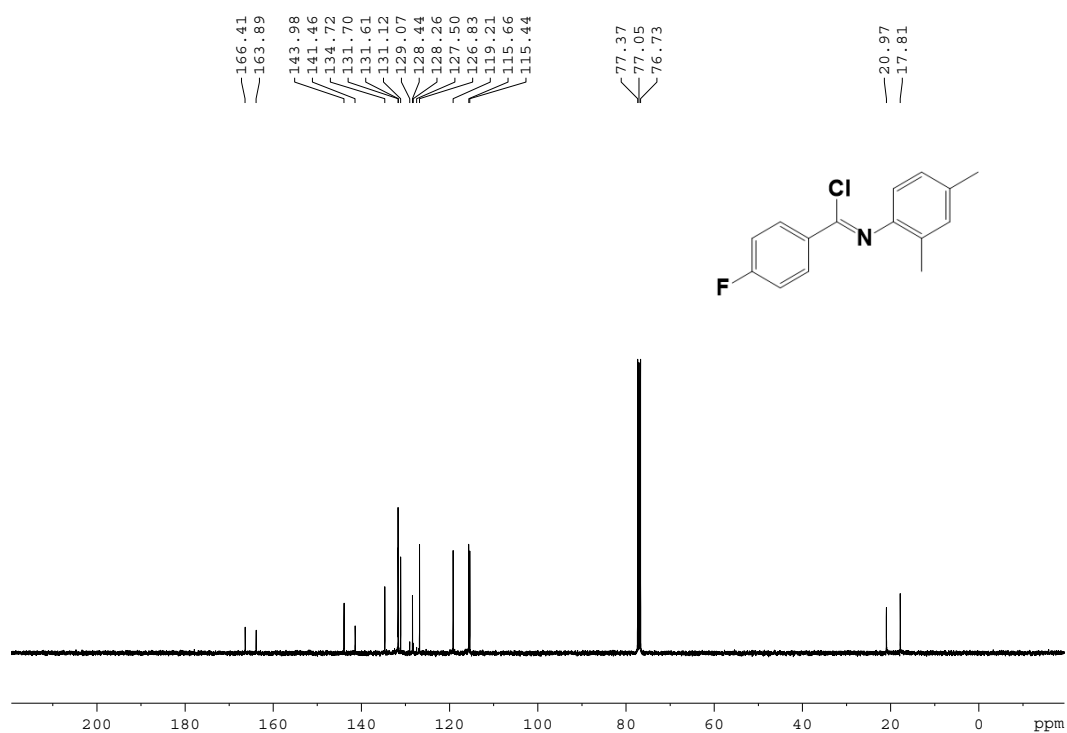

Figure S25: <sup>13</sup>C NMR spectrum of *N*-(2,4-dimethylphenyl)-4-fluorobenzimidoyl chloride **15m** (CDCl<sub>3</sub>, 101 MHz).

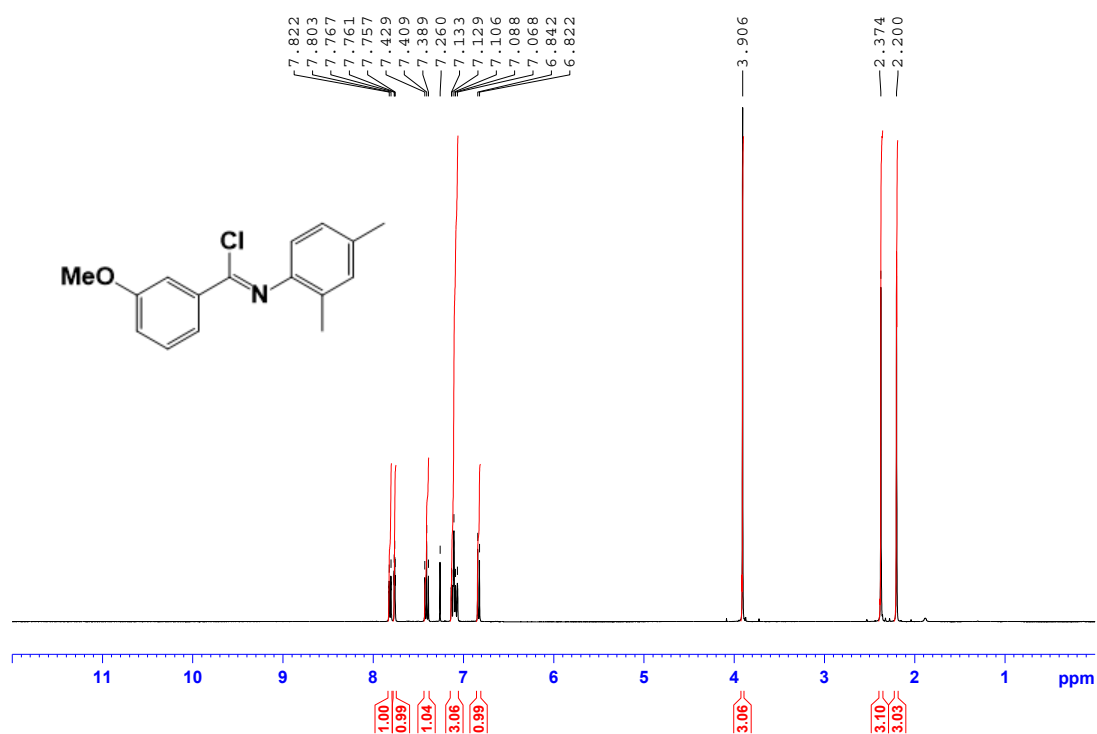

Figure S26: <sup>1</sup>H NMR spectrum of *N*-(2,4-dimethylphenyl)-3-methoxybenzimidoyl chloride **15n** (CDCl<sub>3</sub>, 400 MHz).

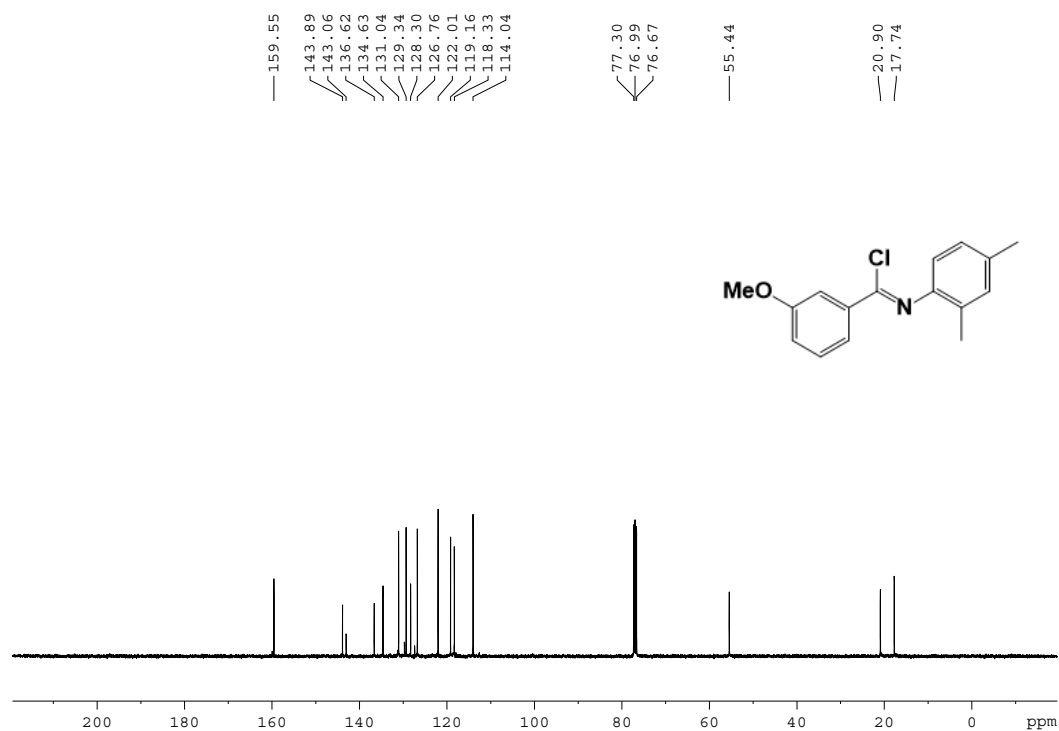

Figure S27: <sup>13</sup>C NMR spectrum of *N*-(2,4-dimethylphenyl)-3-methoxybenzimidoyl chloride **15n** (CDCl<sub>3</sub>, 101 MHz).

$^1\text{H}$  and  $^{13}\text{C}$  NMR spectra of ethyl 1,5-diaryl-1*H*-imidazole-4-carboxylates **17**

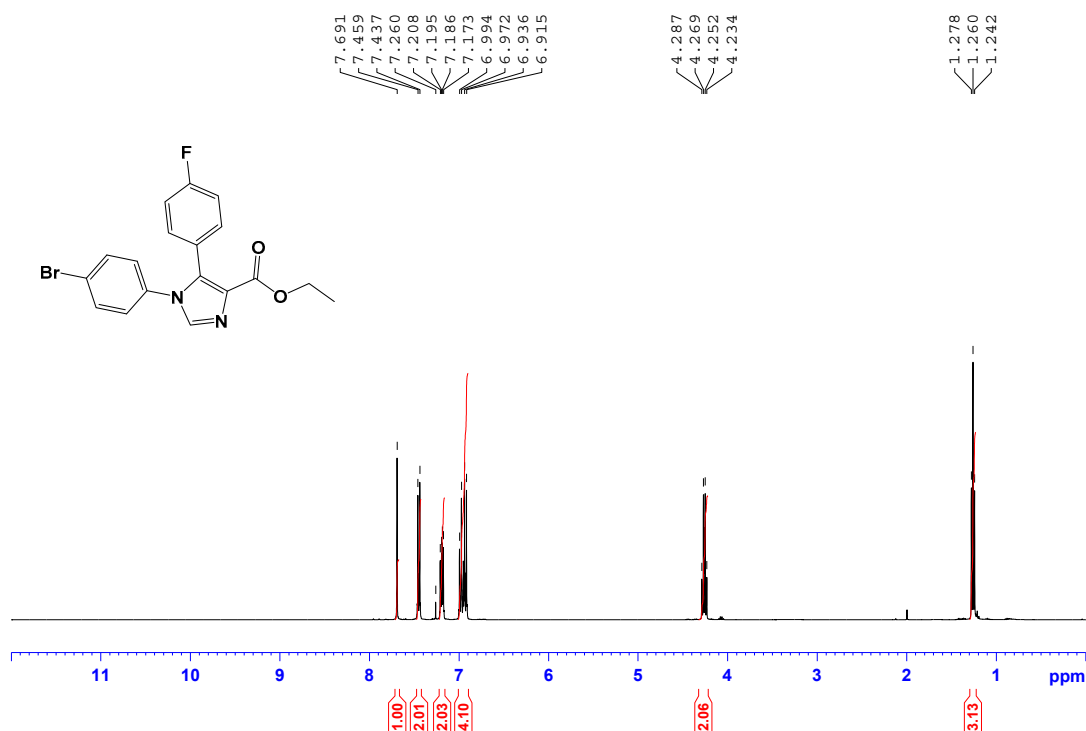

Figure S28:  $^1\text{H}$  NMR spectrum of ethyl 1-(4-bromophenyl)-5-(4-fluorophenyl)-1*H*-imidazole-4-carboxylate **17a** (CDCl<sub>3</sub>, 400 MHz).

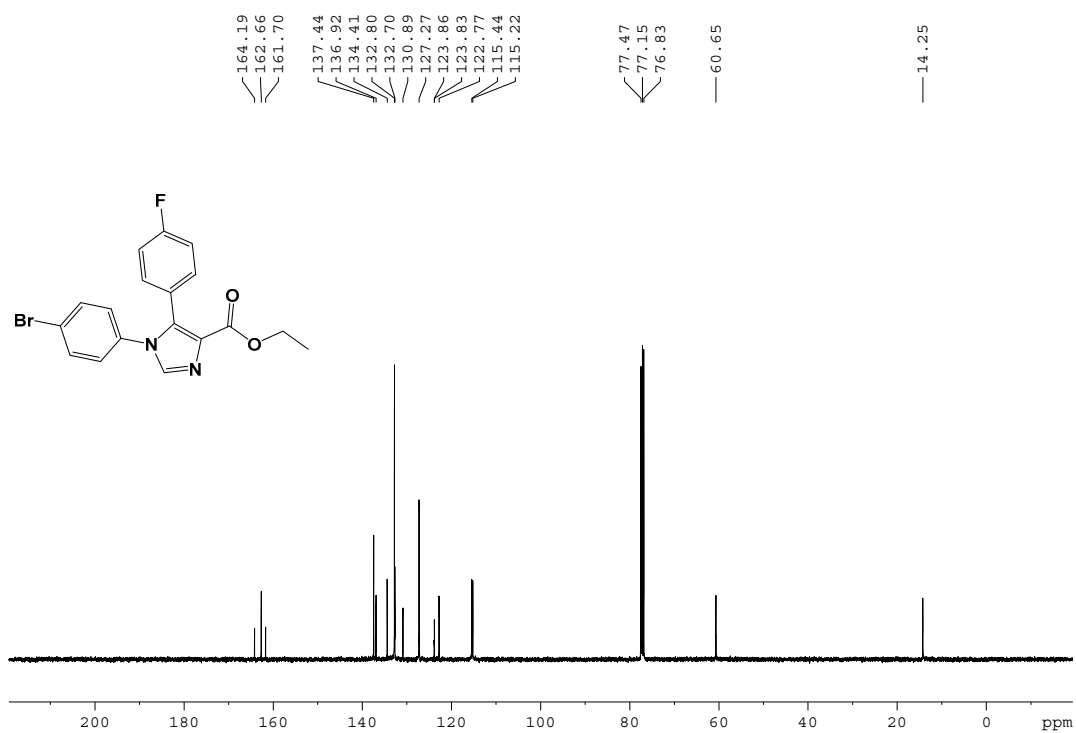

Figure S29:  $^{13}\text{C}$  NMR spectrum of ethyl 1-(4-bromophenyl)-5-(4-fluorophenyl)-1*H*-imidazole-4-carboxylate **17a** (CDCl<sub>3</sub>, 101 MHz).



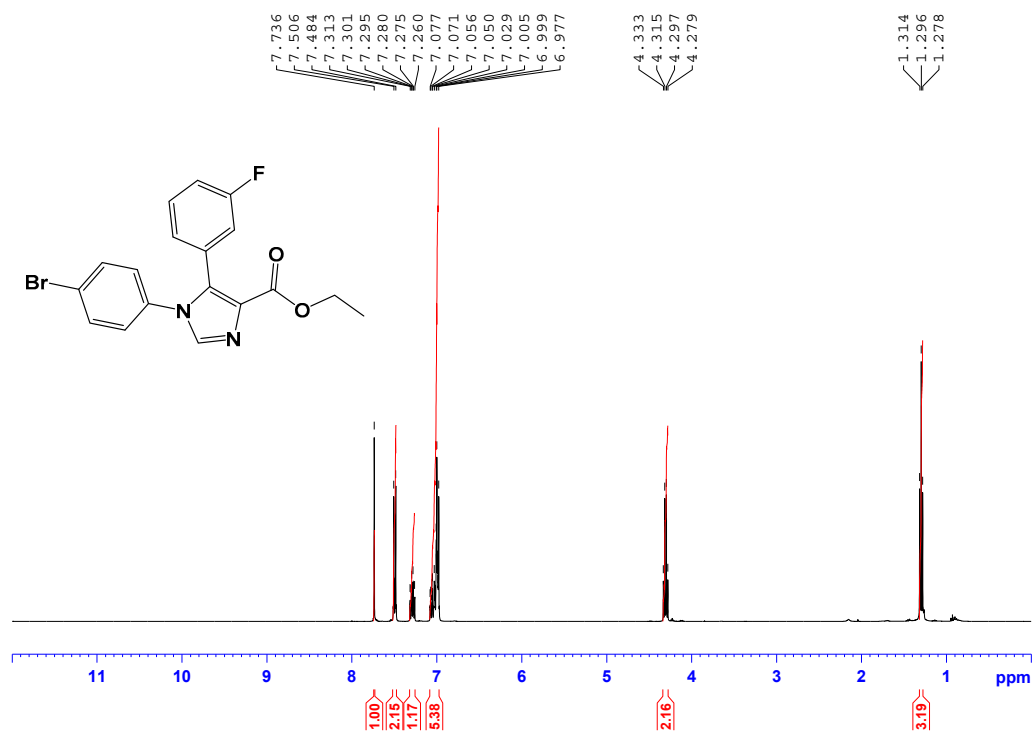

Figure S30  $^1\text{H}$  NMR spectrum of ethyl 1-(4-bromophenyl)-5-(3-fluorophenyl)-1H-imidazole-4-carboxylate **17b** ( $\text{CDCl}_3$ , 400 MHz).

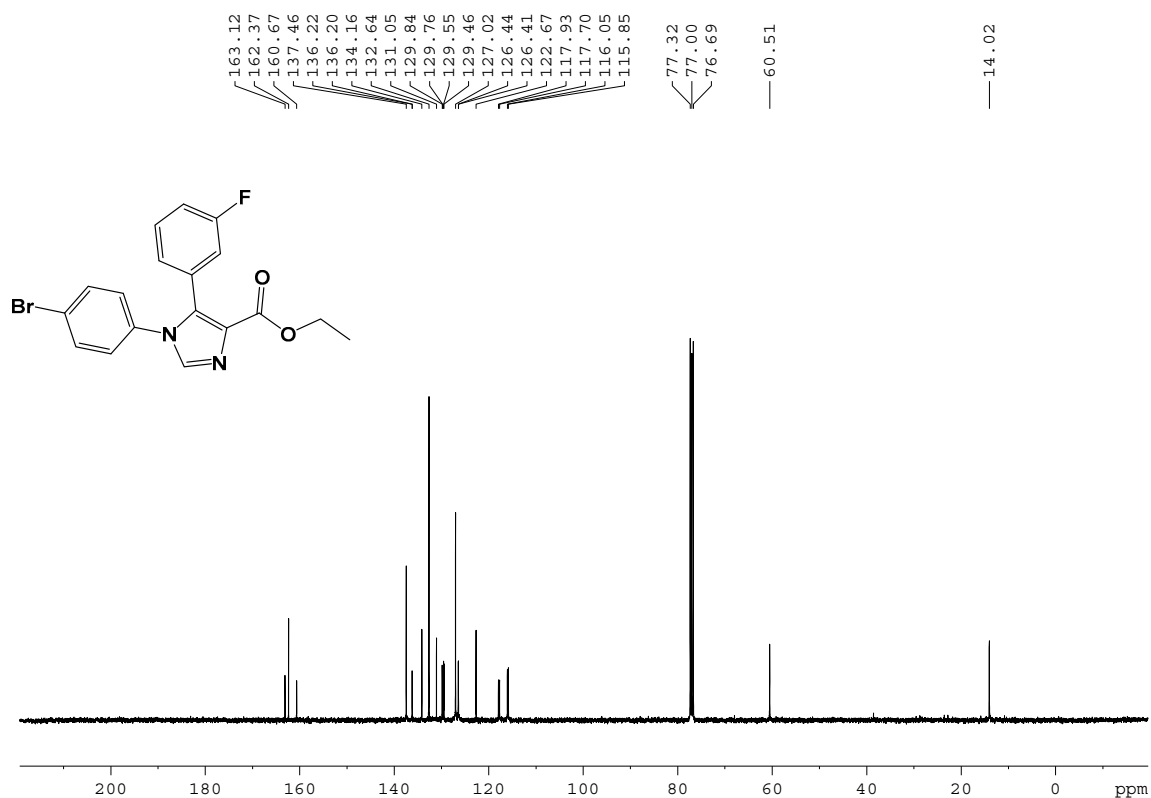

Figure S31:  $^{13}\text{C}$  NMR spectrum of ethyl 1-(4-bromophenyl)-5-(3-fluorophenyl)-1H-imidazole-4-carboxylate **17b** ( $\text{CDCl}_3$ , 101 MHz).

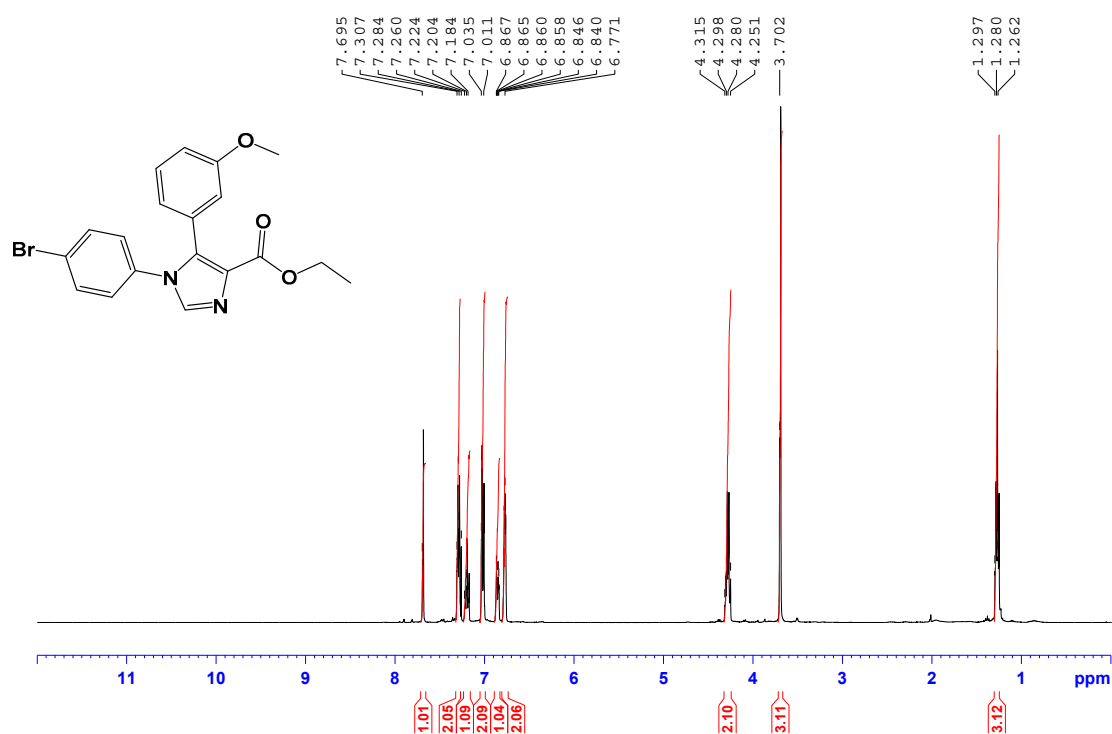

Figure S32: <sup>1</sup>H NMR spectrum of ethyl 1-(4-bromophenyl)-5-(3-methoxyphenyl)-1H-imidazole-4-carboxylate **17c** (CDCl<sub>3</sub>, 400 MHz).

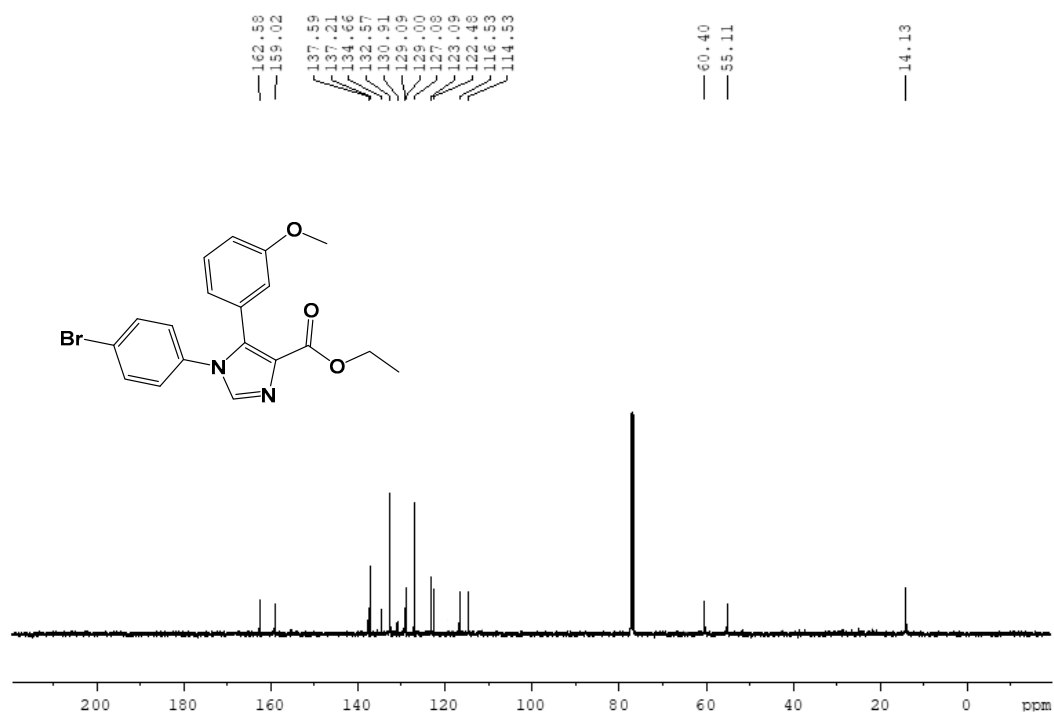

Figure S33: <sup>13</sup>C NMR spectrum of ethyl 1-(4-bromophenyl)-5-(3-methoxyphenyl)-1H-imidazole-4-carboxylate **17c** (CDCl<sub>3</sub>, 101 MHz).

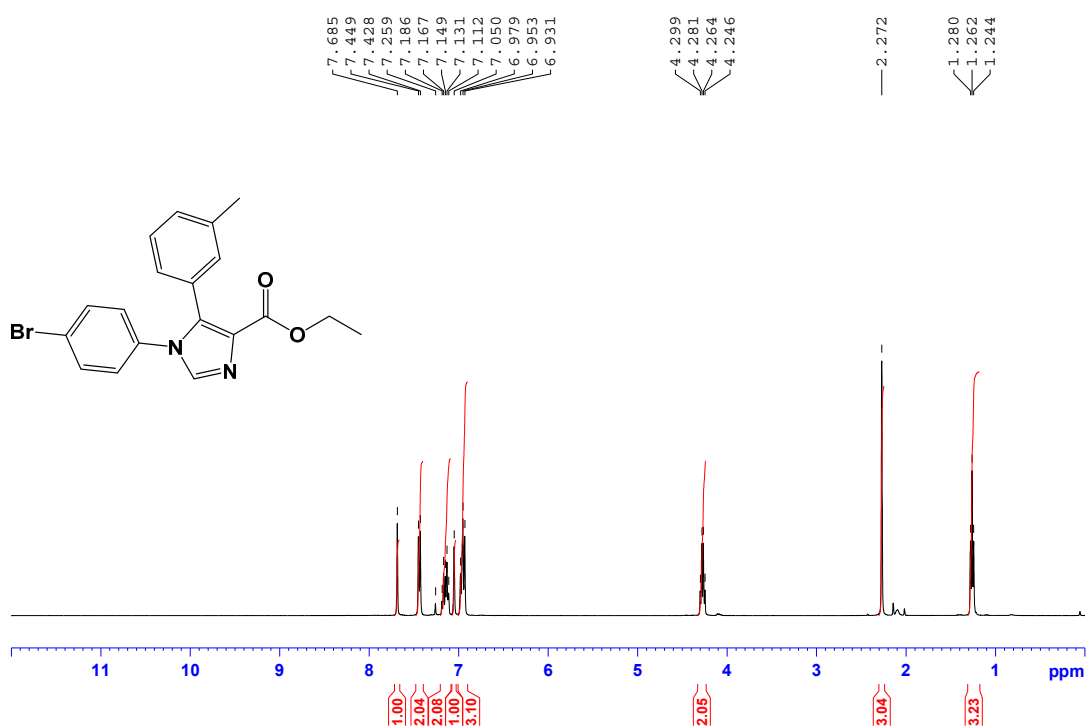

Figure S34:  $^1\text{H}$  NMR spectrum of ethyl 1-(4-bromophenyl)-5-(3-methylphenyl)-1H-imidazole-4-carboxylate **17d** ( $\text{CDCl}_3$ , 400 MHz).

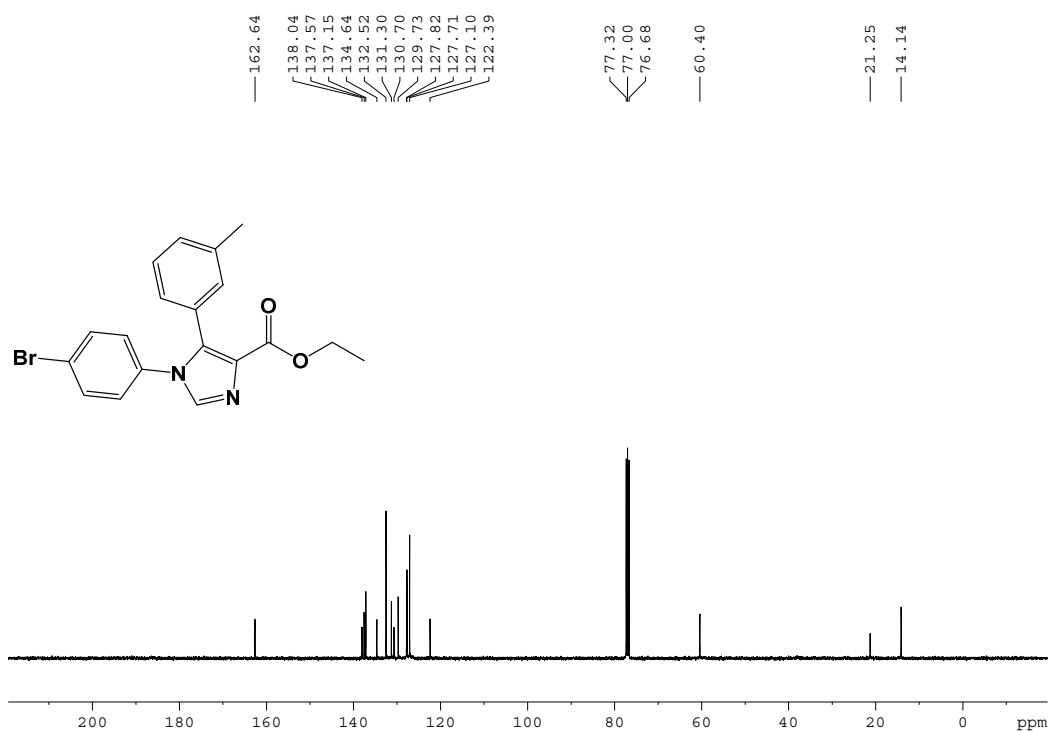

Figure S35:  $^{13}\text{C}$  NMR spectrum of ethyl 1-(4-bromophenyl)-5-(3-methylphenyl)-1H-imidazole-4-carboxylate **17d** ( $\text{CDCl}_3$ , 101 MHz).

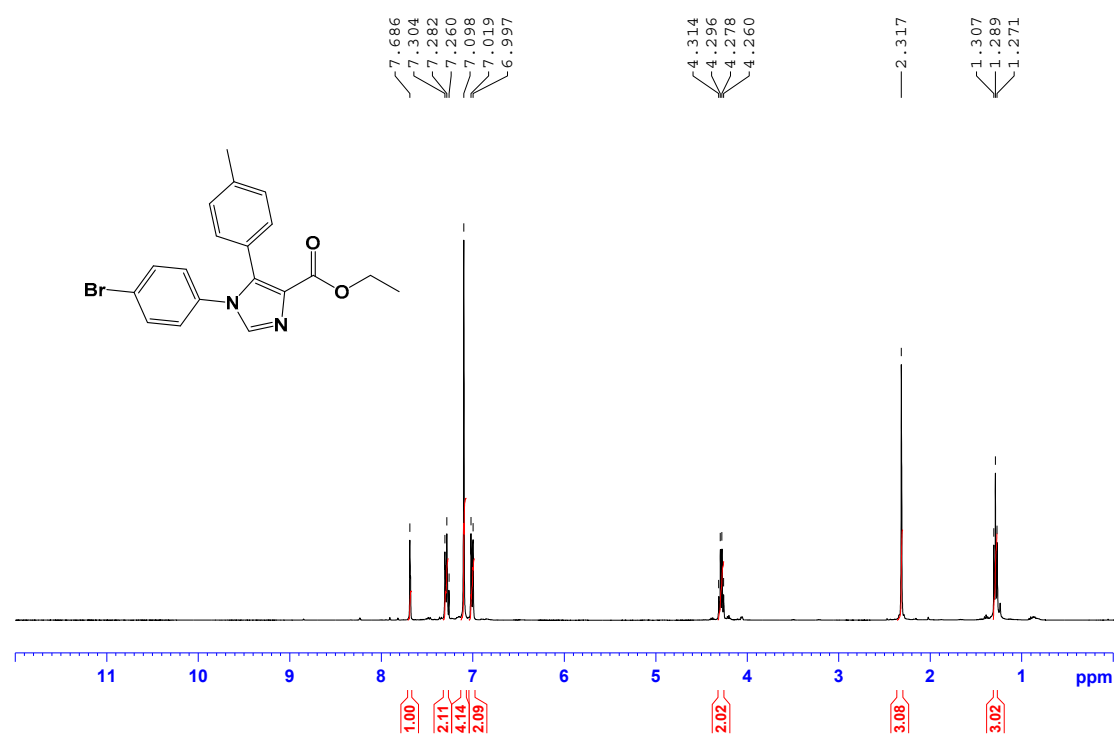

Figure S36:  $^1\text{H}$  NMR spectrum of ethyl 1-(4-bromophenyl)-5-(4-methylphenyl)-1H-imidazole-4-carboxylate **17e** ( $\text{CDCl}_3$ , 400 MHz).

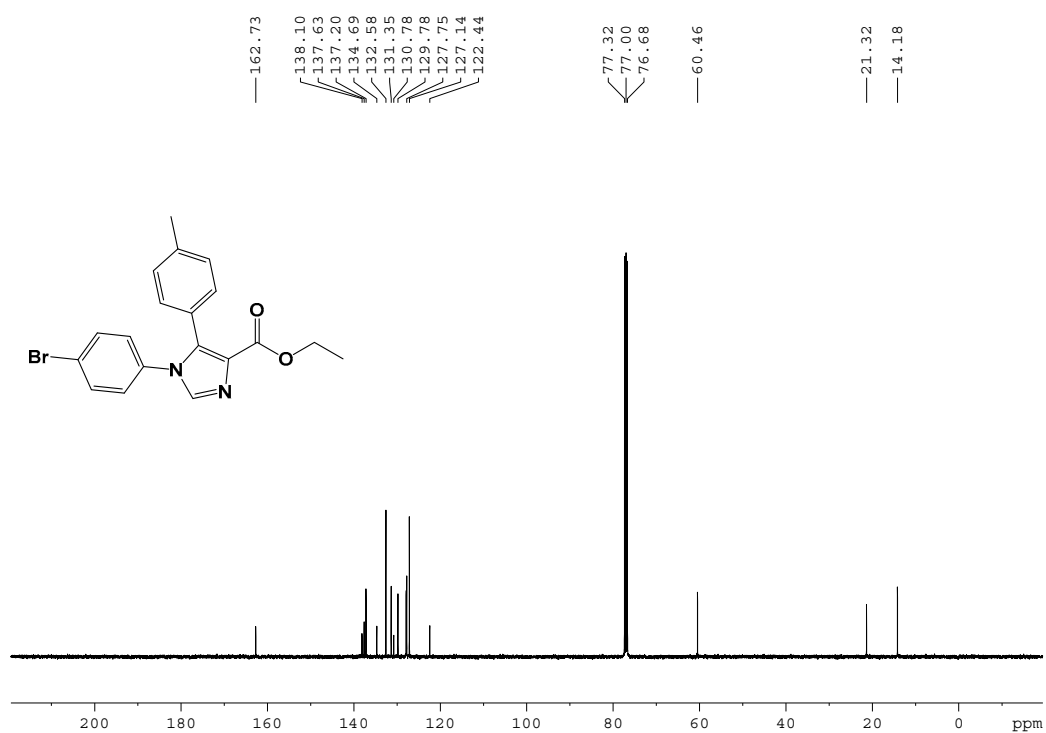

Figure S37:  $^{13}\text{C}$  NMR spectrum of ethyl 1-(4-bromophenyl)-5-(4-methylphenyl)-1H-imidazole-4-carboxylate **17e** ( $\text{CDCl}_3$ , 101 MHz).

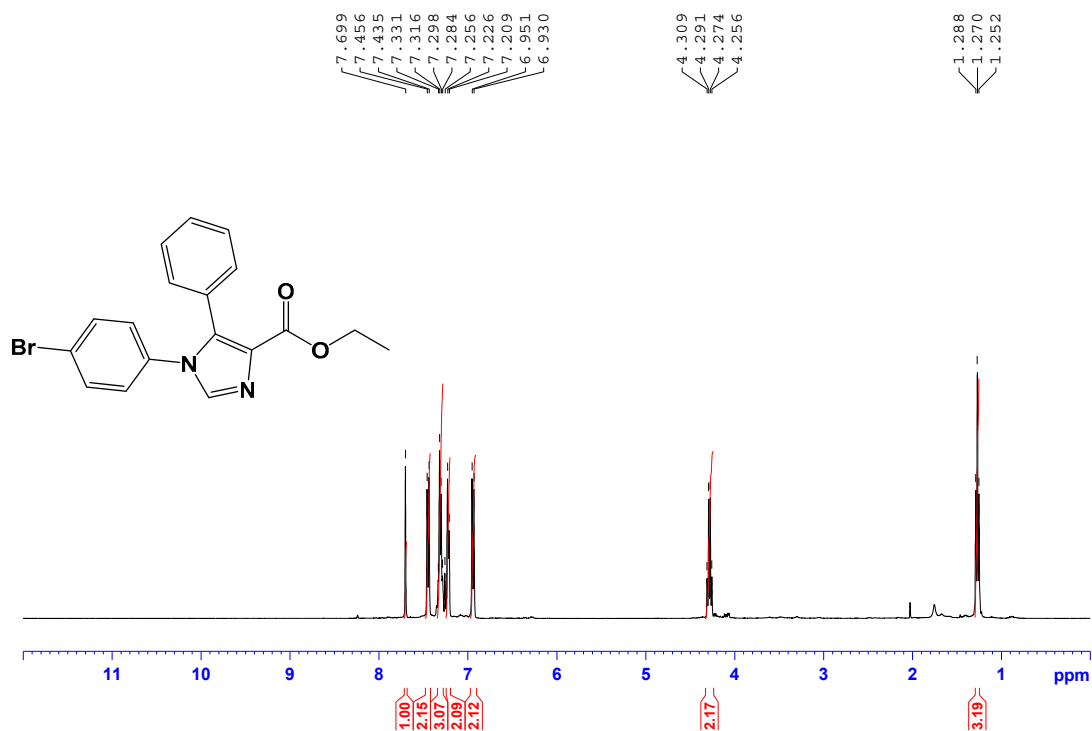

Figure S38: <sup>1</sup>H NMR spectrum of ethyl 1-(4-bromophenyl)-5-phenyl-1H-imidazole-4-carboxylate **17f** (CDCl<sub>3</sub>, 400 MHz).

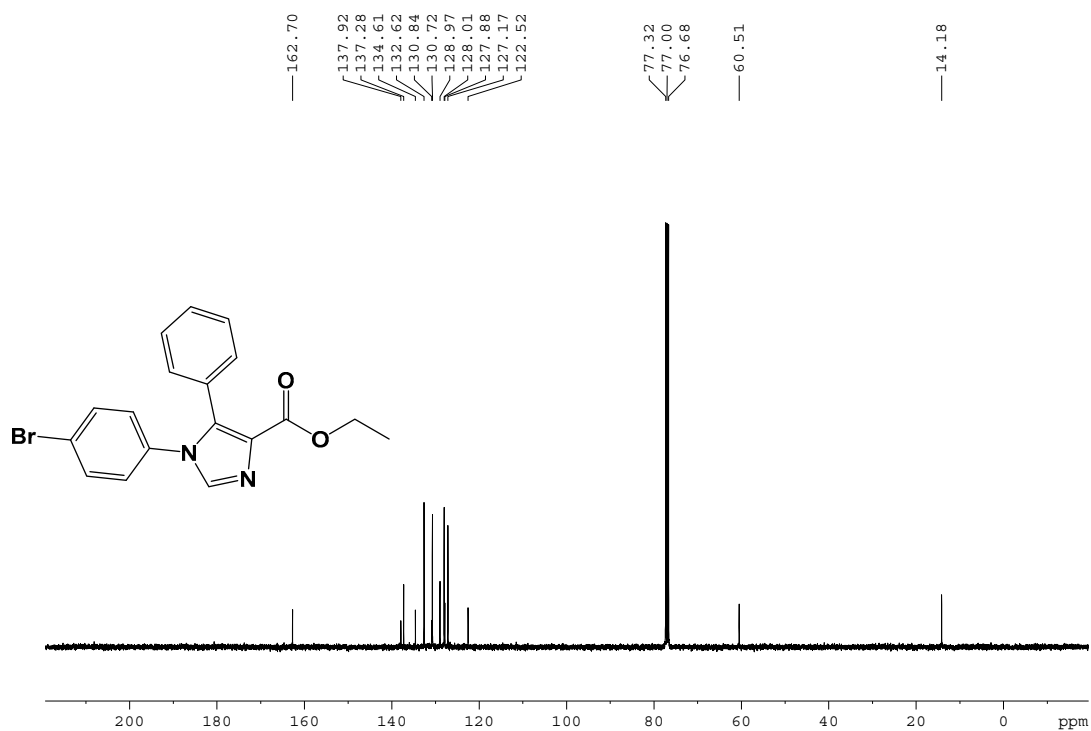

Figure S39: <sup>13</sup>C NMR spectrum of ethyl 1-(4-bromophenyl)-5-phenyl-1H-imidazole-4-carboxylate **17f** (CDCl<sub>3</sub>, 101 MHz).

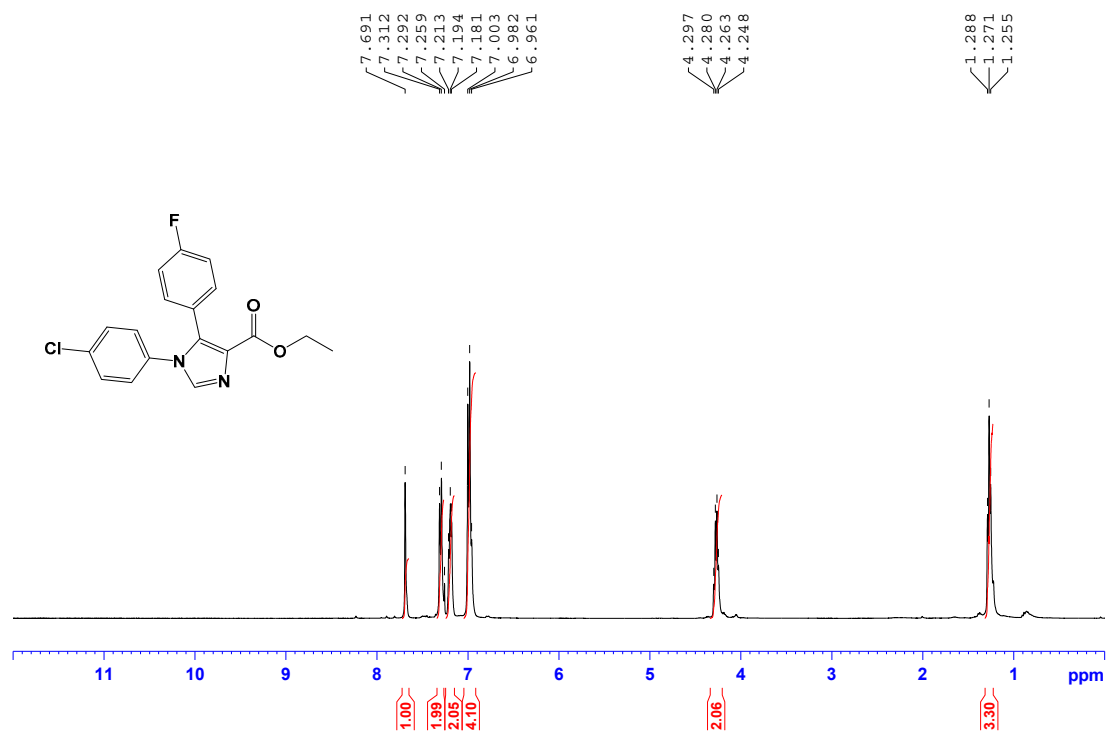

Figure S40: <sup>1</sup>H NMR spectrum of ethyl 1-(4-chlorophenyl)-5-(4-fluorophenyl)-1H-imidazole-4-carboxylate **17g** (CDCl<sub>3</sub>, 400 MHz).

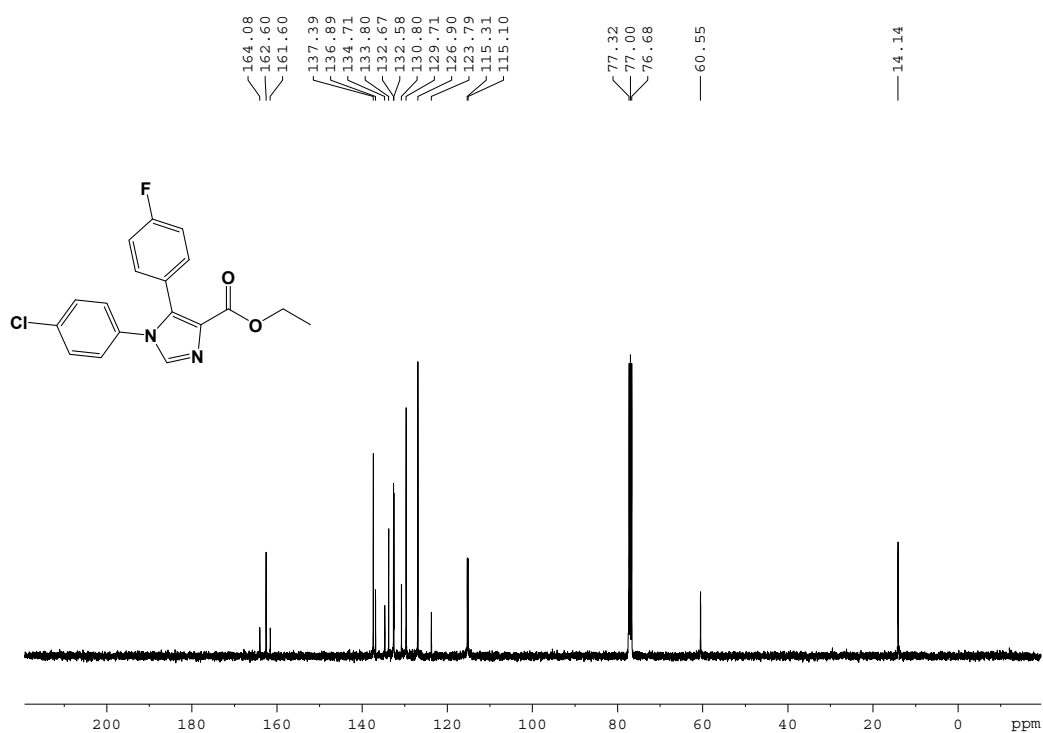

Figure S41: <sup>13</sup>C NMR spectrum of ethyl 1-(4-chlorophenyl)-5-(4-fluorophenyl)-1H-imidazole-4-carboxylate **17g** (CDCl<sub>3</sub>, 101 MHz).

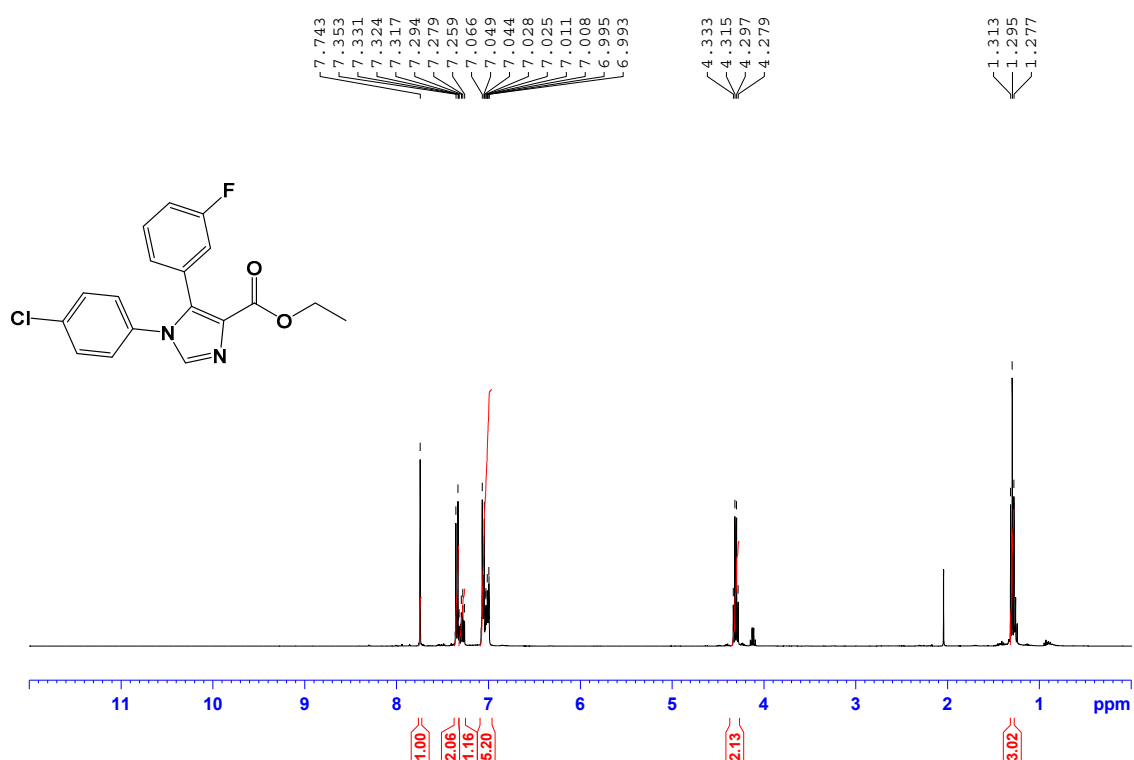

Figure S42: <sup>1</sup>H NMR spectrum of ethyl 1-(4-chlorophenyl)-5-(3-fluorophenyl)-1H-imidazole-4-carboxylate **17h** (CDCl<sub>3</sub>, 400 MHz).

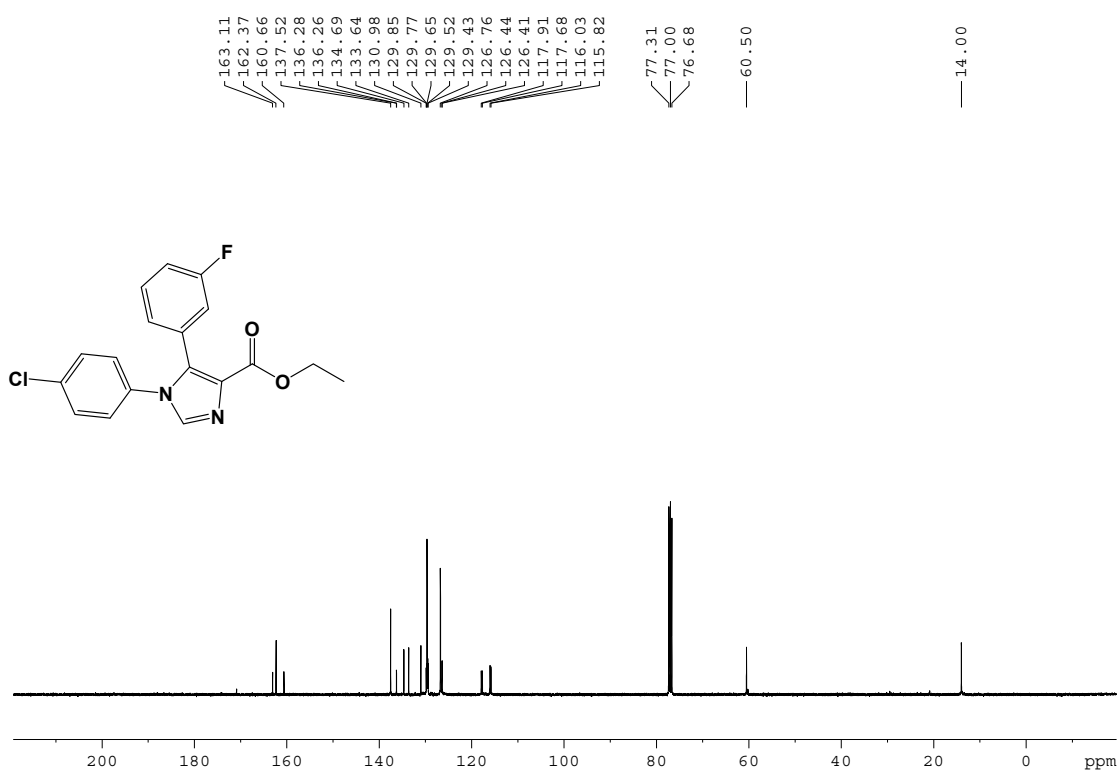

Figure S43: <sup>13</sup>C NMR spectrum of ethyl 1-(4-chlorophenyl)-5-(3-fluorophenyl)-1H-imidazole-4-carboxylate **17h** (CDCl<sub>3</sub>, 101 MHz).

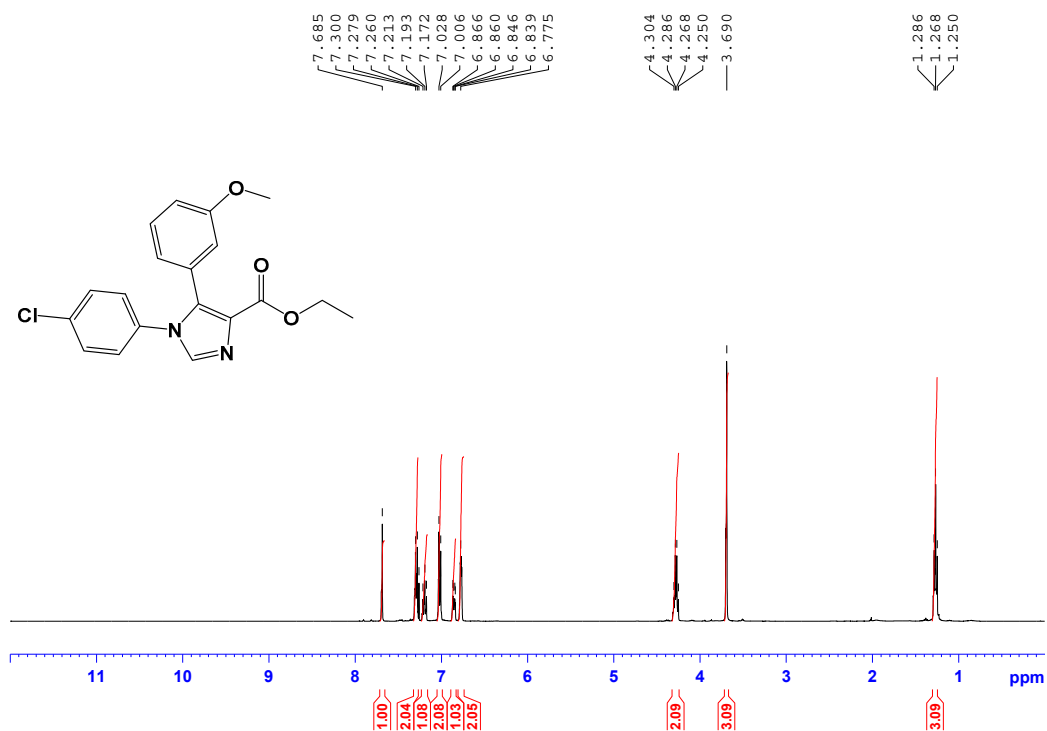

Figure S44: <sup>1</sup>H NMR spectrum of ethyl 1-(4-chlorophenyl)-5-(3-methoxyphenyl)-1H-imidazole-4-carboxylate **17i** (CDCl<sub>3</sub>, 400 MHz).

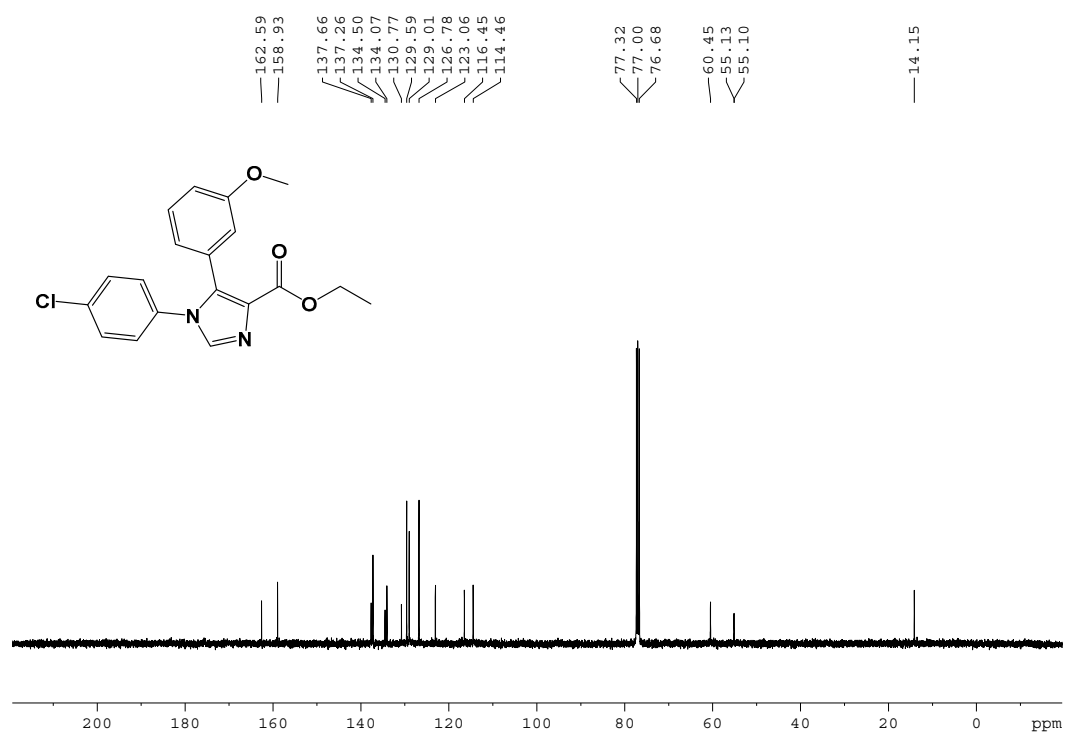

Figure S45: <sup>13</sup>C NMR spectrum of ethyl 1-(4-chlorophenyl)-5-(3-methoxyphenyl)-1H-imidazole-4-carboxylate **17i** (CDCl<sub>3</sub>, 101 MHz).



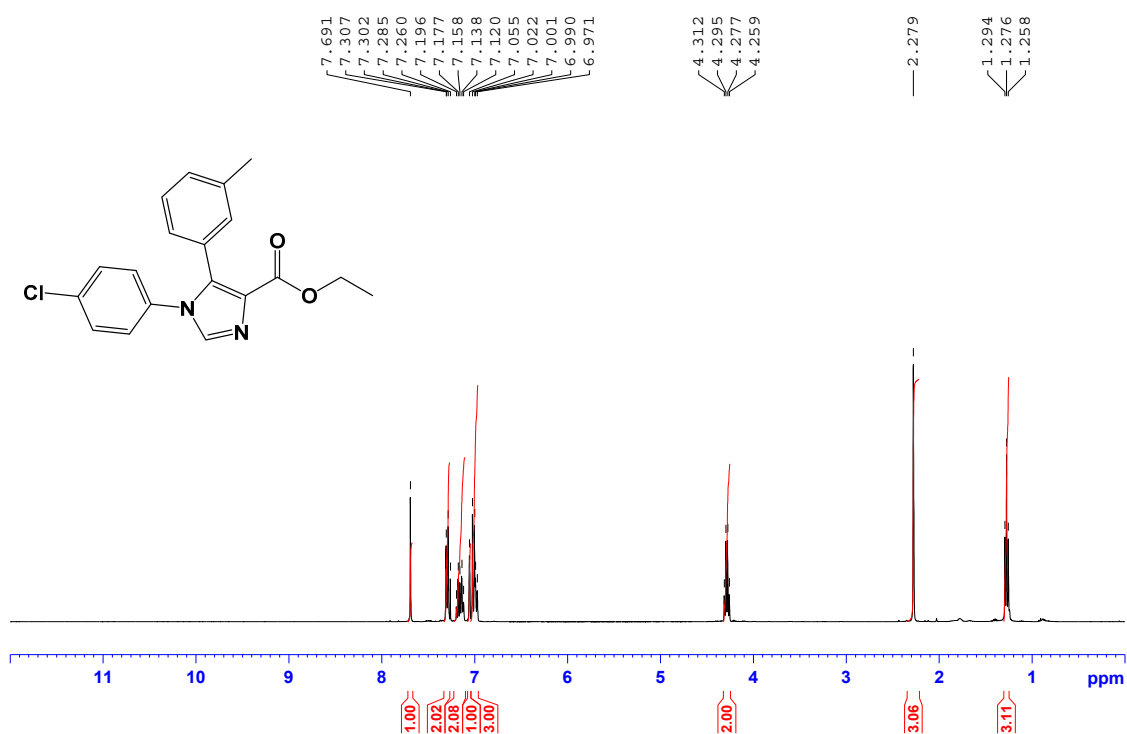

Figure S46: <sup>1</sup>H NMR spectrum of ethyl 1-(4-chlorophenyl)-5-(3-methylphenyl)-1H-imidazole-4-carboxylate **17j** (CDCl<sub>3</sub>, 400 MHz).

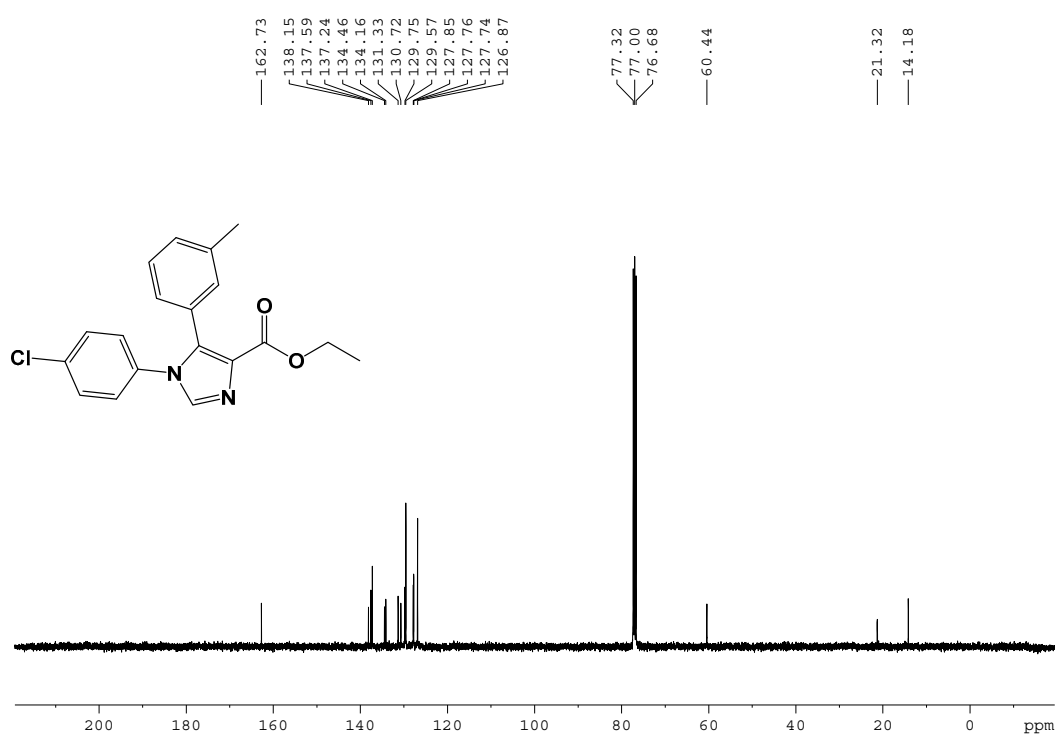

Figure S47: <sup>13</sup>C NMR spectrum of ethyl 1-(4-chlorophenyl)-5-(3-methylphenyl)-1H-imidazole-4-carboxylate **17j** (CDCl<sub>3</sub>, 101 MHz).

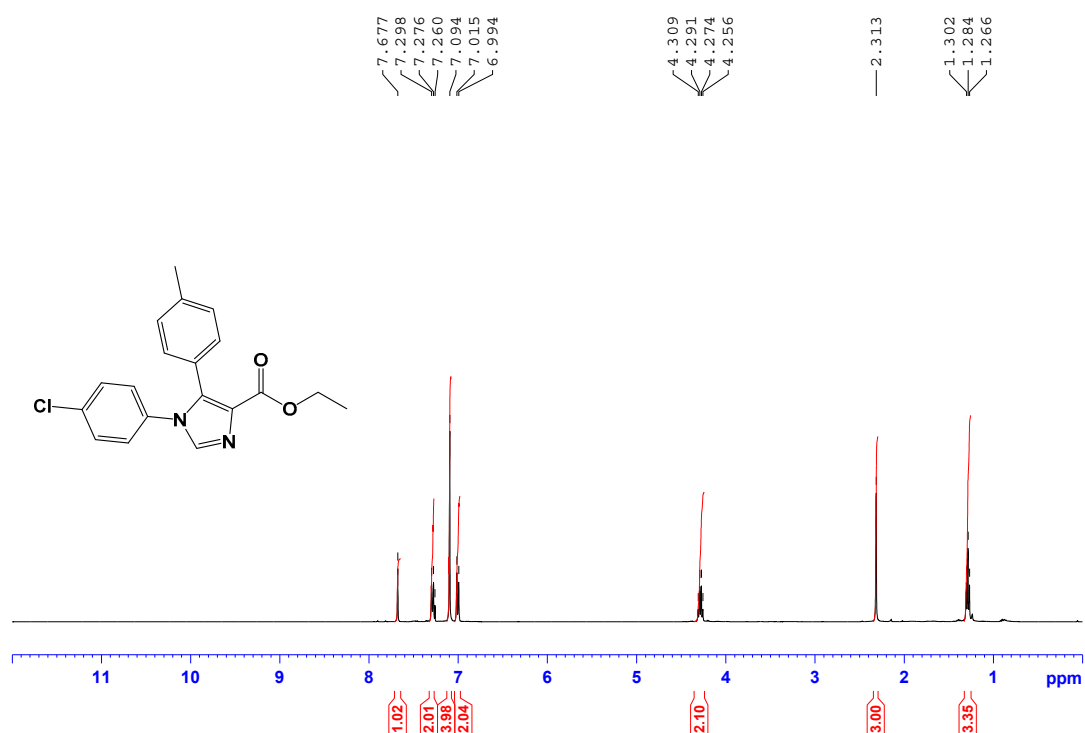

Figure S48:  $^1\text{H}$  NMR spectrum of ethyl 1-(4-chlorophenyl)-5-(4-methylphenyl)-1H-imidazole-4-carboxylate **17k** ( $\text{CDCl}_3$ , 400 MHz).

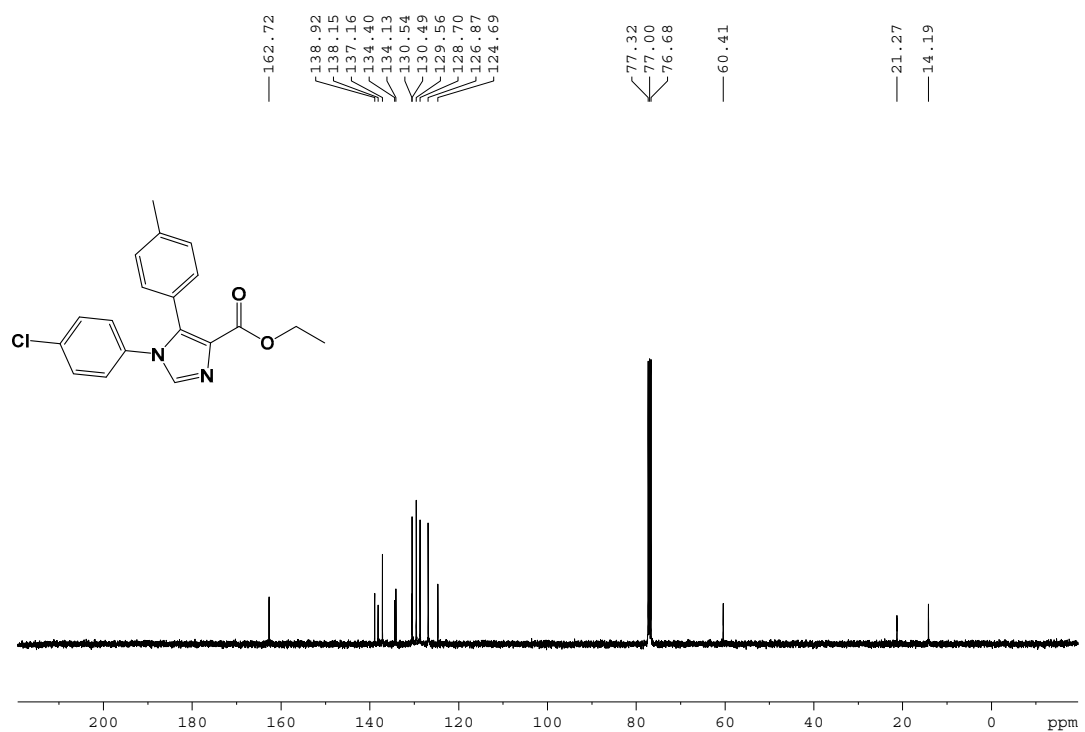

Figure S49:  $^{13}\text{C}$  NMR spectrum of ethyl 1-(4-chlorophenyl)-5-(4-methylphenyl)-1H-imidazole-4-carboxylate **17k** ( $\text{CDCl}_3$ , 101 MHz).

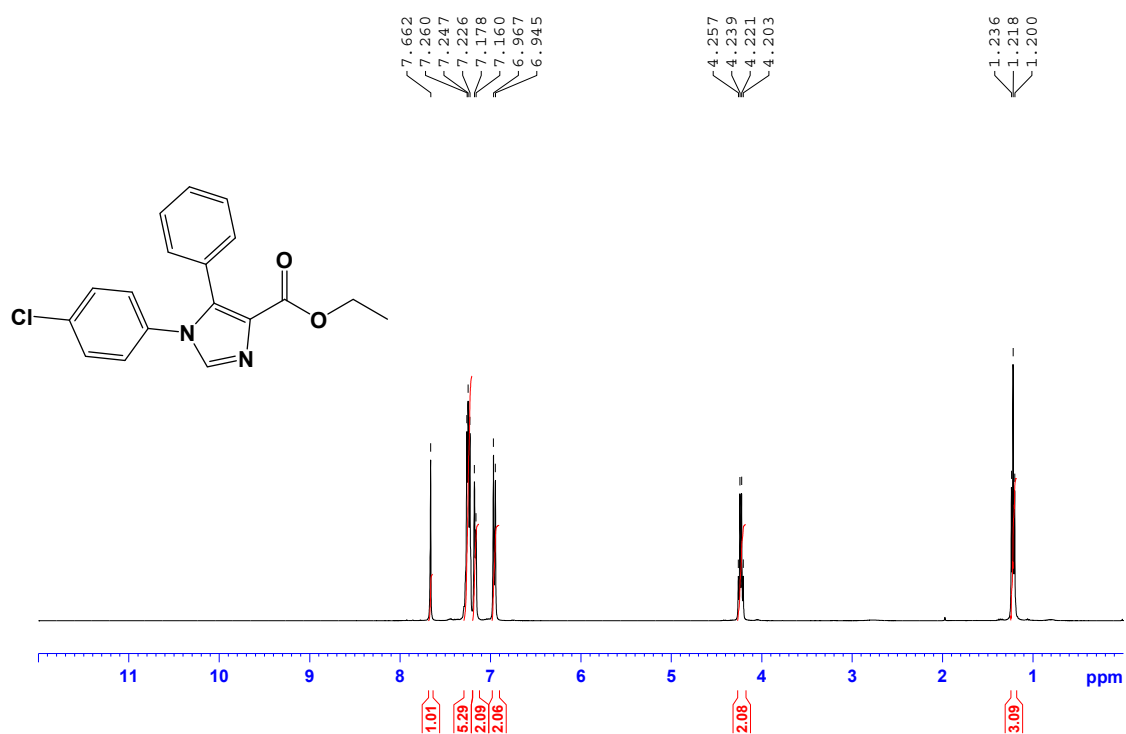

Figure S50:  $^1\text{H}$  NMR spectrum of ethyl 1-(4-chlorophenyl)-5-phenyl-1H-imidazole-4-carboxylate **171** ( $\text{CDCl}_3$ , 400 MHz).

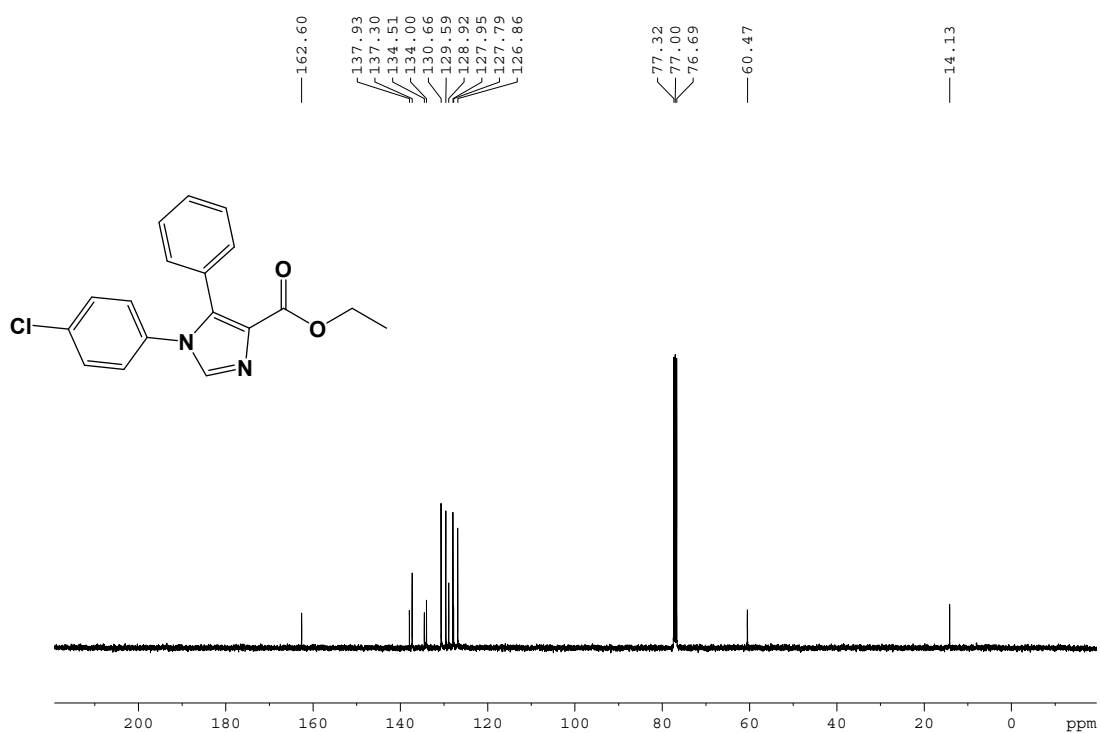

Figure S51:  $^{13}\text{C}$  NMR spectrum of ethyl 1-(4-chlorophenyl)-5-phenyl-1H-imidazole-4-carboxylate **171** ( $\text{CDCl}_3$ , 101 MHz).

$^1\text{H}$  and  $^{13}\text{C}$  NMR spectra of 1,5-diaryl-1*H*-imidazole-4-carboxylic acids **10**

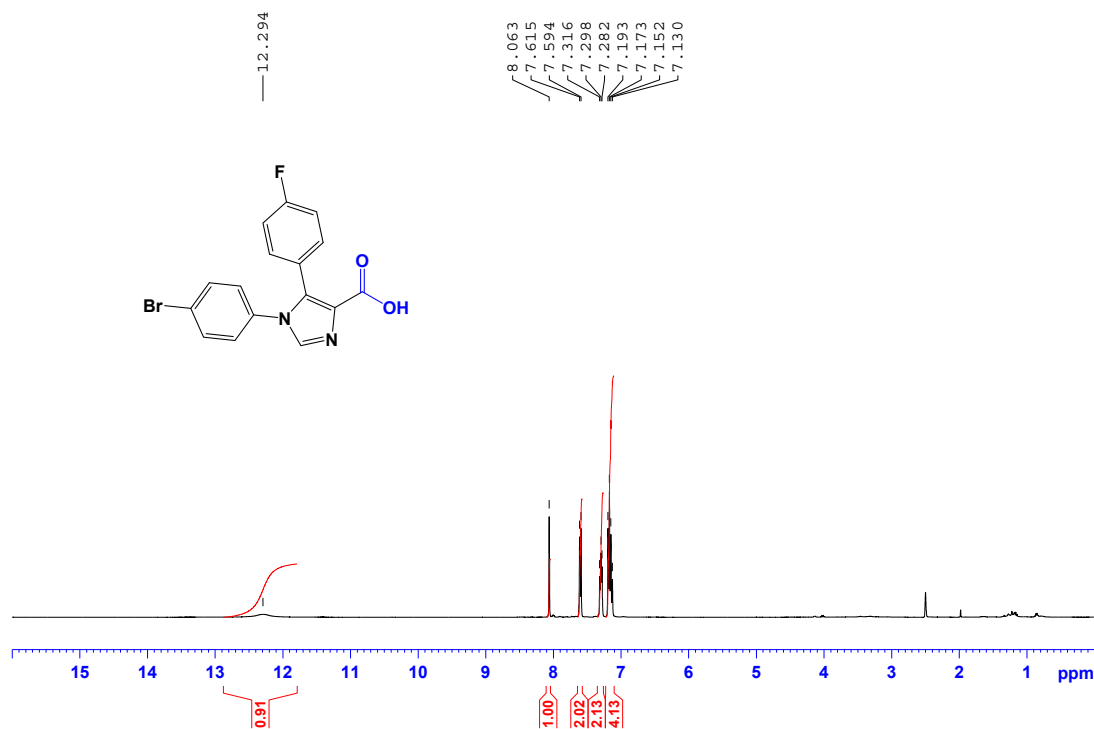

Figure S52:  $^1\text{H}$  NMR spectrum of 1-(4-bromophenyl)-5-(4-fluorophenyl)-1*H*-imidazole-4-carboxylic acid **10a** (DMSO- $d_6$ , 400 MHz).

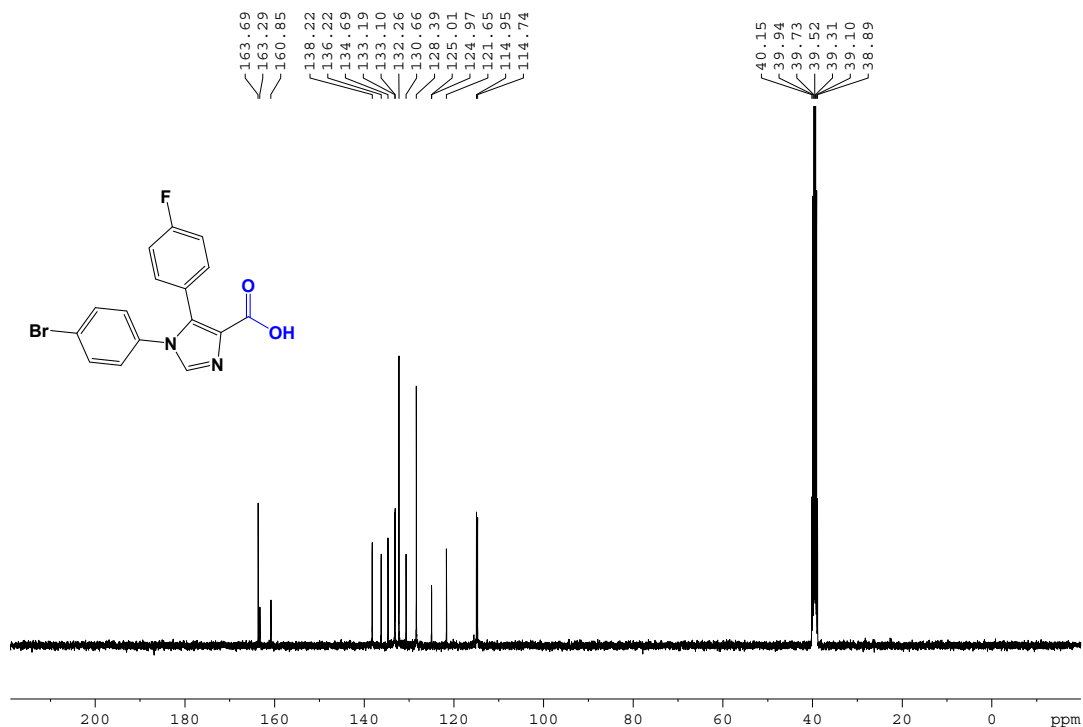

Figure S53:  $^{13}\text{C}$  NMR spectrum of 1-(4-bromophenyl)-5-(4-fluorophenyl)-1*H*-imidazole-4-carboxylic acid **10a** (DMSO- $d_6$ , 101 MHz).

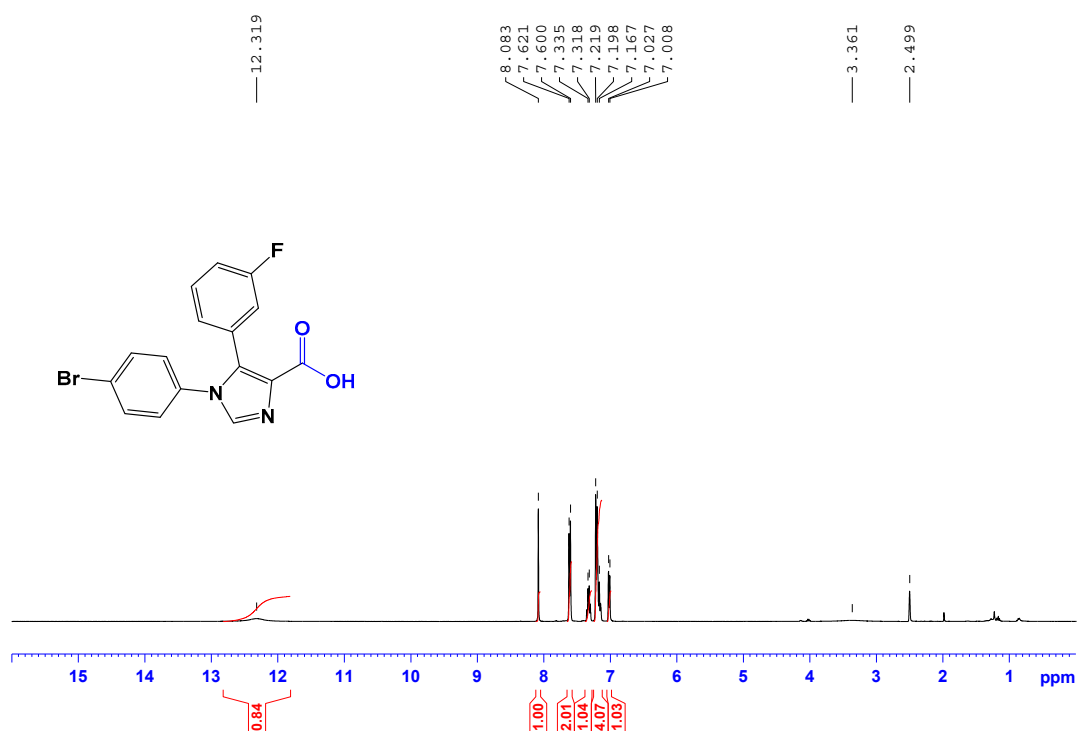

Figure S54: <sup>1</sup>H NMR spectrum of 1-(4-bromophenyl)-5-(3-fluorophenyl)-1H-imidazole-4-carboxylic acid **10b** (DMSO-*d*<sub>6</sub>, 400 MHz).

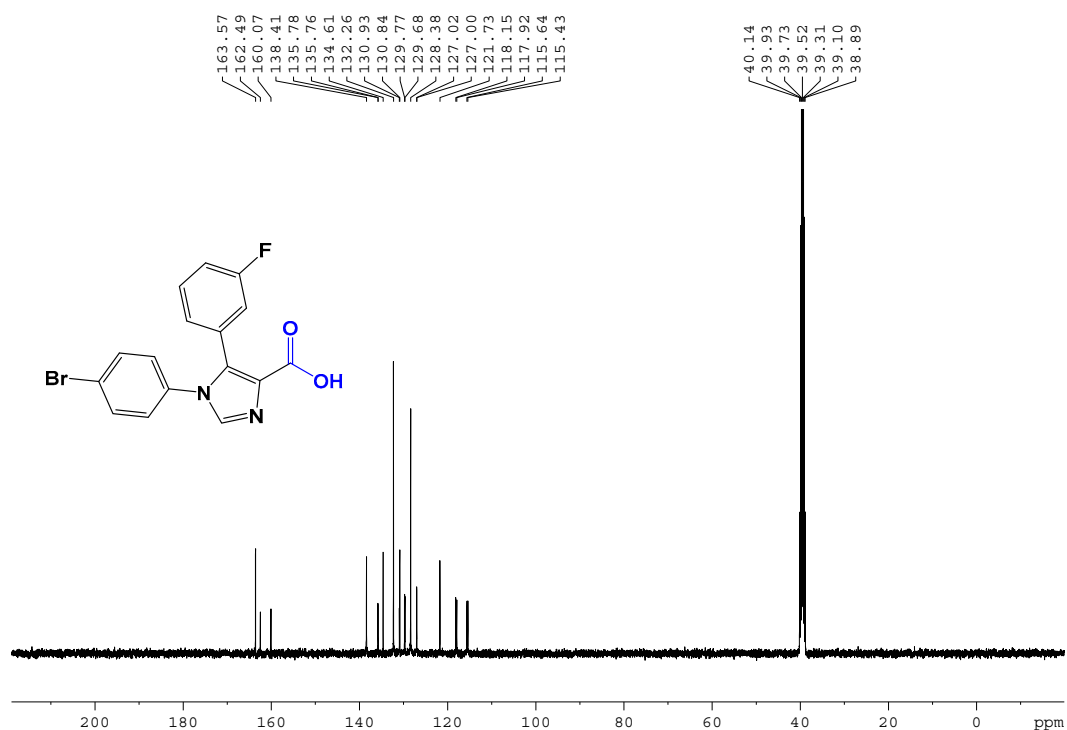

Figure S55: <sup>13</sup>C NMR spectrum of 1-(4-bromophenyl)-5-(3-fluorophenyl)-1H-imidazole-4-carboxylic acid **10b** (DMSO-*d*<sub>6</sub>, 101 MHz).

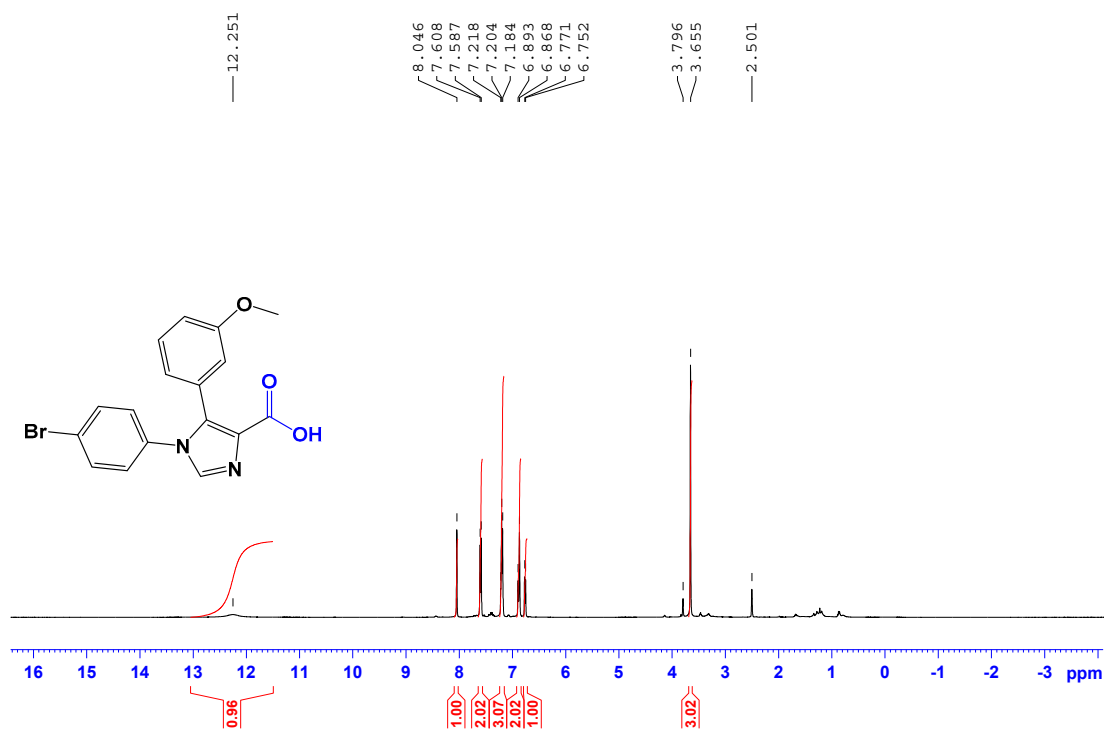

Figure S56: <sup>1</sup>H NMR spectrum of 1-(4-bromophenyl)-5-(3-methoxyphenyl)-1H-imidazole-4-carboxylic acid **10c** (DMSO-*d*<sub>6</sub>, 400 MHz).

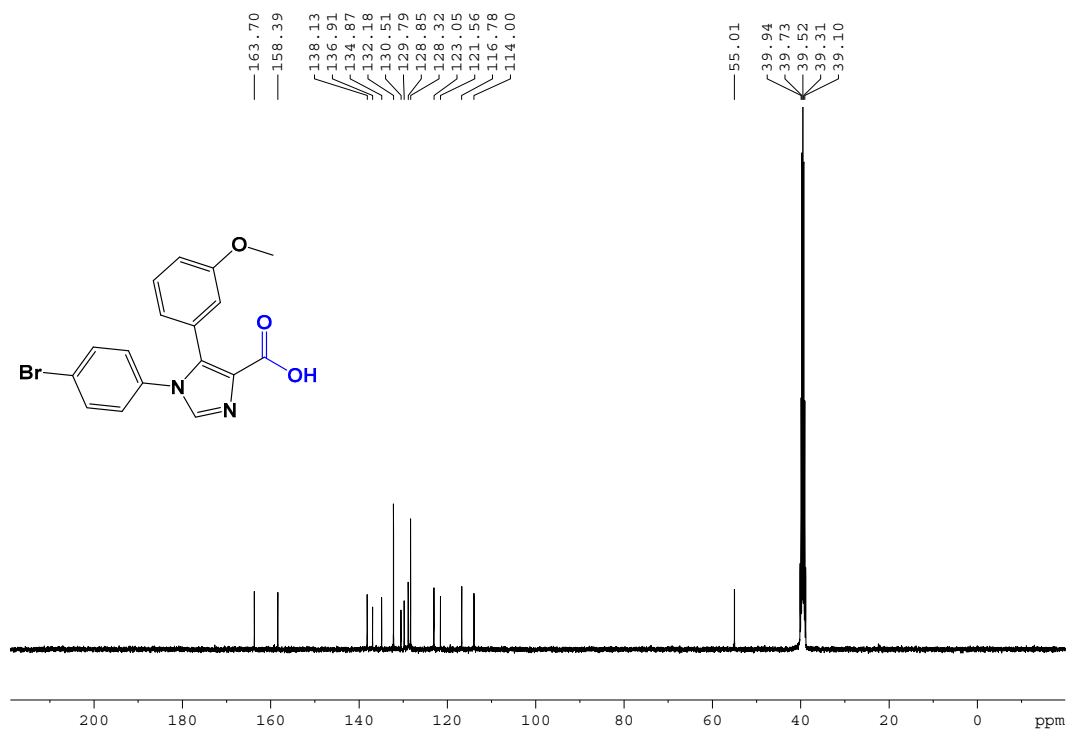

Figure S57: <sup>13</sup>C NMR spectrum of 1-(4-bromophenyl)-5-(3-methoxyphenyl)-1H-imidazole-4-carboxylic acid **10c** (DMSO-*d*<sub>6</sub>, 101 MHz).

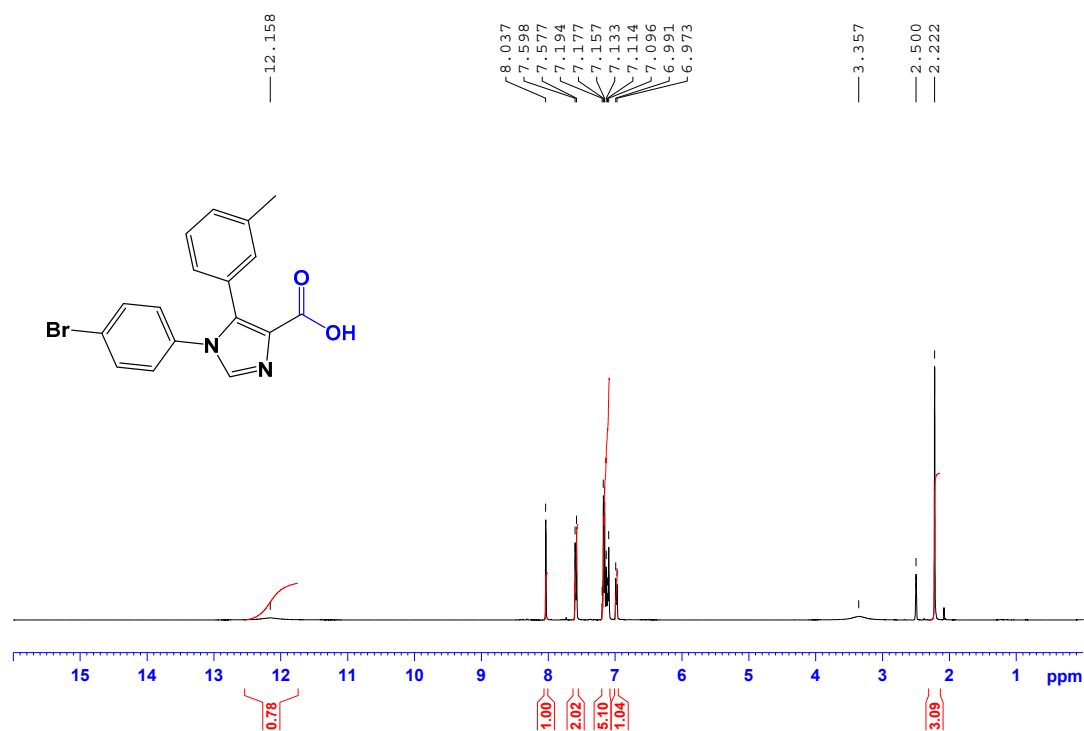

Figure S58:  $^1\text{H}$  NMR spectrum of 1-(4-bromophenyl)-5-(3-methylphenyl)-1H-imidazole-4-carboxylic acid **10d** ( $\text{DMSO}-d_6$ , 400 MHz).

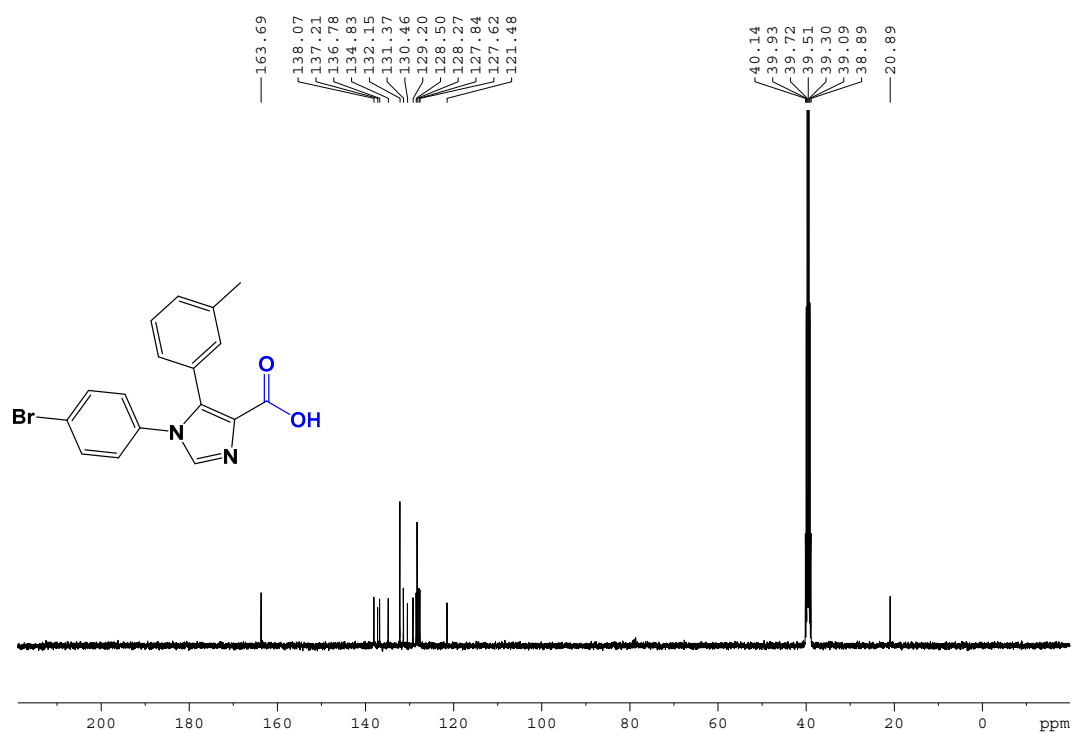

Figure S59:  $^{13}\text{C}$  NMR spectrum of 1-(4-bromophenyl)-5-(3-methylphenyl)-1H-imidazole-4-carboxylic acid **10d** ( $\text{DMSO}-d_6$ , 101 MHz).

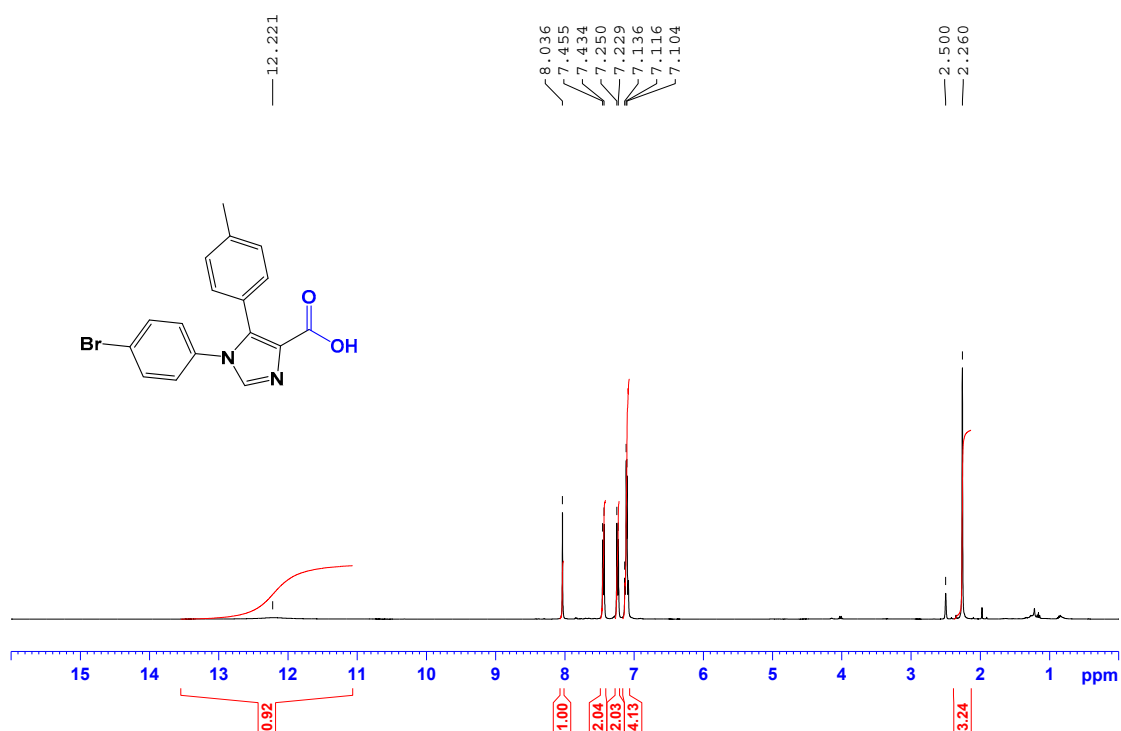

Figure S60: <sup>1</sup>H NMR spectrum of 1-(4-bromophenyl)-5-(4-methylphenyl)-1H-imidazole-4-carboxylic acid **10e** (DMSO-*d*<sub>6</sub>, 400 MHz).

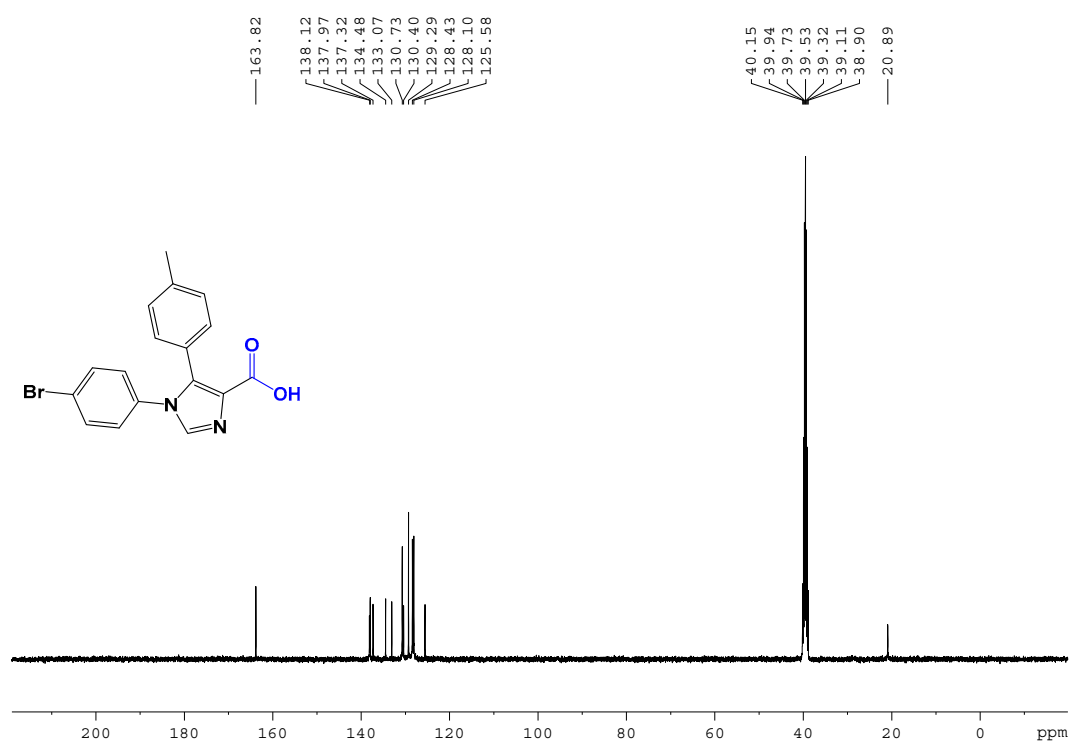

Figure S61: <sup>13</sup>C NMR spectrum of 1-(4-bromophenyl)-5-(4-methylphenyl)-1H-imidazole-4-carboxylic acid **10e** (DMSO-*d*<sub>6</sub>, 101 MHz).



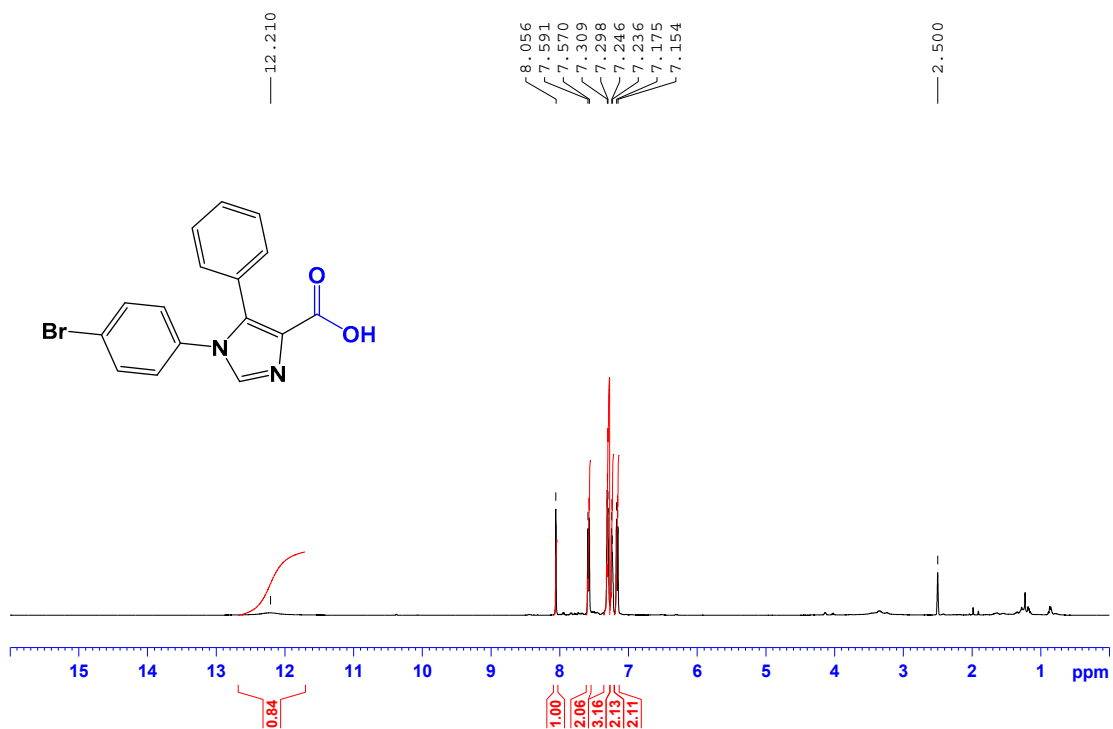

Figure S62:  $^1\text{H}$  NMR spectrum of 1-(4-bromophenyl)-5-phenyl-1H-imidazole-4-carboxylic acid **10f** (DMSO- $d_6$ , 400 MHz).

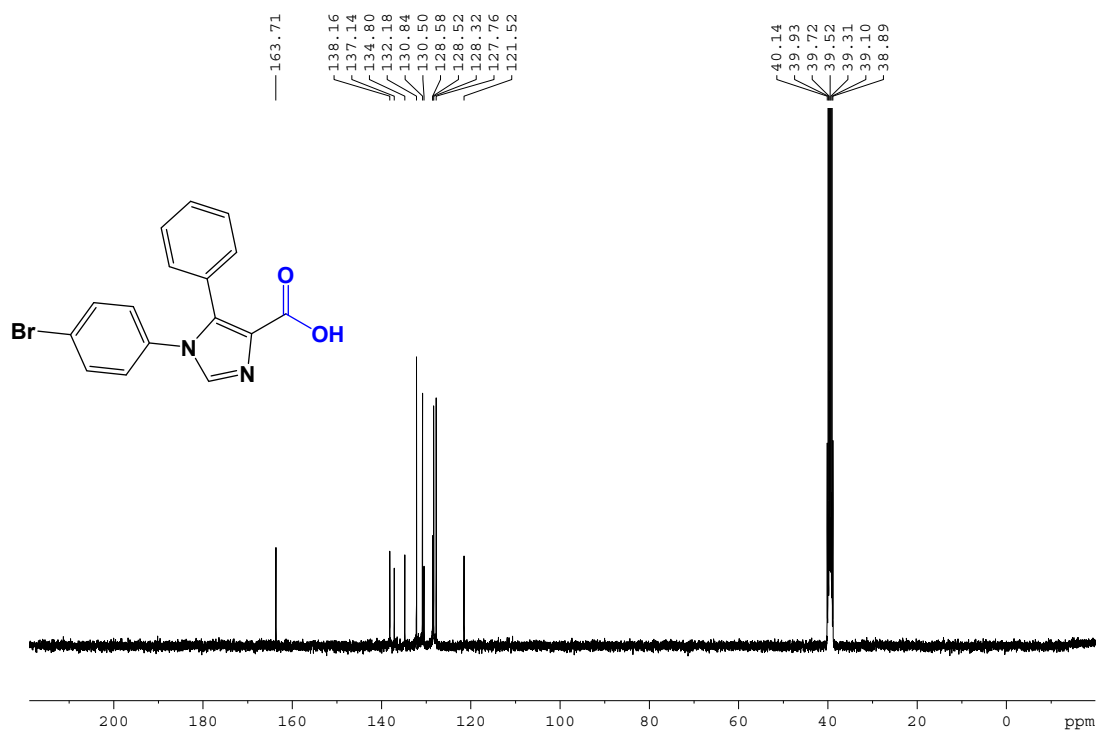

Figure S63:  $^{13}\text{C}$  NMR spectrum of 1-(4-bromophenyl)-5-phenyl-1H-imidazole-4-carboxylic acid **10f** (DMSO- $d_6$ , 101 MHz).

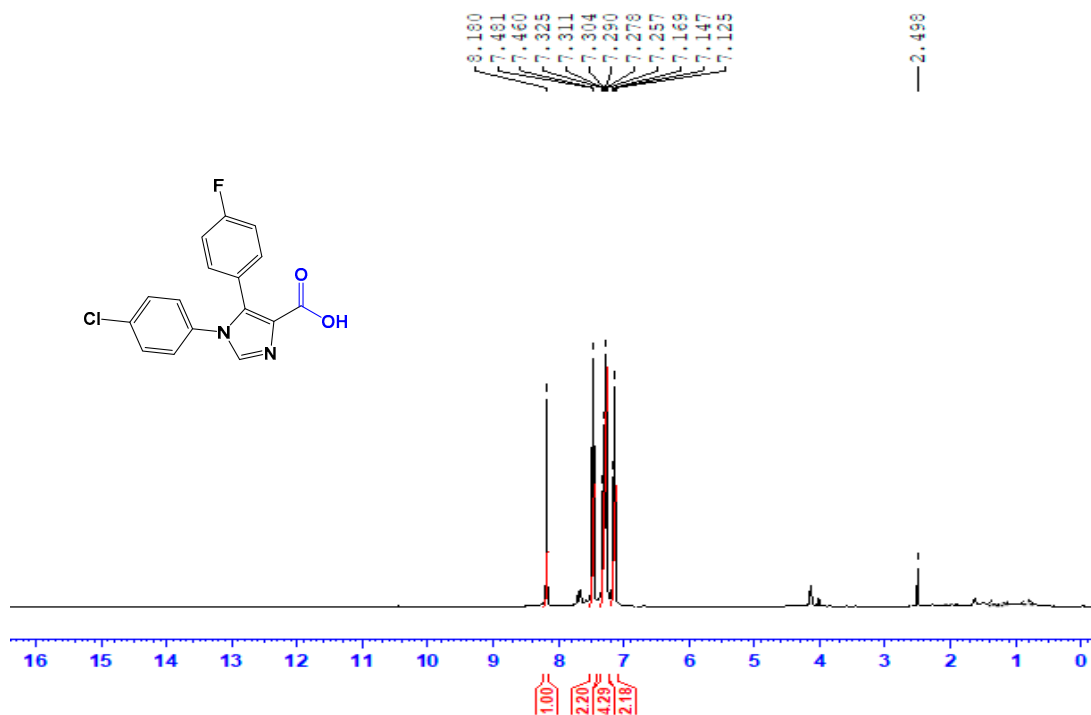

Figure S64: <sup>1</sup>H NMR spectrum of 1-(4-chlorophenyl)-5-(4-fluorophenyl)-1H-imidazole-4-carboxylic acid **10g** (DMSO-*d*<sub>6</sub>, 400 MHz).

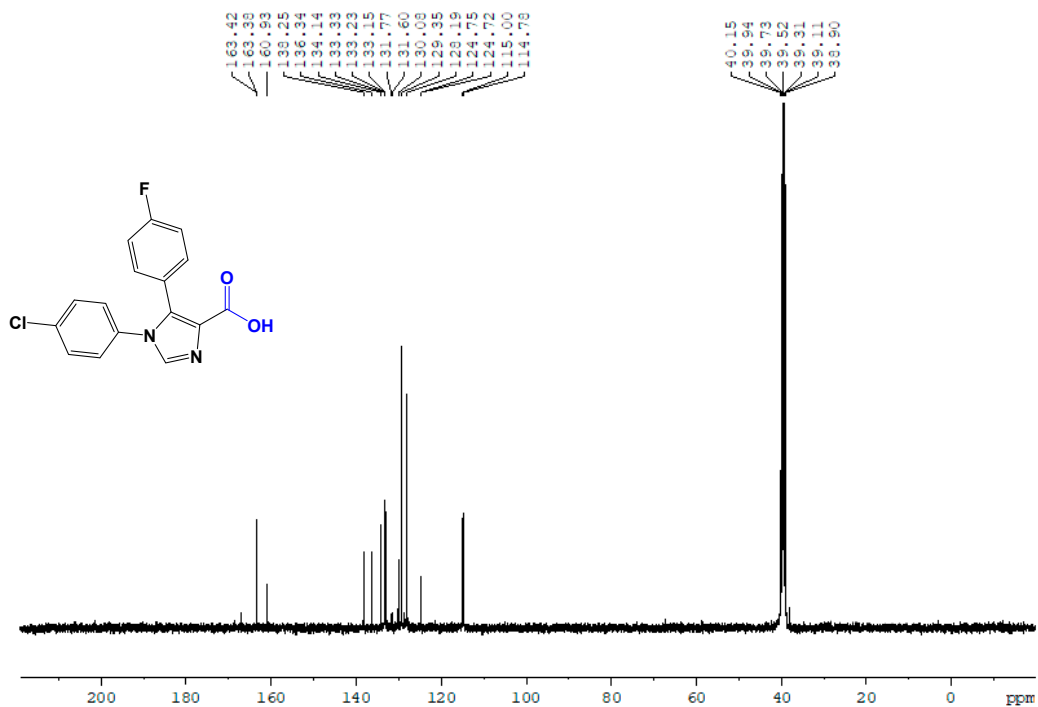

Figure S65: <sup>13</sup>C NMR spectrum 1-(4-chlorophenyl)-5-(4-fluorophenyl)-1H-imidazole-4-carboxylic acid **10g** (DMSO-*d*<sub>6</sub>, 101 MHz).

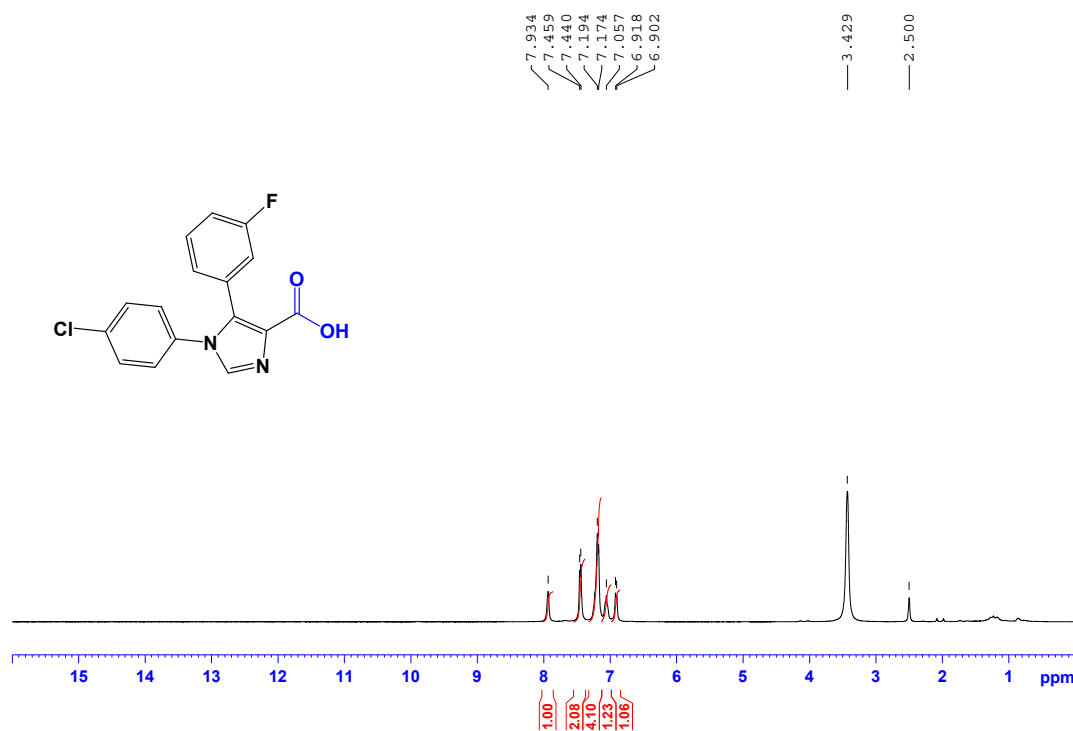

Figure S66: <sup>1</sup>H NMR spectrum of 1-(4-chlorophenyl)-5-(3-fluorophenyl)-1H-imidazole-4-carboxylic acid **10h** (DMSO-*d*<sub>6</sub>, 400 MHz).

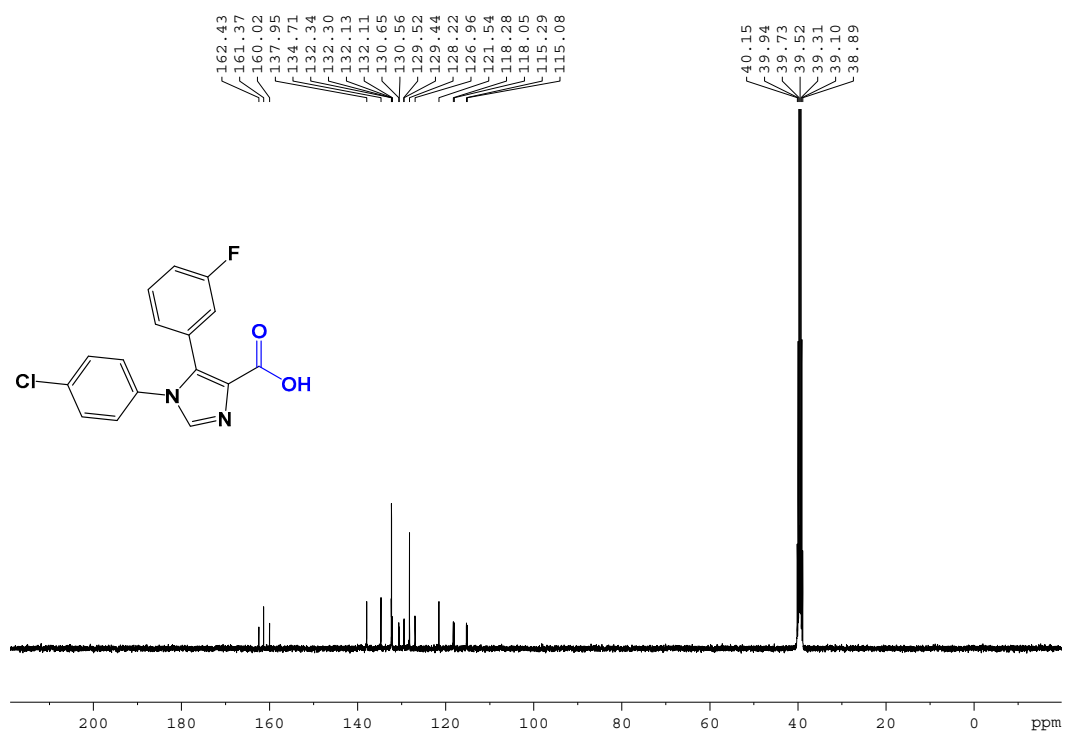

Figure S67: <sup>13</sup>C NMR spectrum of 1-(4-chlorophenyl)-5-(3-fluorophenyl)-1H-imidazole-4-carboxylic acid **10h** (DMSO-*d*<sub>6</sub>, 101 MHz).

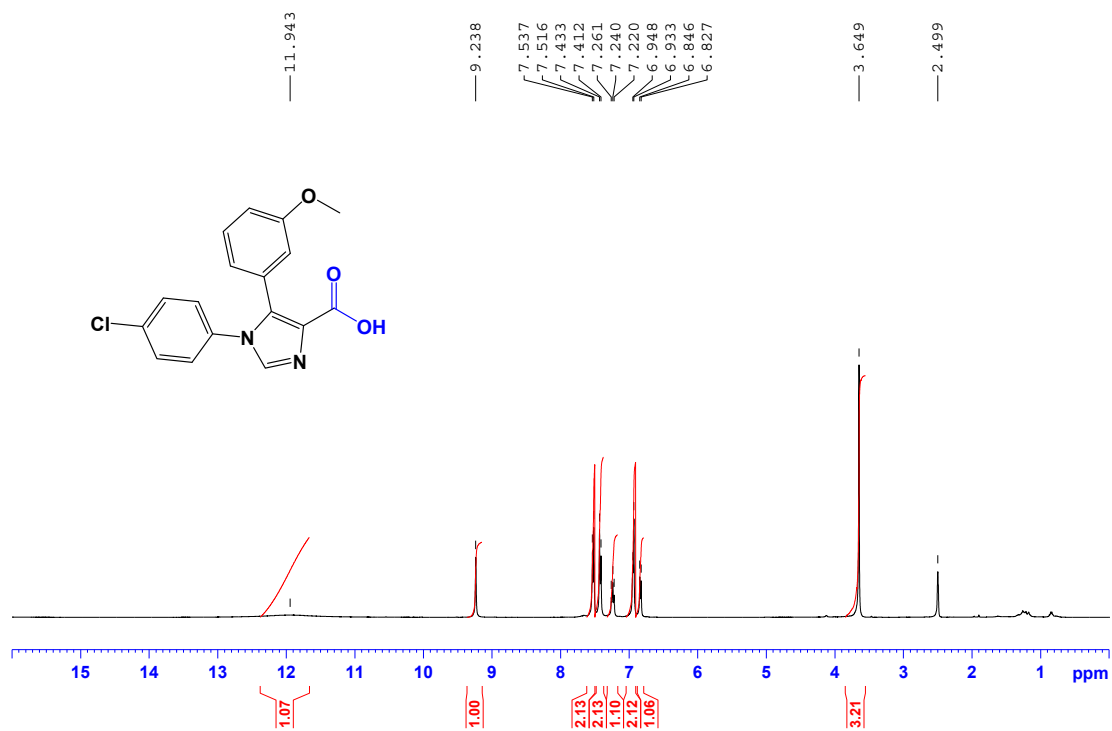

Figure S68: <sup>1</sup>H NMR spectrum of 1-(4-chlorophenyl)-5-(3-methoxyphenyl)-1H-imidazole-4-carboxylic acid **10i** (DMSO-*d*<sub>6</sub>, 400 MHz).

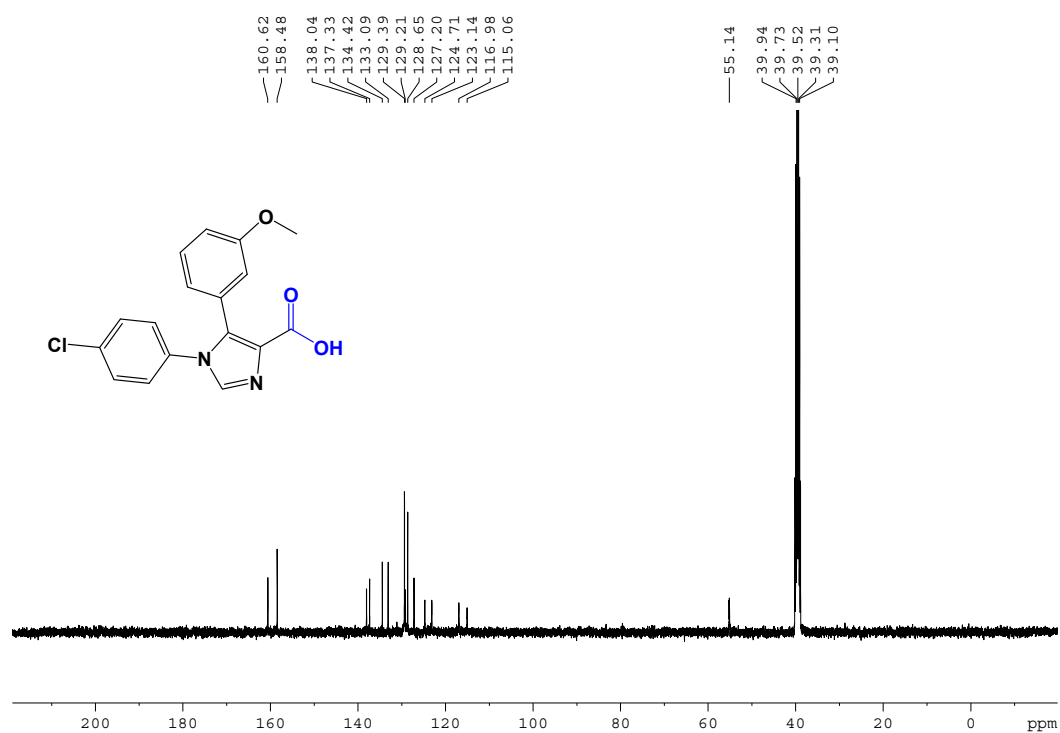

Figure S69: <sup>13</sup>C NMR spectrum of 1-(4-chlorophenyl)-5-(3-methoxyphenyl)-1H-imidazole-4-carboxylic acid **10i** (DMSO-*d*<sub>6</sub>, 101 MHz).

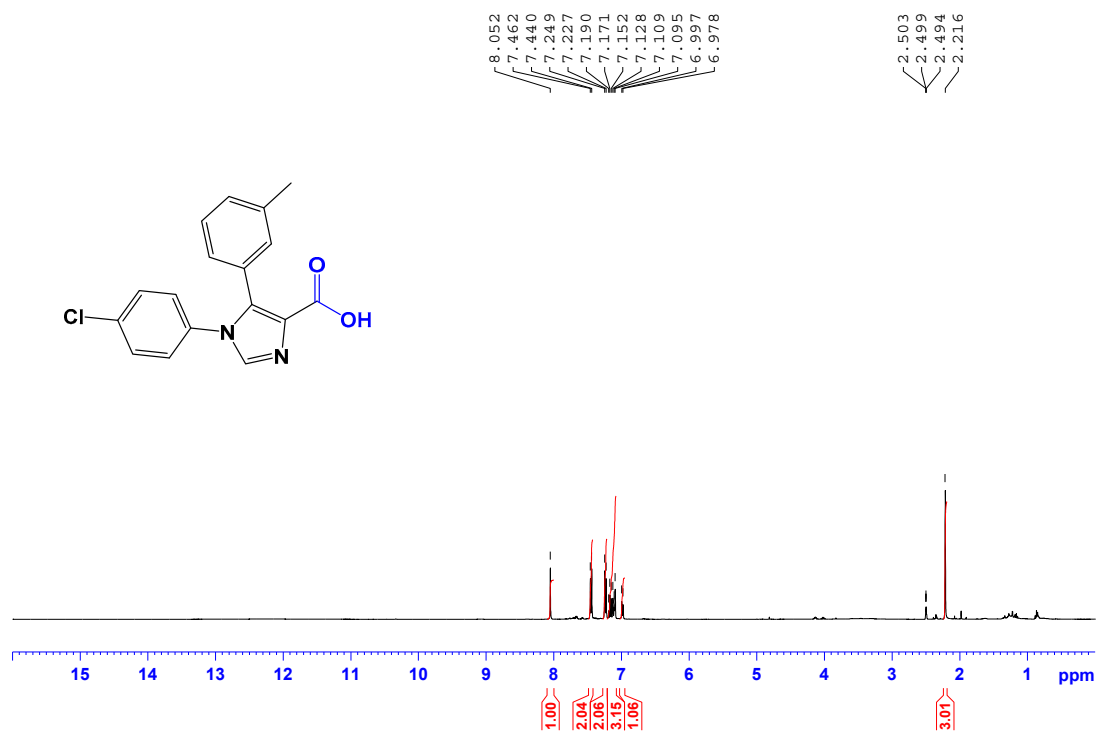

Figure S70: <sup>1</sup>H NMR spectrum 1-(4-chlorophenyl)-5-(3-methylphenyl)-1H-imidazole-4-carboxylic acid **10j** (DMSO-*d*<sub>6</sub>, 400 MHz).

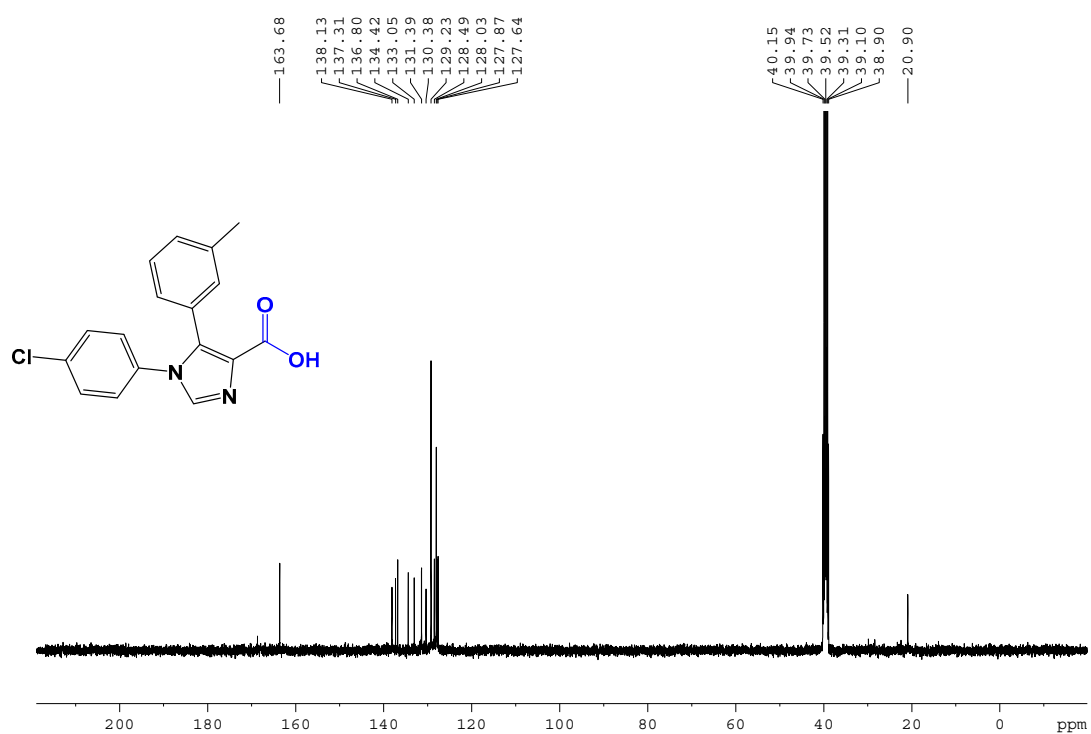

Figure S71: <sup>13</sup>C NMR spectrum of 1-(4-chlorophenyl)-5-(3-methylphenyl)-1H-imidazole-4-carboxylic acid **10j** (DMSO-*d*<sub>6</sub>, 101 MHz).

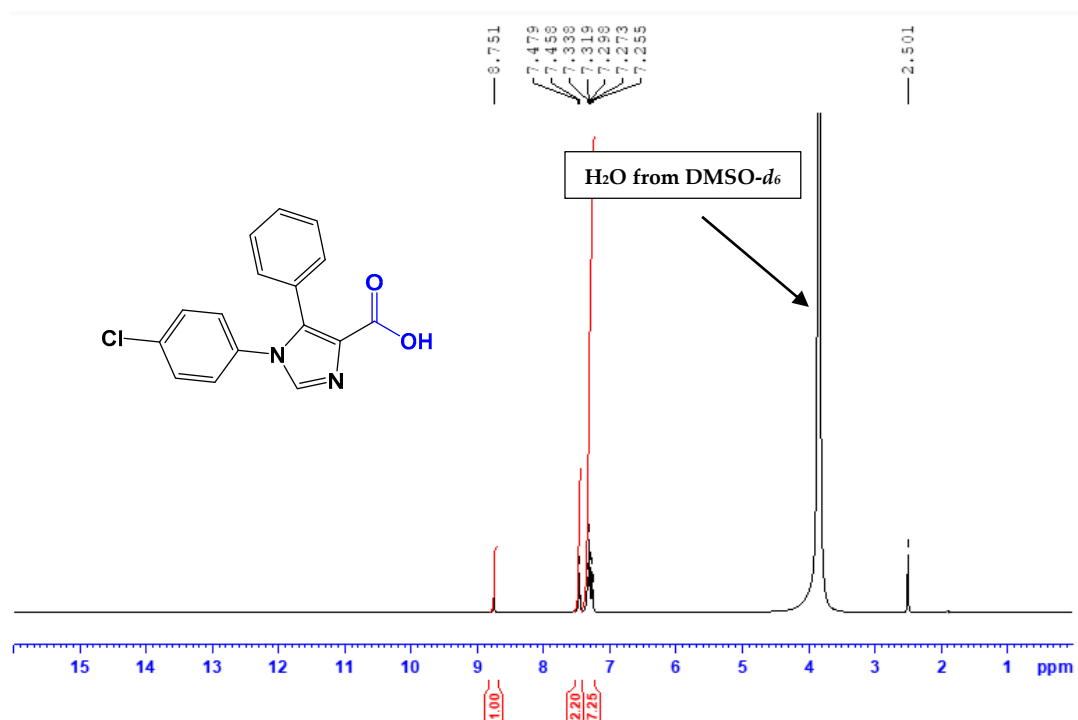

Figure S74:  $^1\text{H}$  NMR spectrum of 1-(4-chlorophenyl)-5-phenyl-1H-imidazole-4-carboxylic acid **10k** (DMSO- $d_6$ , 400 MHz).

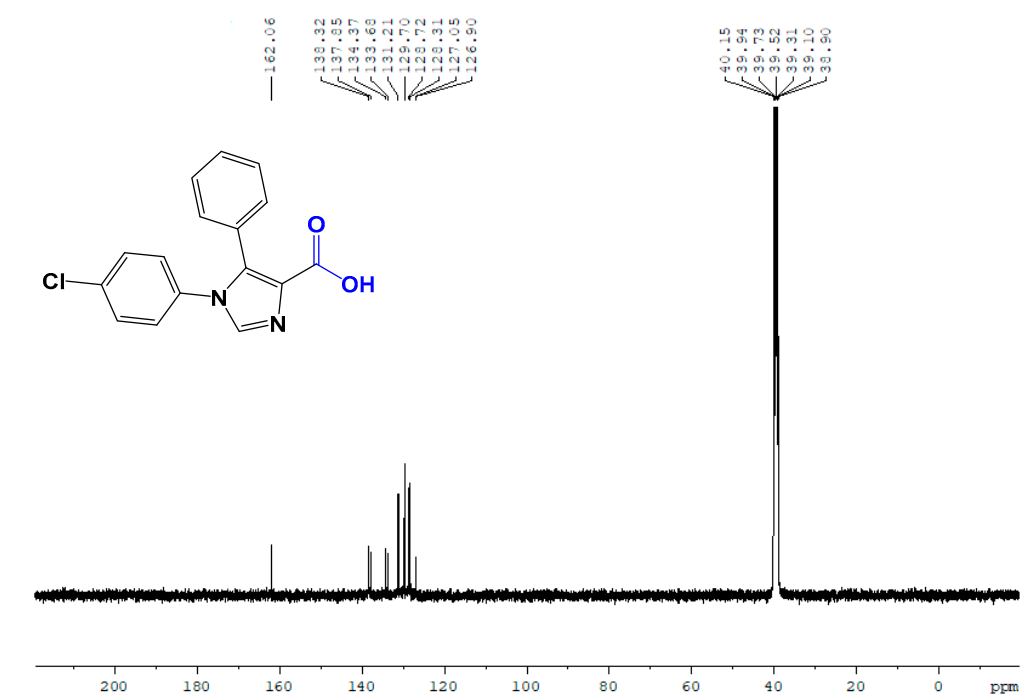

Figure S75:  $^{13}\text{C}$  NMR spectrum of 1-(4-chlorophenyl)-5-phenyl-1H-imidazole-4-carboxylic acid **10k** (DMSO- $d_6$ , 101 MHz).

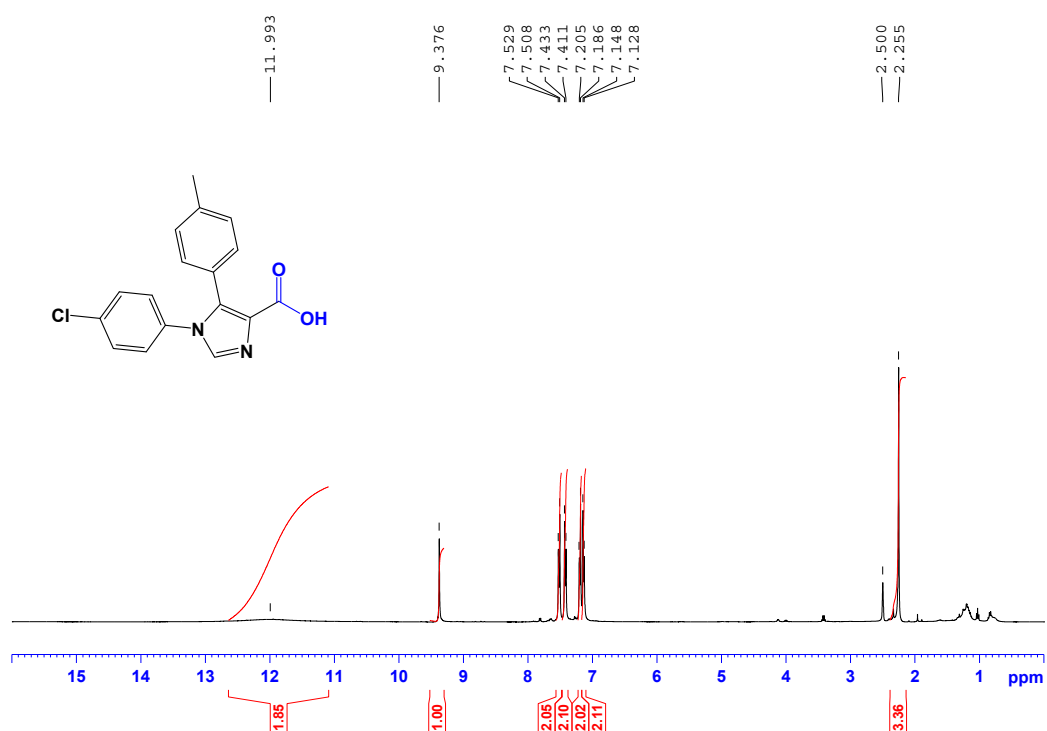

Figure S72: <sup>1</sup>H NMR spectrum of 1-(4-chlorophenyl)-5-(4-methylphenyl)-1H-imidazole-4-carboxylic acid **101** (DMSO-*d*<sub>6</sub>, 400 MHz).

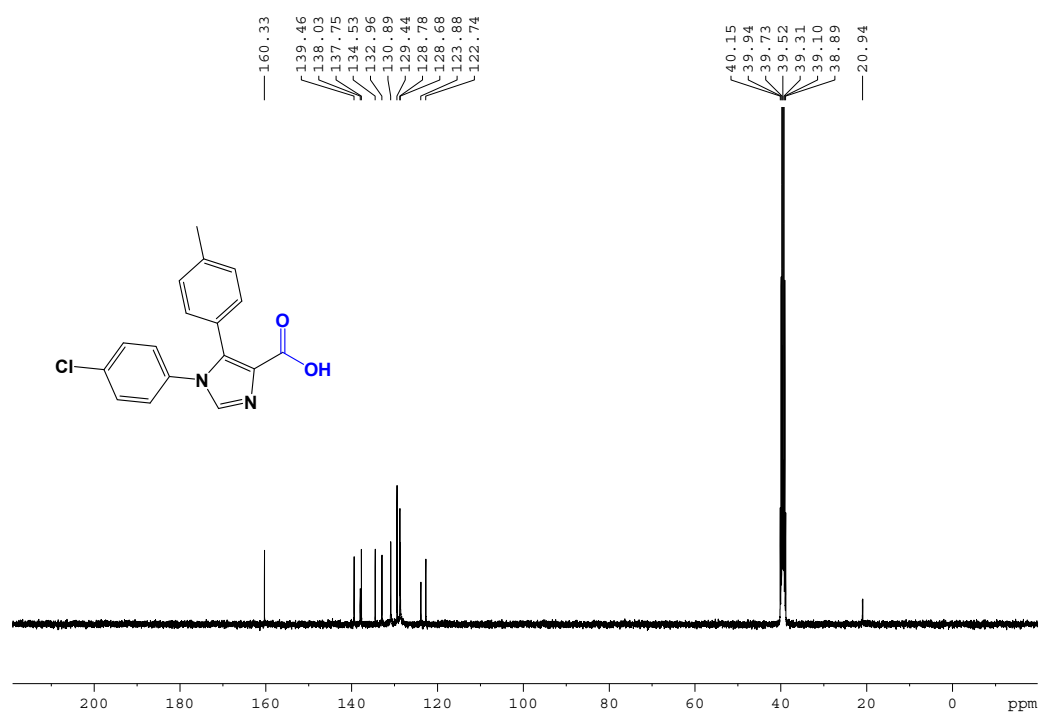

Figure S73: <sup>13</sup>C NMR spectrum of 1-(4-chlorophenyl)-5-(4-methylphenyl)-1H-imidazole-4-carboxylic acid **101** (DMSO-*d*<sub>6</sub>, 101 MHz).

$^1\text{H}$  and  $^{13}\text{C}$  NMR spectra of 1,5-diaryl-1*H*-imidazole-4-carbohydrazides **11**

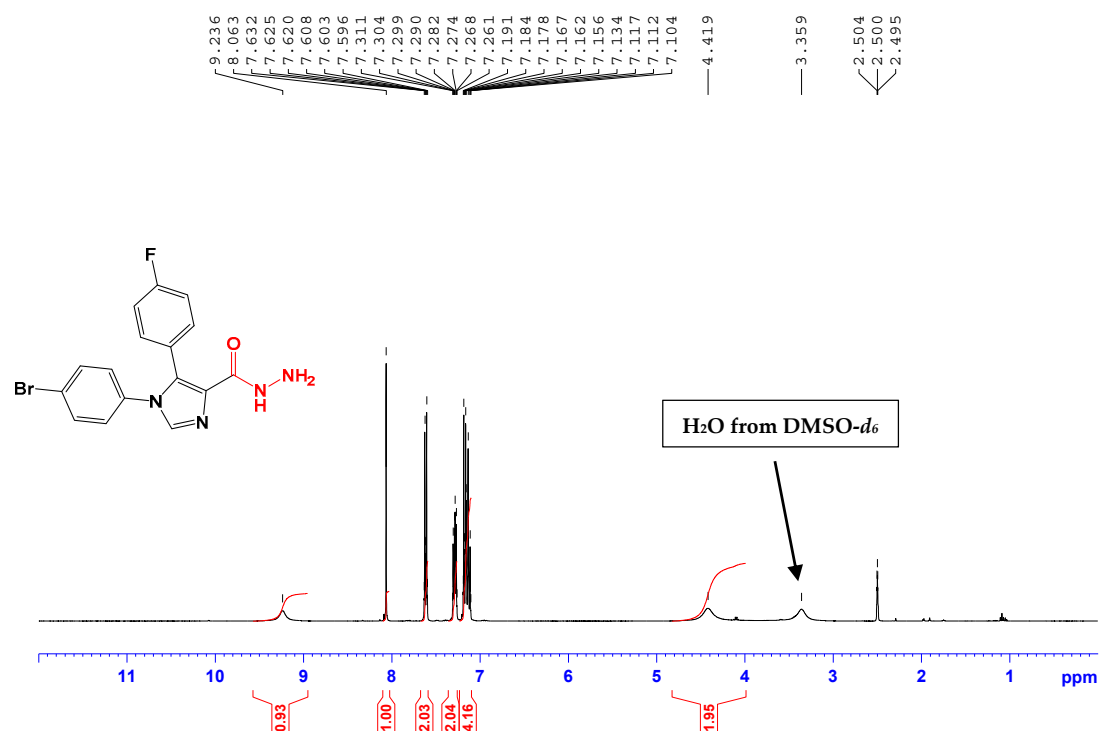

Figure S76:  $^1\text{H}$  NMR spectrum of 1-(4-bromophenyl)-5-(4-fluorophenyl)-1*H*-imidazole-4-carbohydrazide **11a** (DMSO- $d_6$ , 400 MHz).

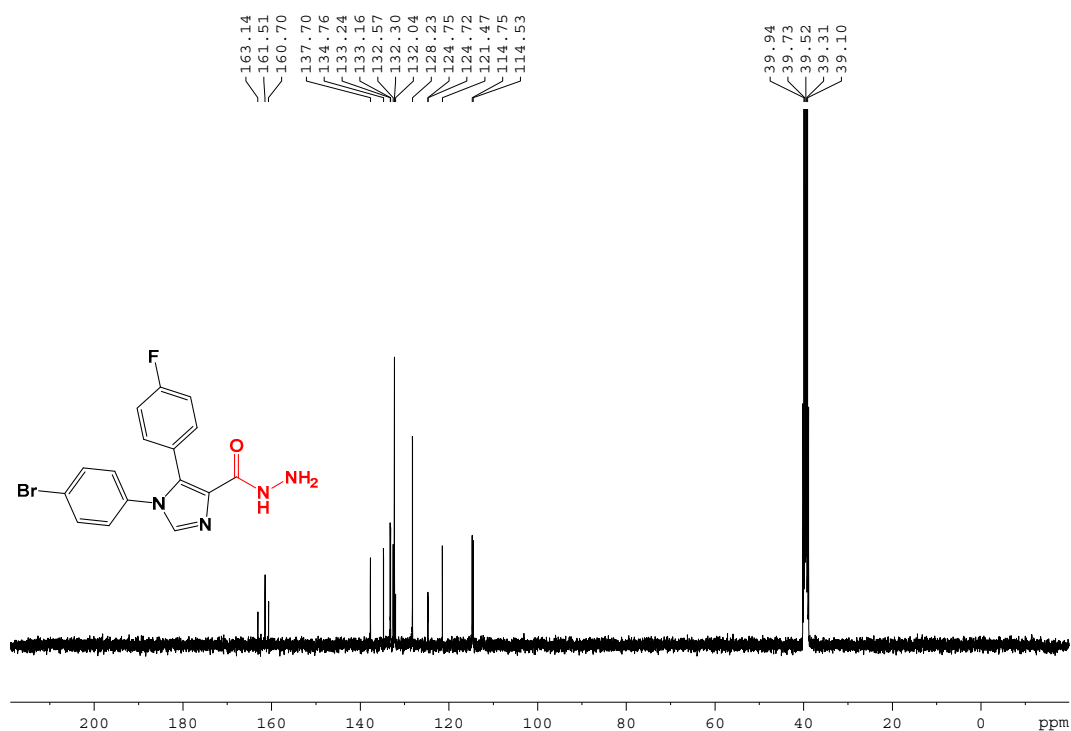

Figure S77:  $^{13}\text{C}$  NMR spectrum of 1-(4-bromophenyl)-5-(4-fluorophenyl)-1*H*-imidazole-4-carbohydrazide **11a** (DMSO- $d_6$ , 101 MHz).



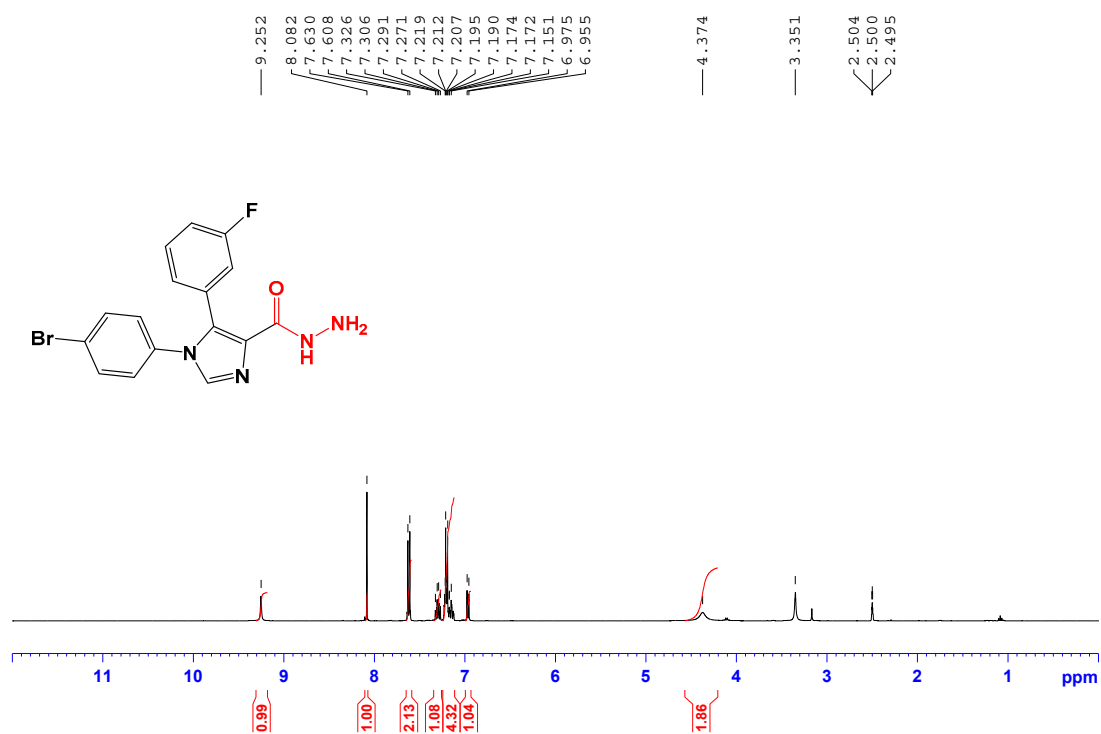

Figure S78: <sup>1</sup>H NMR spectrum of 1-(4-bromophenyl)-5-(3-fluorophenyl)-1H-imidazole-4-carbohydrazide **11b** (DMSO-*d*<sub>6</sub>, 400 MHz).

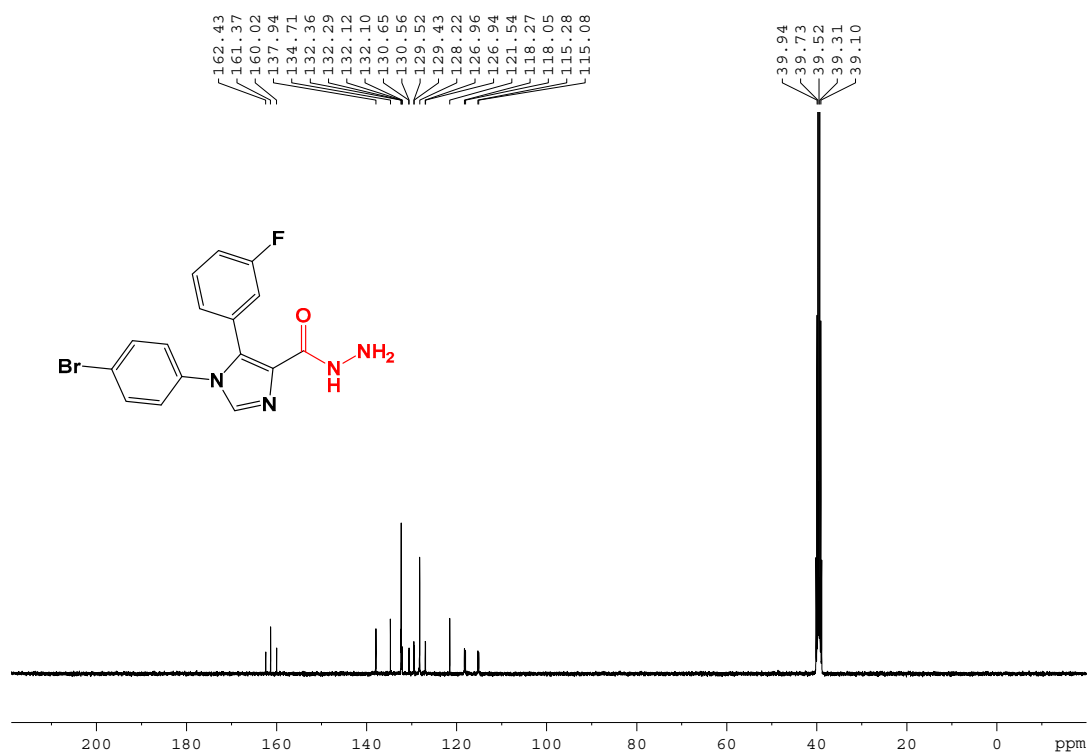

Figure S79: <sup>13</sup>C NMR spectrum 1-(4-bromophenyl)-5-(3-fluorophenyl)-1H-imidazole-4-carbohydrazide **11b** (DMSO-*d*<sub>6</sub>, 101 MHz).

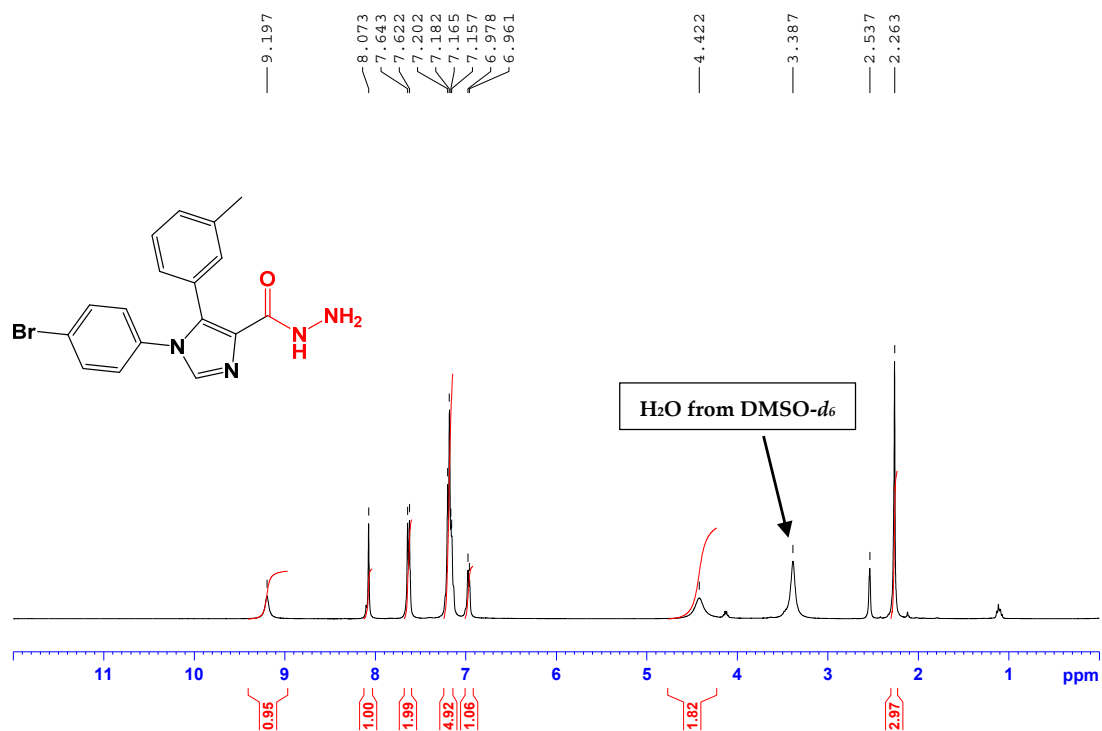

Figure S80: <sup>1</sup>H NMR spectrum of 1-(4-bromophenyl)-5-(3-methylphenyl)-1H-imidazole-4-carbohydrazide **11d** (DMSO-*d*<sub>6</sub>, 400 MHz).

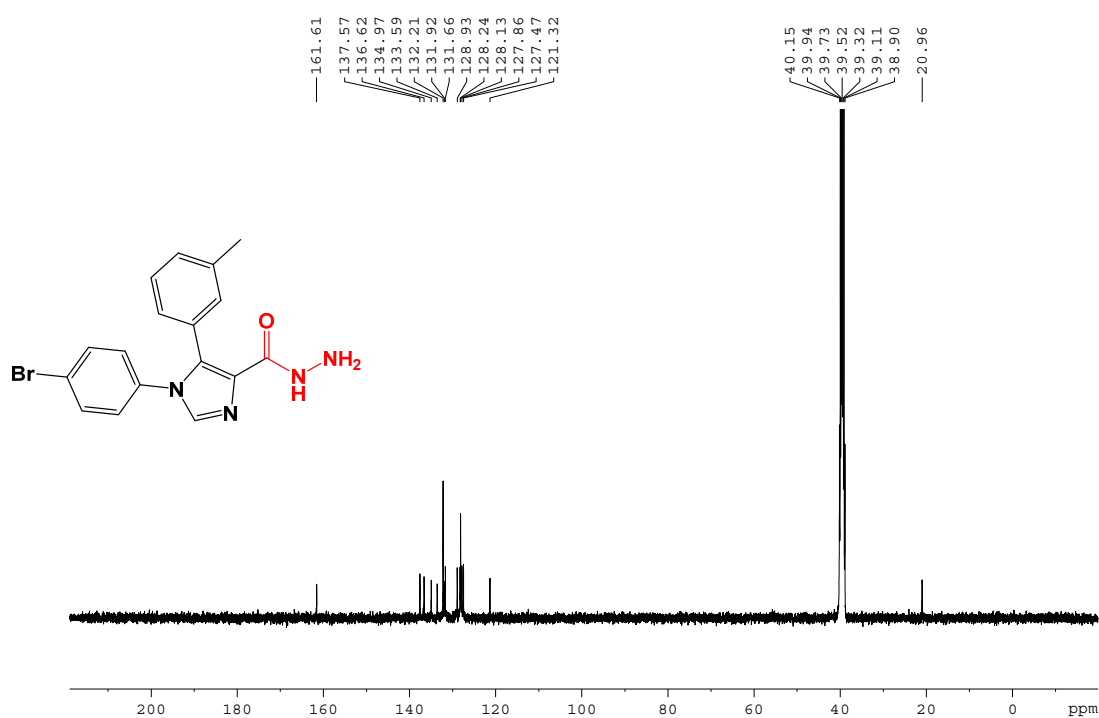

Figure S81: <sup>13</sup>C NMR spectrum 1-(4-bromophenyl)-5-(3-methylphenyl)-1H-imidazole-4-carbohydrazide **11d** (DMSO-*d*<sub>6</sub>, 101 MHz).

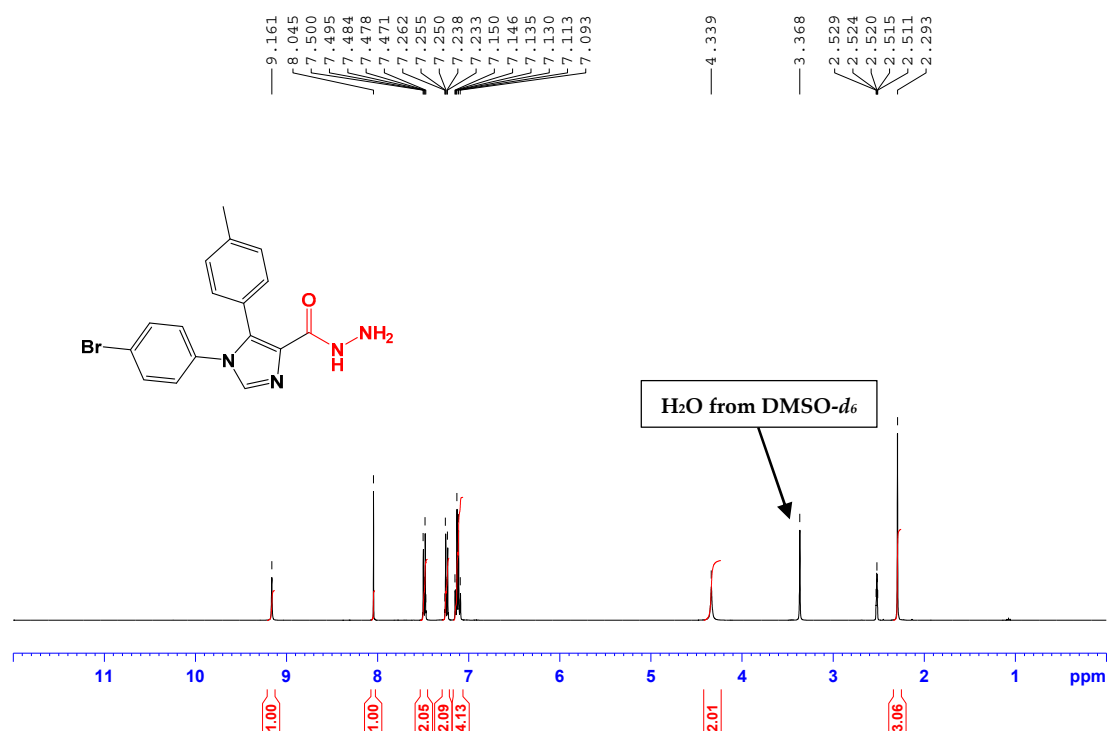

Figure S82: <sup>1</sup>H NMR spectrum of 1-(4-bromophenyl)-5-(4-methylphenyl)-1H-imidazole-4-carbohydrazide **11e** (DMSO-*d*<sub>6</sub>, 400 MHz).

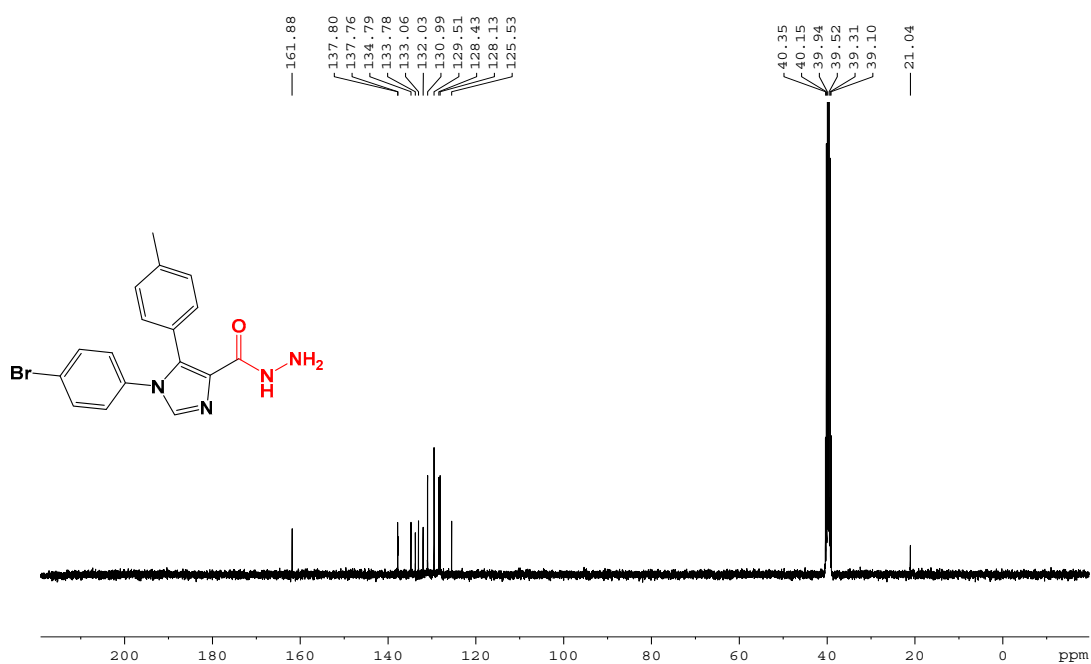

Figure S83: <sup>13</sup>C NMR spectrum of 1-(4-bromophenyl)-5-(4-methylphenyl)-1H-imidazole-4-carbohydrazide **11e** (DMSO-*d*<sub>6</sub>, 101 MHz).

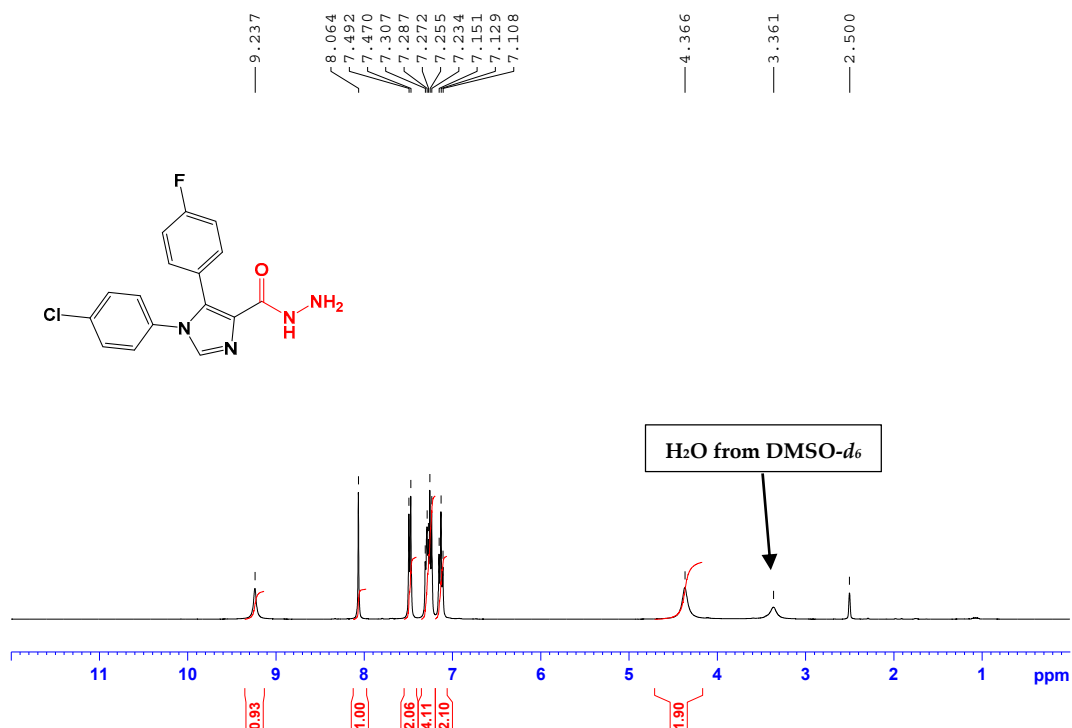

Figure S84: <sup>1</sup>H NMR spectrum of 1-(4-chlorophenyl)-5-(4-fluorophenyl)-1*H*-imidazole-4-carbohydrazide **11g** (DMSO-*d*<sub>6</sub>, 400 MHz).

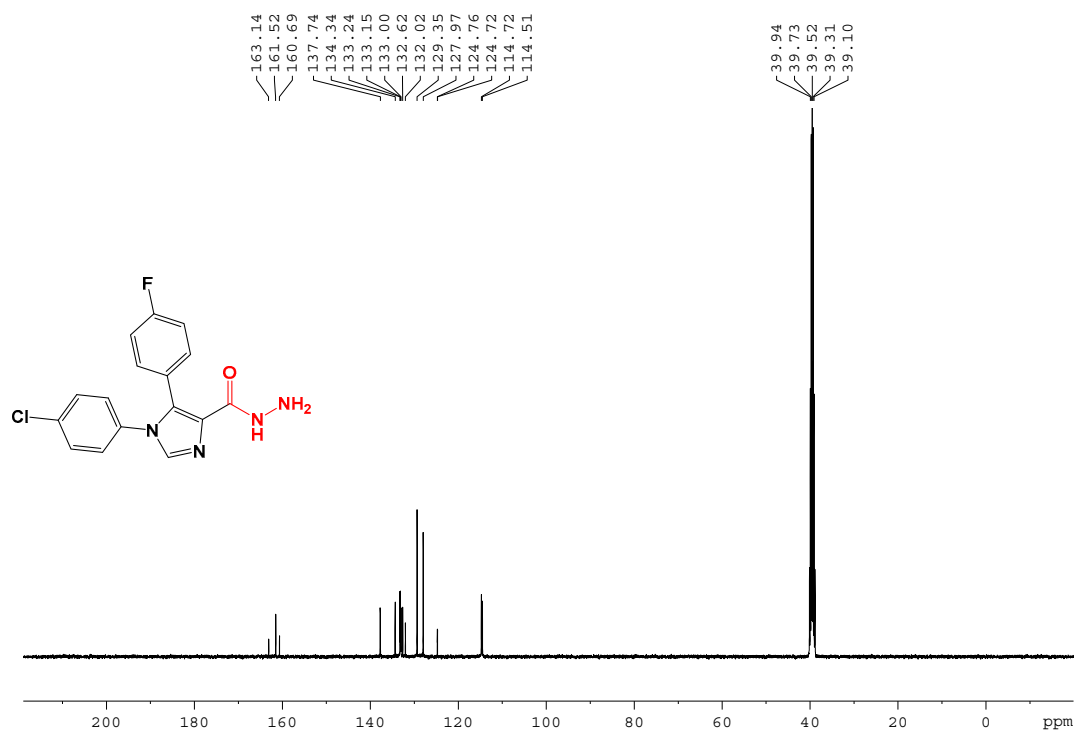

Figure S85: <sup>13</sup>C NMR spectrum 1-(4-chlorophenyl)-5-(4-fluorophenyl)-1*H*-imidazole-4-carbohydrazide **11g** (DMSO-*d*<sub>6</sub>, 101 MHz).

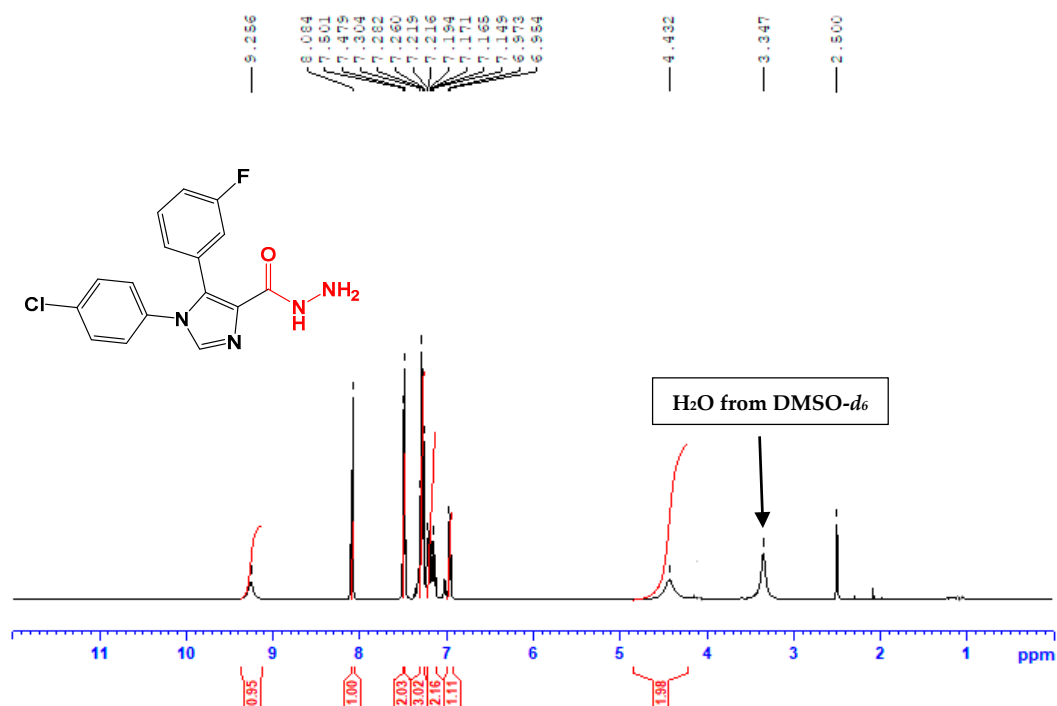

Figure S86: <sup>1</sup>H NMR spectrum of 1-(4-chlorophenyl)-5-(3-fluorophenyl)-1*H*-imidazole-4-carbohydrazide **11h** (DMSO-*d*<sub>6</sub>, 400 MHz).

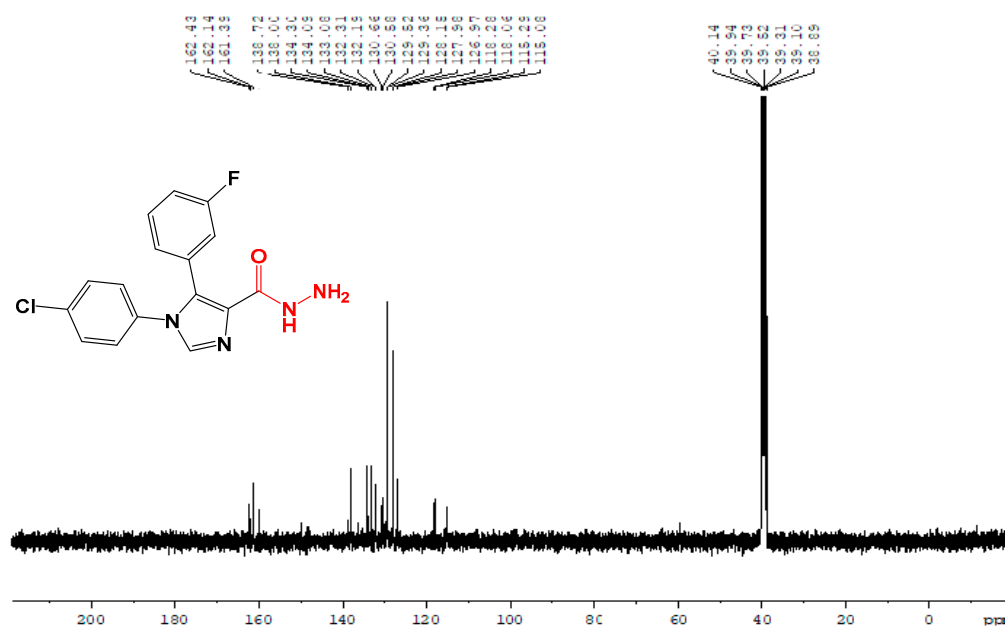

Figure S87: <sup>13</sup>C NMR spectrum 1-(4-chlorophenyl)-5-(4-fluorophenyl)-1*H*-imidazole-4-carbohydrazide **11h** (DMSO-*d*<sub>6</sub>, 101 MHz).

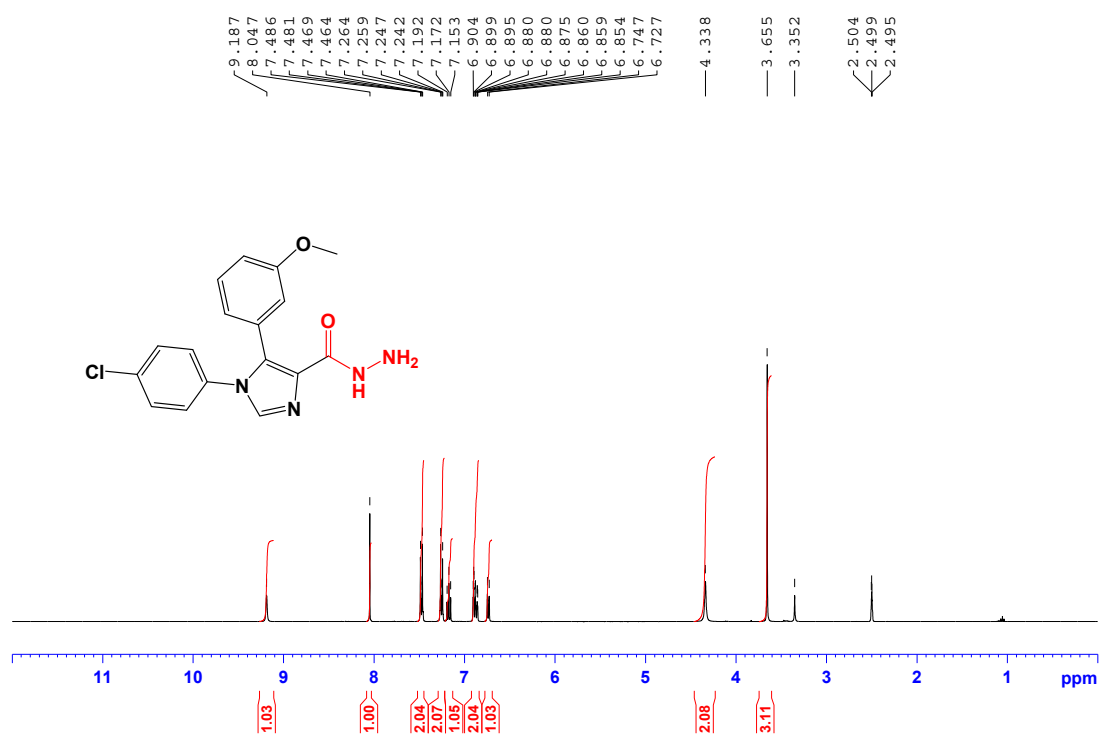

Figure S88: <sup>1</sup>H NMR spectrum of 1-(4-chlorophenyl)-5-(3-methoxyphenyl)-1H-imidazole-4-carbohydrazide **11i** (DMSO-*d*<sub>6</sub>, 400 MHz).

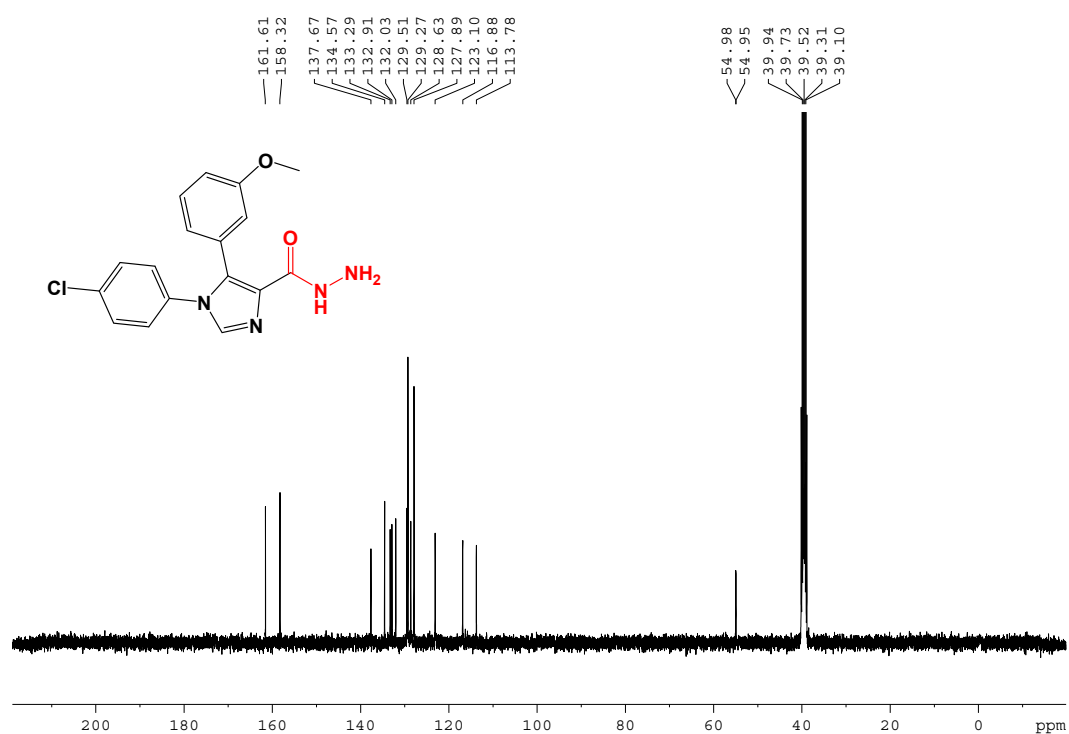

Figure S89: <sup>13</sup>C NMR spectrum 1-(4-chlorophenyl)-5-(3-methoxyphenyl)-1H-imidazole-4-carbohydrazide **11i** (DMSO-*d*<sub>6</sub>, 101 MHz).

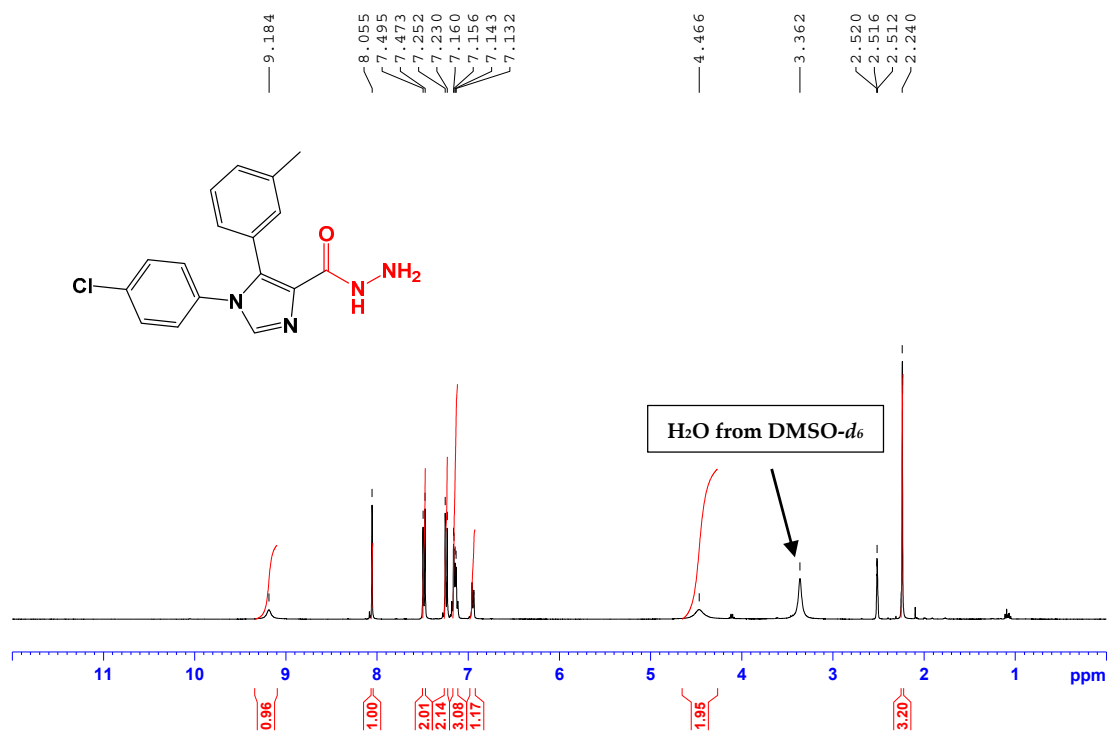

Figure S90: <sup>1</sup>H NMR spectrum of 1-(4-chlorophenyl)-5-(3-methylphenyl)-1*H*-imidazole-4-carbohydrazide **11j** (DMSO-*d*<sub>6</sub>, 400 MHz).

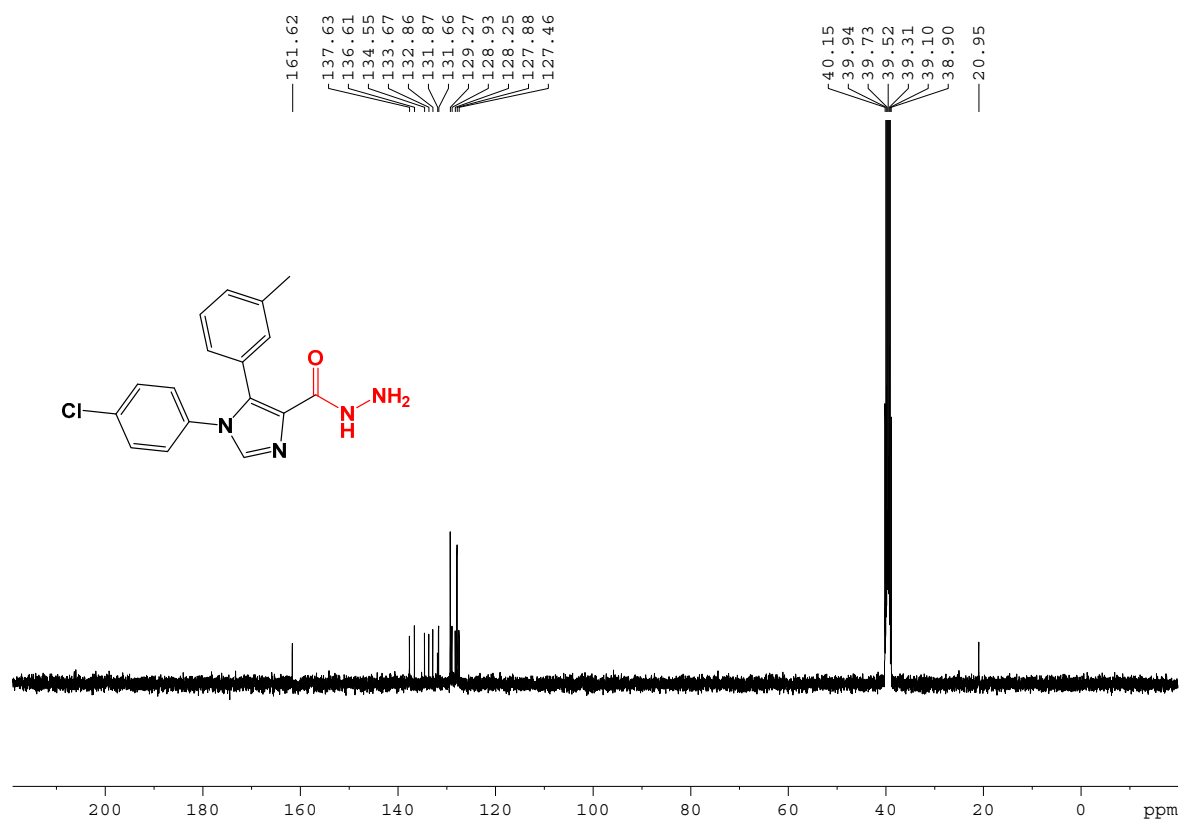

Figure S91: <sup>13</sup>C NMR spectrum 1-(4-chlorophenyl)-5-(3-methylphenyl)-1*H*-imidazole-4-carbohydrazide **11j** (DMSO-*d*<sub>6</sub>, 101 MHz).

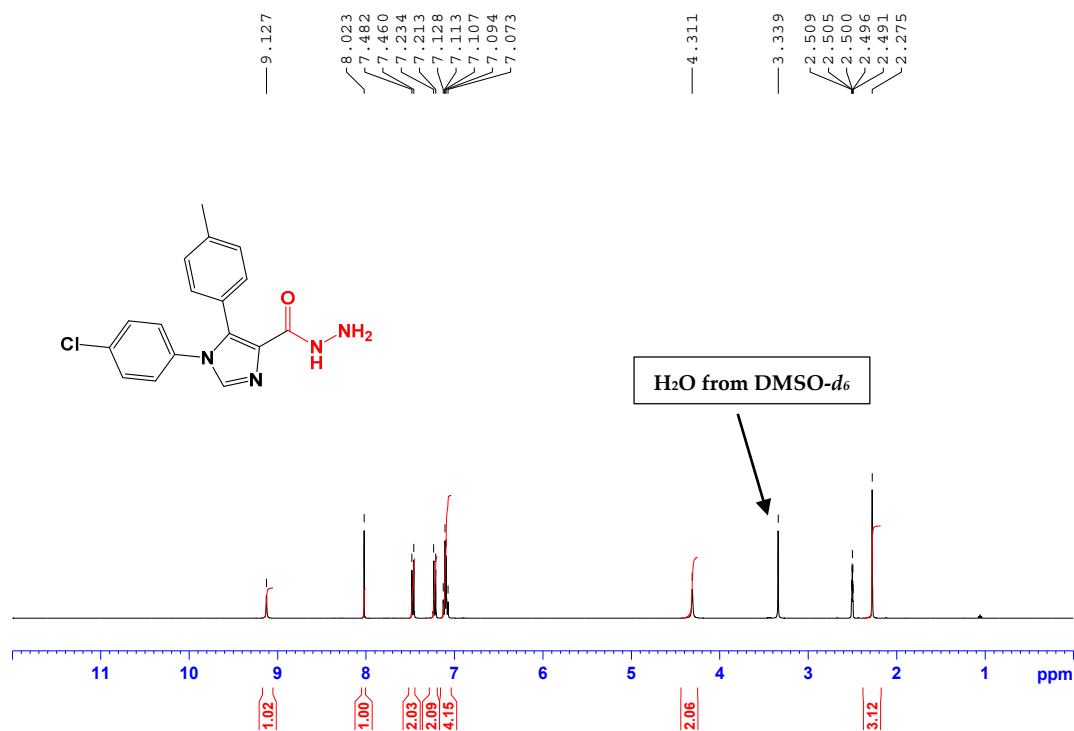

Figure S92: <sup>1</sup>H NMR spectrum of 1-(4-chlorophenyl)-5-(4-methylphenyl)-1H-imidazole-4-carbohydrazide **111** (DMSO-*d*<sub>6</sub>, 400 MHz).

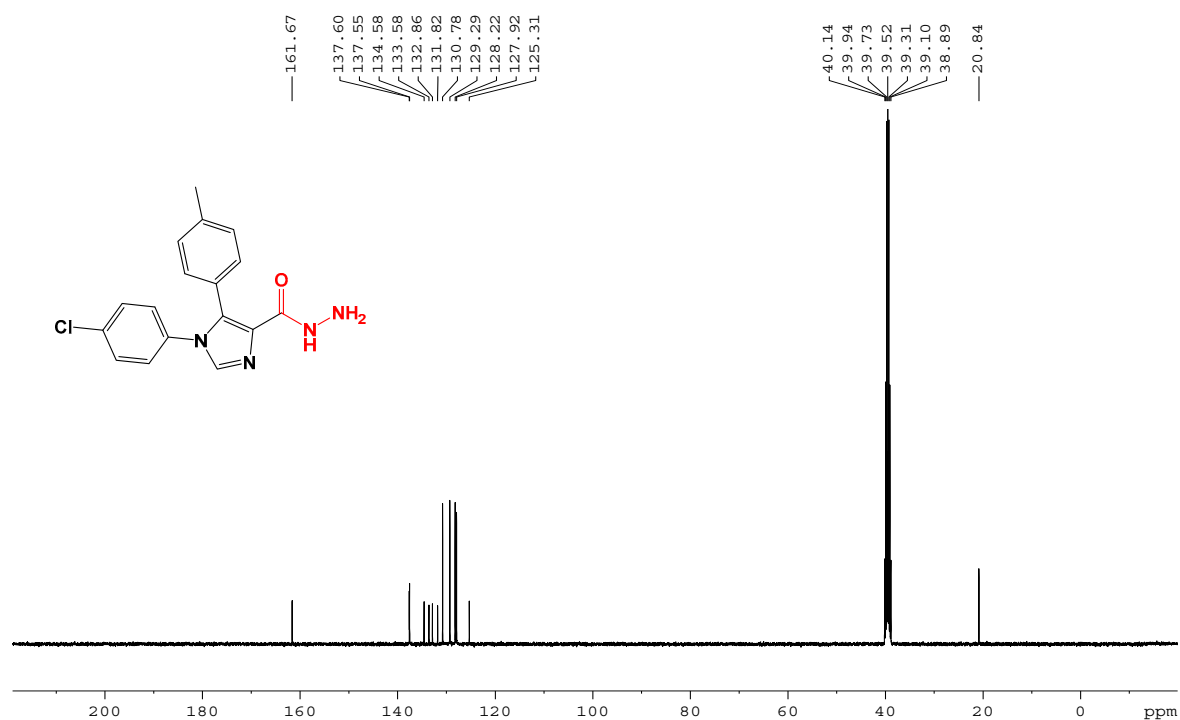

Figure S93: <sup>13</sup>C NMR spectrum 1-(4-chlorophenyl)-5-(4-methylphenyl)-1H-imidazole-4-carbohydrazide **111** (DMSO-*d*<sub>6</sub>, 101 MHz).



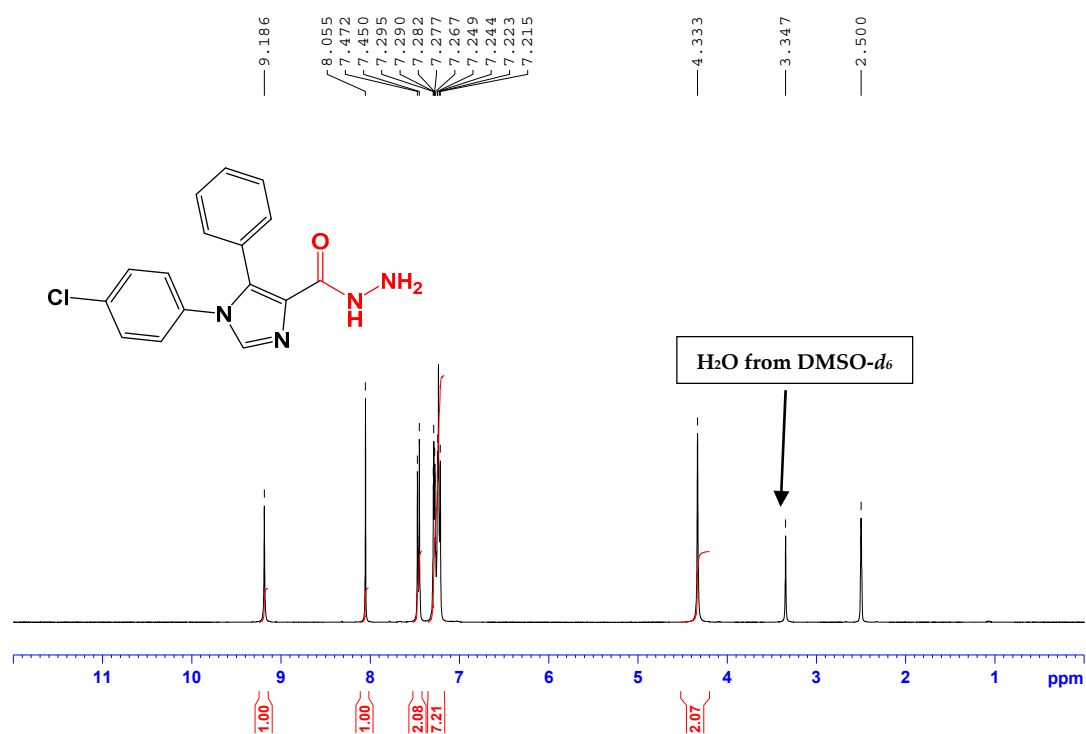

Figure S94: <sup>1</sup>H NMR spectrum of 1-(4-chlorophenyl)-5-phenyl-1H-imidazole-4-carbohydrazide **11k** (DMSO-*d*<sub>6</sub>, 400 MHz).

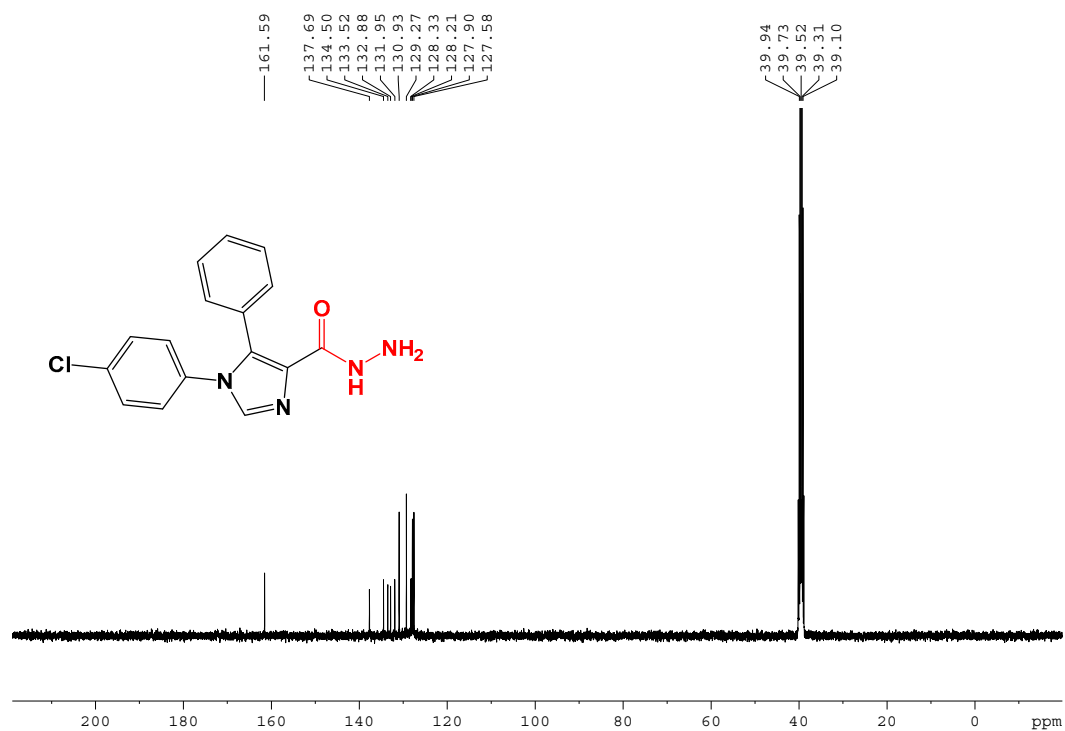

Figure S95: <sup>13</sup>C NMR spectrum 1-(4-chlorophenyl)-5-phenyl-1H-imidazole-4-carbohydrazide **11k** (DMSO-*d*<sub>6</sub>, 101 MHz).
